# Supplementary material for: 'Muren en Buren: 100 jaar Woningwet'
Source: Royal Society of Chemistry journal article supplement (doi:10.1039/c0cc01957g), 2001-01-01
Supplement: c0cc01957g.pdf [file c0cc01957g.pdf]

## Multiple approaches to enantiopure spirocyclic benzofuranones using organocatalytic cascade reactions

Carlo Cassani,<sup>[a]</sup> Xu Tian,<sup>[a]</sup> Eduardo C. Escudero-Adán,<sup>[a]</sup> and Paolo Melchiorre\*<sup>[a,b]</sup>

<sup>a</sup> ICIQ - Institute of Chemical Research of Catalonia, Av. Països Catalans 16 - 43007 Tarragona, Spain

<sup>b</sup> ICREA - Institució Catalana de Recerca i Estudis Avançats, Pg. Lluís Companys 23 - 08010 Barcelona, Spain

e-mail: [pmelchiorre@iciq.es](mailto:pmelchiorre@iciq.es)

web page: <http://www.iciq.es/portal/862/Melchiorre.aspx>

### Supplementary Information

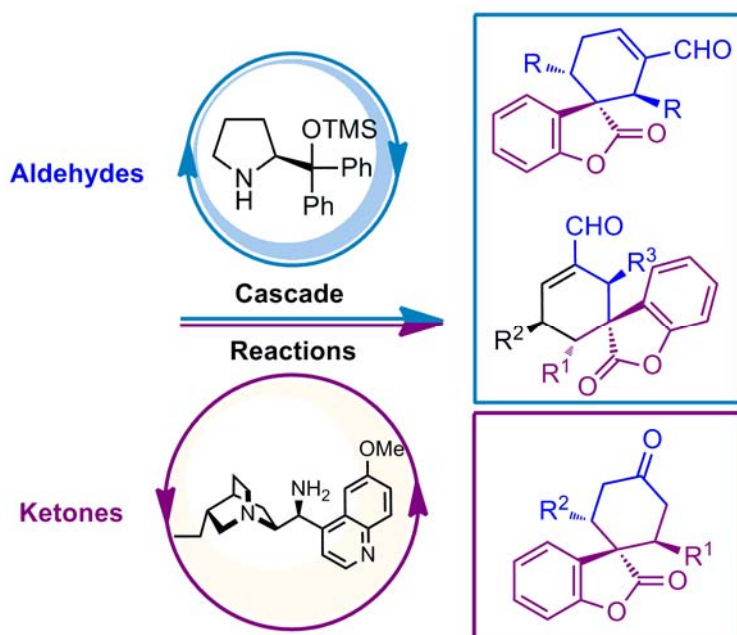

## Table of Contents

|                                                                                                                                       |            |
|---------------------------------------------------------------------------------------------------------------------------------------|------------|
| <b>General</b>                                                                                                                        | <b>S3</b>  |
| <b>Materials</b>                                                                                                                      | <b>S3</b>  |
| <b>Determination of Diastereomeric and Enantiomeric Ratios</b>                                                                        | <b>S4</b>  |
| <br>                                                                                                                                  |            |
| <b>Structural and absolute configuration determination</b>                                                                            | <b>S4</b>  |
| X-ray Data for compound 3d                                                                                                            | S4         |
| X-ray Data for compound 6b                                                                                                            | S6         |
| X-ray Data for compound 8b                                                                                                            | S7         |
| <br>                                                                                                                                  |            |
| <b>Influence of the compound 4 geometry on the stereochemical outcome of the cascade reactions</b>                                    | <b>S9</b>  |
| <br>                                                                                                                                  |            |
| <b>Experimental procedures</b>                                                                                                        | <b>S10</b> |
| General Procedure for the Organocatalytic Triple Cascade of Aldehydes proceeding via an Iminium-Iminium-Enamine Sequence (Table 1)    | S10        |
| General Procedure for the Organocatalytic Triple Cascade proceeding via enamine – iminium – enamine activation of aldehydes (Table 2) | S14        |
| General Procedure for the Organocatalytic Tandem double Michael additions (enamine – iminium activation sequence) (Table 3)           | S17        |
| <br>                                                                                                                                  |            |
| <b>NMR spectra</b>                                                                                                                    | <b>S21</b> |
| <br>                                                                                                                                  |            |
| <b>HPLC Traces</b>                                                                                                                    | <b>S43</b> |

**General Methods.** The  $^1\text{H}$  and  $^{13}\text{C}$  NMR spectra were recorded at 400 MHz and 100 MHz, respectively. The chemical shifts ( $\delta$ ) for  $^1\text{H}$  and  $^{13}\text{C}$  are given in ppm relative to residual signals of the solvents ( $\text{CHCl}_3$  @ 7.26 ppm  $^1\text{H}$  NMR, 77.0 ppm  $^{13}\text{C}$  NMR). Coupling constants are given in Hz. Carbon types were determined from DEPT  $^{13}\text{C}$  NMR experiments. The following abbreviations are used to indicate the multiplicity: s, singlet; d, doublet; t, triplet; q, quartet; m, multiplet; bs, broad signal. Chromatographic purification of products was accomplished using force-flow chromatography (FC) on silica gel (230-400 mesh) according to the method of Still.<sup>1</sup> For thin layer chromatography (TLC) analysis throughout this work, Merck precoated TLC plates (silica gel 60 GF<sub>254</sub>, 0.25 mm) were used, using UV light as the visualizing agent and an acidic mixture of ceric ammonium molybdate or basic aqueous potassium permanganate ( $\text{KMnO}_4$ ), and heat as developing agents. High-resolution mass spectra (HRMS) were obtained from the ICIQ High Resolution Mass Spectrometry Unit on Waters GCT gas chromatograph coupled time-of-flight mass spectrometer (GC/MS-TOF) with electron ionisation (EI). X-ray data were obtained from the ICIQ X-Ray Unit using a Bruker-Nonius diffractometer equipped with an APPEX 2 4K CCD area detector. Optical rotations are reported as follows:  $[\alpha]_D^{25}$  ( $c$  in g per 100 mL, solvent). All reactions were set up in the air and using undistilled solvent, without any precautions to exclude moisture unless otherwise noted.

**Materials.** Commercial grade reagents and solvents were used without further purification; otherwise, where necessary, they were purified as recommended.<sup>2</sup> Catalysts (*S*) and (*R*)-**A** were purchased from Aldrich and used as received. Chiral primary amine catalysts, 9-Amino(9-deoxy)*epi*-hydroquinine **B** and its *pseudo*-enantiomer 9-Amino(9-deoxy)*epi*-hydroquinidine were prepared from commercially available hydroquinine and hydroquinidine, respectively, following the literature procedure.<sup>3</sup>

$\alpha,\beta$ -unsaturated enones (*E*)-4-(4-chlorophenyl)but-3-en-2-one **7b** and (*E*)-4-(thiophen-3-yl)but-3-en-2-one **7g**, were prepared according to the literature procedure,<sup>4</sup> whereas the enal (*E*)-3-(4-chlorophenyl)acrylaldehyde **2d** was prepared using the Wittig olefination reaction from commercially available 4-chloro benzaldehyde and (triphenylphosphoranylidene)acetaldehyde.

All the other enals **2**, aldehydes **5** and unsaturated ketones **7** were purchased from Aldrich or Alfa Aesar and used as received. 1-benzofuran-2(3H)-one **1** is commercially available.

All the Michael acceptors bearing a benzofuranone moiety (**4**) were prepared according to literature procedures.<sup>5</sup> 3-benzylidenebenzofuran-2(3H)-one **4a** was obtained as a 3:1 mixture of *E/Z* isomer; isolation of the pure *E* isomer has been accomplished by standard chromatography on silica gel.

(*E*)-3-(4-chlorobenzylidene)benzofuran-2(3H)-one, (*E*)-3-(4-nitrobenzylidene)benzofuran-2(3H)-one, and (*E*)-3-butylidenebenzofuran-2(3H)-one were all synthesized as a mixture *E/Z* isomers, and used without further purification.

(*E*)-ethyl 2-(2-oxobenzofuran-3(2H)-ylidene)acetate was synthesized as a single *E* isomer.

<sup>1</sup> W. C. Still, M. Kahn, A. J. Mitra, *J. Org. Chem.* **1978**, *43*, 2923.

<sup>2</sup> W. L. F. Armarengo, D. D. Perrin, In *Purification of Laboratory Chemicals*, 4th ed.; Butterworth Heinemann: Oxford, 1996.

<sup>3</sup> S. H. McCooey, S. J. Connon. *Org. Lett.* **2007**, *9*, 599-602.

<sup>4</sup> K. Zumbansen, A. Döhring, B. List, *Adv. Syn. Cat.* **2010**, *352*, 1135-1138.

<sup>5</sup> M. Msaddek, M. Rammah, K. Ciamala, J. Vebrel, B. Laude, *Synthesis*, **1997**, 1495-1498.

**Determination of Enantiomeric Purity.** HPLC analysis on chiral stationary phase was performed on an Agilent 1200-series instrumentation. Daicel Chiralpak IA or IC columns with i-PrOH/hexane as the eluent were used. HPLC traces were compared to racemic samples prepared by performing the reactions using a 1:1 mixture of (*S*)- and (*R*)-**A** as the catalyst for the synthesis of compounds **3** & **6**. Racemic mixtures for compounds **8** were obtained by mixing the two antipodes obtained performing distinct reactions with catalyst 9-Amino(9-deoxy)*epi*-hydroquinine **B** and the *pseudo*-enantiomer 9-Amino(9-deoxy)*epi*-hydroquinidine.

#### **Determination of Diastereomeric Ratios**

The diastereomeric ratio was determined by <sup>1</sup>H NMR analysis of the crude reaction mixture, and confirmed by HPLC analysis on chiral stationary phase columns.

### **Absolute and Relative Configuration Determination**

#### **X-Ray Structure Analysis.**

The absolute and relative configurations of compound **3d**, **6b**, and **8b** (Scheme 1) were assigned by X-ray crystallographic analysis. CCDC 780474, 781708, 781524, respectively, contain the supplementary crystallographic data for those compounds. These data can be obtained free of charge from the Cambridge Crystallographic Data Centre via [www.ccdc.cam.ac.uk/data\\_request/cif](http://www.ccdc.cam.ac.uk/data_request/cif)

#### **Single Crystal X-ray Diffraction Data for compound 3d (table 1, entry 5):**

X-ray structure determinations: Crystals of compound **3d** were obtained by slow evaporation in a mixture of Hexane and Diethyl-ether in a 1:1 portion at room temperature. The measured crystals were stable under atmosphere conditions; nevertheless they were prepared under inert conditions immersed in perfluoropoly-ether as protecting oil for manipulation.

*Data Collection.* Measurements were made on a Bruker-Nonius diffractometer equipped with an APPEX 2 4K CCD area detector, a FR591 rotating anode with Mo<sub>Kα</sub> radiation, Montel mirrors and a Kryoflex low temperature device (*T* = -173 °C). Full-sphere data collection was used with  $\omega$  and  $\varphi$  scans.

Programs used: Data collection Apex2 V2009 1.0 (Bruker-Nonius 2008), data reduction Saint + Version 7.60A (Bruker AXS 2008) and absorption correction TWINABS.<sup>6</sup>

*Structure Solution.* SIR2007 program was used.<sup>7</sup>

*Structure Refinement.* SHELXTL-97-UNIX VERSION.

<sup>6</sup> TWINABS Version 2008/4 Bruker AXS Blessing, *Acta Cryst.* (1995) A51 33-38

<sup>7</sup> R.Caliandro, B. Carrozzini, G.L.Cascarano, L. De Caro, C. Giacovazzo and D. Siliqi (2007) Advances in ab initio protein phasing by Patterson deconvolution techniques *J. Appl. Cryst.* 40,883-890.

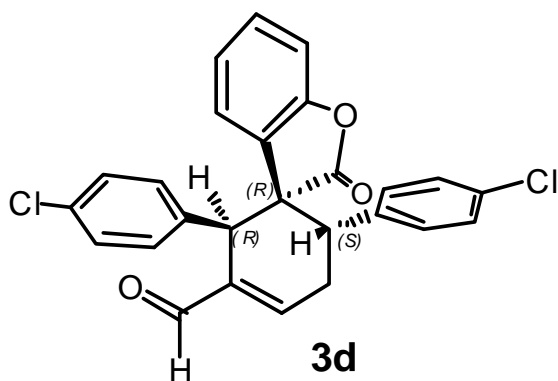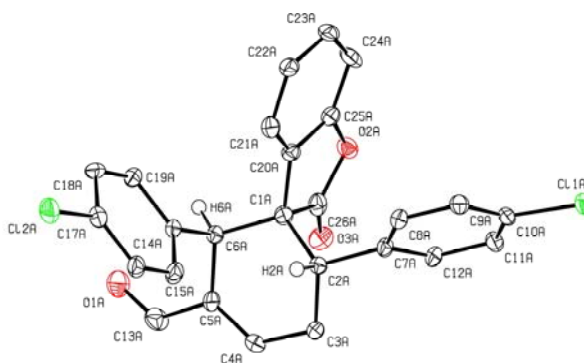

Crystal data for **3d** at 100 K: **CCDC 780474**

|                                    |                                                                |                  |
|------------------------------------|----------------------------------------------------------------|------------------|
| Empirical formula                  | C <sub>26</sub> H <sub>18</sub> Cl <sub>2</sub> O <sub>3</sub> |                  |
| Formula weight                     | 449.30                                                         |                  |
| Temperature                        | 293(2) K                                                       |                  |
| Wavelength                         | 0.71073 Å                                                      |                  |
| Crystal system                     | Triclinic                                                      |                  |
| Space group                        | P1                                                             |                  |
| Unit cell dimensions               | a = 9.3195(10) Å                                               | α = 82.514(4) °. |
|                                    | b = 9.3688(10) Å                                               | β = 88.091(4) °. |
|                                    | c = 26.301(3) Å                                                | γ = 69.752(5) °. |
| Volume                             | 2136.0(4) Å <sup>3</sup>                                       |                  |
| Z                                  | 4                                                              |                  |
| Density (calculated)               | 1.397 Mg/m <sup>3</sup>                                        |                  |
| Absorption coefficient             | 0.330 mm <sup>-1</sup>                                         |                  |
| F(000)                             | 928                                                            |                  |
| Crystal size                       | 0.30 x 0.30 x 0.10 mm <sup>3</sup>                             |                  |
| Theta range for data collection    | 0.78 to 0.78 °.                                                |                  |
| Index ranges                       | -13 ≤ h ≤ 14, -13 ≤ k ≤ 14, -41 ≤ l ≤ 41                       |                  |
| Reflections collected              | 29711                                                          |                  |
| Independent reflections            | 24733 [R(int) = 0.0000]                                        |                  |
| Completeness to theta = 34.63 °    | 0.846 %                                                        |                  |
| Absorption correction              | Empirical                                                      |                  |
| Max. and min. transmission         | 0.9781 and 0.8102                                              |                  |
| Refinement method                  | Full-matrix least-squares on F <sup>2</sup>                    |                  |
| Data / restraints / parameters     | 29711 / 3 / 1118                                               |                  |
| Goodness-of-fit on F <sup>2</sup>  | 1.052                                                          |                  |
| Final R indices [I > 2σ(I)]        | R1 = 0.0845, wR2 = 0.2361                                      |                  |
| R indices (all data)               | R1 = 0.0976, wR2 = 0.2513                                      |                  |
| Absolute Structure Flack parameter | x = 0.03(                                                      |                  |
| Largest diff. peak and hole        | 1.627 and -0.747 e.Å <sup>-3</sup>                             |                  |

The structure refines as a twin made up of two crystal domains with a ratio 71:29. The diffraction measured fraction is low, 0.89, since the reflections of belonging to both crystal domains have been omitted

**Single Crystal X-ray Diffraction Data for compound 6b (table 2, entry 3):**

X-ray structure determinations: Crystals of compound **6b** were obtained by slow evaporation in isopropyl alcohol at 60°C. The measured crystals were stable under atmosphere conditions; nevertheless they were prepared under inert conditions immersed in perfluoropoly-ether as protecting oil for manipulation.

The measured sample is a perfect merohedral twin (twin law 0 1 0 1 0 0 0 -1, basf 0.5).

Programs used: Data collection Apex2 V2009 1.0 (Bruker-Nonius 2008), data reduction Saint + Version 7.60A (Bruker AXS 2008) and absorption correction TWINABS.<sup>6</sup>

*Structure Solution.* SIR2007 program was used.<sup>7</sup>

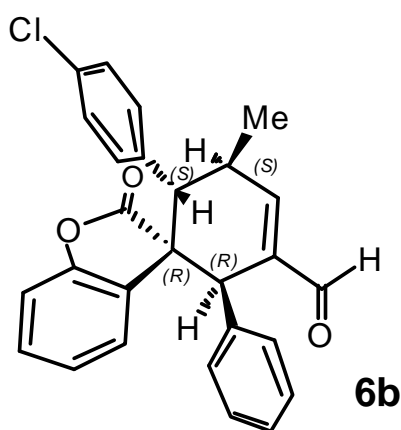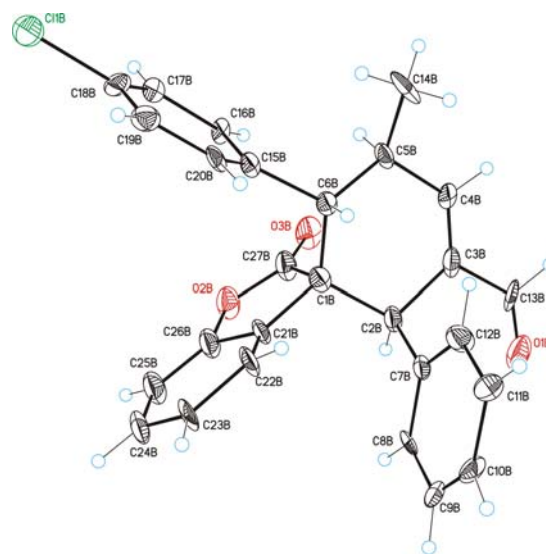

Crystal data for **6b** at 100 K: **CCDC 781708**

|                                 |                                                   |             |
|---------------------------------|---------------------------------------------------|-------------|
| Empirical formula               | C <sub>27</sub> H <sub>21</sub> Cl O <sub>3</sub> |             |
| Formula weight                  | 428.89                                            |             |
| Temperature                     | 100(2) K                                          |             |
| Wavelength                      | 0.71073 Å                                         |             |
| Crystal system                  | Tetragonal                                        |             |
| Space group                     | P4(1)                                             |             |
| Unit cell dimensions            | a = 9.3547(11) Å                                  | α = 90.00 ° |
|                                 | b = 9.3547(11) Å                                  | β = 90.00 ° |
|                                 | c = 51.084(6) Å                                   | γ = 90.00 ° |
| Volume                          | 4470.4(9) Å <sup>3</sup>                          |             |
| Z                               | 8                                                 |             |
| Density (calculated)            | 1.274 Mg/m <sup>3</sup>                           |             |
| Absorption coefficient          | 0.197 mm <sup>-1</sup>                            |             |
| F(000)                          | 1792                                              |             |
| Crystal size                    | 0.40 x 0.30 x 0.15 mm <sup>3</sup>                |             |
| Theta range for data collection | 0.80 to 28.23 °                                   |             |
| Index ranges                    | -12 ≤ h ≤ 9, -7 ≤ k ≤ 12, -63 ≤ l ≤ 67            |             |

|                                    |                                             |
|------------------------------------|---------------------------------------------|
| Reflections collected              | 10668                                       |
| Independent reflections            | 9044 [R(int) = 0.0714 ]                     |
| Completeness to theta =28.23 °     | 0.989 %                                     |
| Absorption correction              | Empirical                                   |
| Max. and min. transmission         | 0.9711 and 0.9255                           |
| Refinement method                  | Full-matrix least-squares on F <sup>2</sup> |
| Data / restraints / parameters     | 10668 / 631 / 562                           |
| Goodness-of-fit on F <sup>2</sup>  | 1.112                                       |
| Final R indices [I>2sigma(I)]      | R1 = 0.1074 , wR2 = 0.2585                  |
| R indices (all data)               | R1 = 0.1222 , wR2 = 0.2669                  |
| Absolute Structure Flack parameter | x =0.08(17)                                 |
| Largest diff. peak and hole        | 0.564 and -0.795 e.Å <sup>-3</sup>          |

### Single Crystal X-ray Diffraction Data for compound **8b** (table 3, entry 3):

X-ray structure determinations: Crystals of compound **8b** were obtained by slow evaporation in methanol at room temperature. The measured crystals were stable under atmosphere conditions; nevertheless they were prepared under inert conditions immersed in perfluoropoly-ether as protecting oil for manipulation.

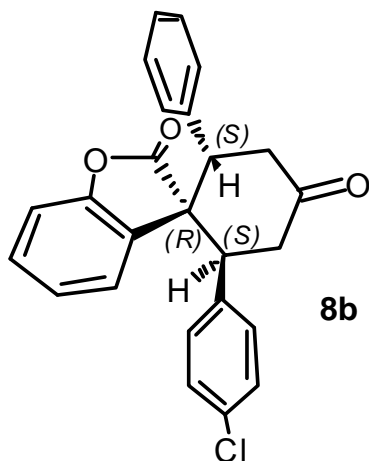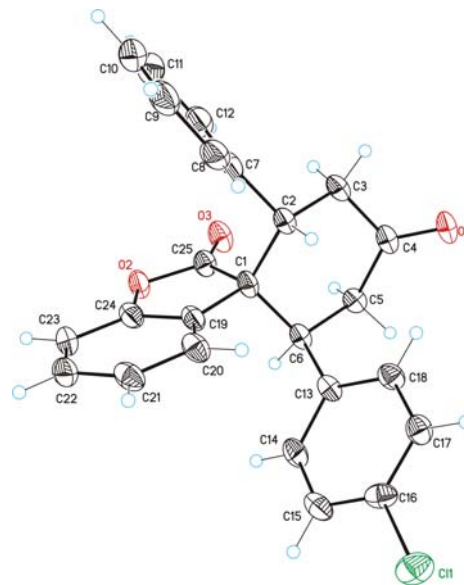

Crystal data for **8b** at 100 K: **CCDC 781524**

Crystallized from Methanol

|                   |                                                   |
|-------------------|---------------------------------------------------|
| Empirical formula | C <sub>25</sub> H <sub>19</sub> Cl O <sub>3</sub> |
| Formula weight    | 402.85                                            |
| Temperature       | 100(2) K                                          |
| Wavelength        | 0.71073 Å                                         |
| Crystal system    | Monoclinic                                        |
| Space group       | P2(1)                                             |

|                                    |                                             |                              |
|------------------------------------|---------------------------------------------|------------------------------|
| Unit cell dimensions               | a = 9.3490(9) Å                             | $\alpha = 90.00^\circ$ .     |
|                                    | b = 6.8640(6) Å                             | $\beta = 100.578(4)^\circ$ . |
|                                    | c = 15.7148(15) Å                           | $\gamma = 90.00^\circ$ .     |
| Volume                             | 991.31(16) Å <sup>3</sup>                   |                              |
| Z                                  | 2                                           |                              |
| Density (calculated)               | 1.350 Mg/m <sup>3</sup>                     |                              |
| Absorption coefficient             | 0.217 mm <sup>-1</sup>                      |                              |
| F(000)                             | 420                                         |                              |
| Crystal size                       | 0.40 x 0.30 x 0.15 mm <sup>3</sup>          |                              |
| Theta range for data collection    | 1.32 to 28.41 °.                            |                              |
| Index ranges                       | -12 <=h<=11 , -8 <=k<=7 , -20 <=l<=20       |                              |
| Reflections collected              | 4166                                        |                              |
| Independent reflections            | 2922 [R(int) = 0.0658 ]                     |                              |
| Completeness to theta =28.41 °     | 0.924 %                                     |                              |
| Absorption correction              | Empirical                                   |                              |
| Max. and min. transmission         | 0.9682 and 0.9183                           |                              |
| Refinement method                  | Full-matrix least-squares on F <sup>2</sup> |                              |
| Data / restraints / parameters     | 4166 / 1 / 262                              |                              |
| Goodness-of-fit on F <sup>2</sup>  | 0.921                                       |                              |
| Final R indices [I>2sigma(I)]      | R1 = 0.0552 , wR2 = 0.1372                  |                              |
| R indices (all data)               | R1 = 0.0958 , wR2 = 0.1601                  |                              |
| Absolute Structure Flack parameter | x = -0.06(10)                               |                              |
| Largest diff. peak and hole        | 0.378 and -0.327 e.Å <sup>-3</sup>          |                              |



## Influence of the compound 4 geometry on the stereochemical outcome of the cascade reactions.

Partial equilibration of the double-bond geometry of 3-benzylidenebenzofuran-2(3H)-one **4a** (bearing a  $\beta$ -phenyl group) has been observed under the catalytic reaction conditions of the cascade processes reported in table 2 and 3 (Figure S1).

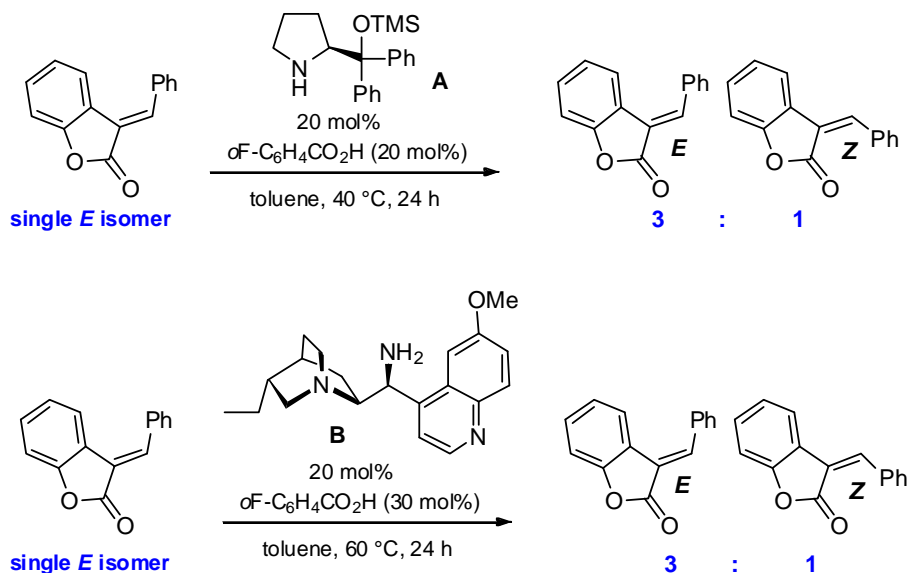

Figure S1. Scrambling Experiments

Notably, using a 3:1 mixture of *E/Z* isomers of compound **4** leads to the same stereochemical outcome as employing geometrically pure *E* isomer (compare entries 1 & 2, Table 2, a single stereoisomer, de and ee >99%).

At the same extent, the stereochemical outcome of cascade reactions depicted in Table 3 is not dependent on the geometry of the starting compound **4**.

The stereo-convergence of the triple cascade depicted in Table 2 might be rationalized on the basis of a reversible first enamine-catalysed Michael addition step between aldehyde **5** and **4**, leading to intermediate **III**: a rapid equilibrium may account for a dynamic kinetic resolution process driven by the perfectly suited matched-pair combination of the chiral iminium ion (generated by condensation of catalyst **B** and enals **2**) and only one out of the possible eight stereoisomers of intermediate **III**. Unfortunately, to date we were not able to isolate this key intermediate.

At present, we cannot rule out a stereo-convergence path driven by a different reactivity of the *E* and *Z* isomers of **4**, where the double-bond geometry scrambling continuously regenerates the fast reacting isomer.

From a synthetic standpoint, the fact that the geometry of the starting material **4** is not reflected into the stereochemistry of the final compounds accounts for a more practical synthetic protocol (a mixture of **4** can be used).

## General Procedure for the Organocatalytic Triple Cascade of Aldehydes proceeding via an Iminium-Iminium-Enamine Sequence (Table 1)

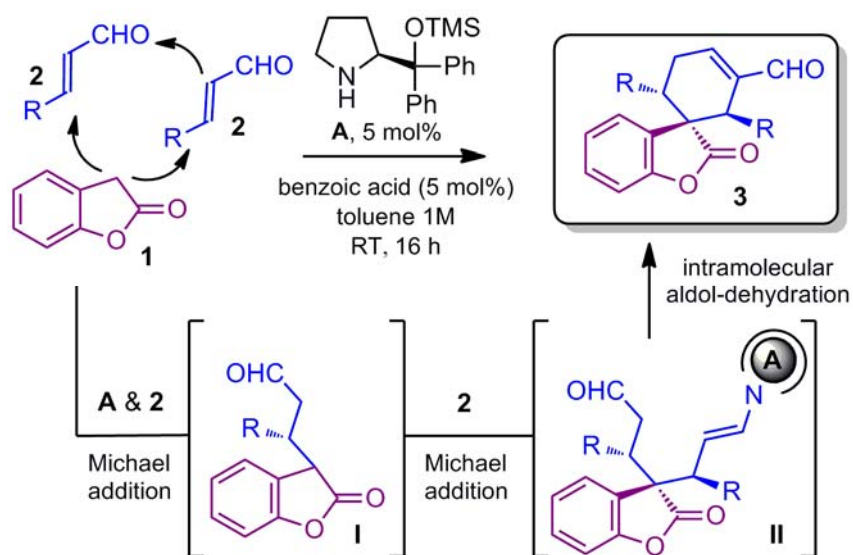

All the reactions were carried out with no precautions to exclude moisture in undistilled toluene. In an ordinary vial equipped with a Teflon-coated stir bar, (*S*)-(-)- $\alpha,\alpha$ -Diphenyl-2-pyrrolidinemethanol trimethylsilyl ether **A** (0.01 mmol, 20  $\mu$ L of a 0.5 M toluene stock solution, 5 mol%) was added to 180  $\mu$ L of toluene. After the addition of benzoic acid (0.01 mmol, 1.2 mg, 5 mol%), the solution was stirred for 5 minutes at room temperature before adding the aldehyde **2** (0.6 mmol, 3 equiv). The mixture was then allowed to stir for 5 minutes further at room temperature before the addition of 2-Cumarone **1** (26.8 mg, 0.2 mmol). The vial was sealed, and the stirring continued at room temperature for 16h. The crude reaction was then flushed through a short plug of silica, using  $\text{CH}_2\text{Cl}_2/\text{Et}_2\text{O}$  1/1 as the eluent. Solvent was removed *in vacuo* and, after NMR analysis to determine the diastereomeric ratio of the process, the residue was purified by flash column chromatography (silica gel) to yield the desired product **3**.

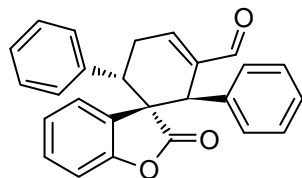

### (1*R*,2*R*,3*S*)-2-oxo-1,3-diphenyl-2*H*-spiro[benzofuran-3,2'-cyclohex[5']ene]-6''-carbaldehyde (**3a** – Table 1, entry 1)

The reaction was carried out following the general procedure to furnish the crude product (d.r. >19:1 determined by  $^1\text{H}$  NMR analysis of the crude mixture).

The title compound was isolated as a white solid by column chromatography

(hexane/diethyl ether = 8/2) in 75% yield and >99% de and ee. HPLC analysis on a Daicel Chiralpak IC column: 80/20 hexane/*i*-PrOH, flow rate 1.00 mL/min,  $\lambda = 215, 254$  nm:  $T_{\text{major}} = 12.9$  min,  $T_{\text{minor}} = 23.1$  min; HRMS *calcd* for ( $\text{C}_{26}\text{H}_{20}\text{O}_3 + \text{Na}$ ): 403.1310, *found* 403.1318.  $[\alpha]_{25}^{\text{D}} = -167.7$  ( $c = 1.00$ ,  $\text{CHCl}_3$ , >99% ee).

$^1\text{H}$  NMR (400 MHz,  $\text{CDCl}_3$ ):  $\delta$  3.01 (td, 1H,  $J_d = 20.5$  Hz,  $J_t = 5.7$  Hz), 3.38-3.49 (m, 1H), 3.65 (dd, 1H,  $J_1 = 11.4$  Hz,  $J_2 = 5.8$  Hz), 4.09 (s, 1H), 5.44 (dd, 1H,  $J_1 = 7.7$  Hz,  $J_2 = 0.9$  Hz), 6.58 (dt, 1H,  $J_t = 7.6$  Hz,  $J_d = 0.9$  Hz), 6.63-6.79 (m, 2H), 6.87-7.06 (m, 6H), 7.08-7.48 (m, 5H), 9.55 (s, 1H).  $^{13}\text{C}$  NMR (400 MHz,

CDCl<sub>3</sub>):  $\delta$  31.3 (CH<sub>2</sub>), 42.4 (CH), 46.0 (CH), 53.5 (C), 109.9 (CH), 122.9 (CH), 126.7 (CH), 127.3 (C), 127.4 (CH), 128.1 (CH), 128.2 (C), 128.2 (CH), 128.4 (CH), 128.7 (CH), 137.7 (CH), 138.8 (CH), 139.3 (C), 150.6 (CH), 152.5 (C), 177.0 (C), 192.2 (CH).

Carrying out the reaction in the presence of 1 mol% of the catalyst A at 40 degrees afforded similar results: full conversion, 68% isolated yield, de & ee >99%

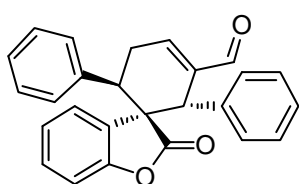

(1''S,2''S,3''R)-2-oxo-1'',3''-diphenyl-2H-spiro[benzofuran-3,2''-cyclohex[5''ene]-6''-carbaldehyde.

The reaction was carried out following the general procedure using (*R*)-(+)- $\alpha,\alpha$ -Diphenyl-2-pyrrolidinemethanol trimethylsilyl ether as catalyst to furnish the crude product (d.r. >19:1 determined by <sup>1</sup>H NMR analysis of the crude mixture).

The title compound was isolated as a white solid by column chromatography (hexane/diethyl ether = 8/2) in 72% yield and >99% ee. HPLC analysis on a Daicel Chiralpak IC column: 80/20 hexane/*i*-PrOH, flow rate 1.00 mL/min,  $\lambda$  = 215, 254 nm:  $\tau =$  *minor* 12.9 min,  $\tau_{major}$  = 23.1 min;  $[\alpha]_{25}^D = +132.9$  ( $c$  = 1.06, CHCl<sub>3</sub>, >99% ee).

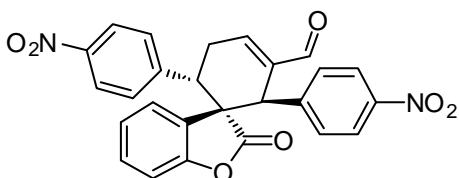

(1''R,2''R,3''S)-1'',3''-bis(4-nitrophenyl)-2-oxo-2H-spiro[benzofuran-3,2''-cyclohex[5''ene]-6''-carbaldehyde (**3b** – Table 1, entry 3).

The reaction was carried out following the general procedure to furnish the crude product (d.r. >19:1 determined by <sup>1</sup>H NMR analysis of the crude mixture). The title compound was isolated as

a yellow solid by column chromatography (hexane/diethyl ether = 6/4) in 59% yield and >99% de and ee. HPLC analysis on a Daicel Chiralpak IC column: 70/30 hexane/*i*-PrOH, flow rate 1.00 mL/min,  $\lambda$  = 215, 254 nm:  $\tau_{major}$  = 45.3 min,  $\tau_{minor}$  = 54.1 min; HRMS *calcd* for (C<sub>26</sub>H<sub>17</sub>N<sub>2</sub>O<sub>7</sub>): 469.1036, *found* 469.1048.  $[\alpha]_{26}^D = -258.5$  ( $c$  = 1.07, CHCl<sub>3</sub>, >99% ee).

<sup>1</sup>H NMR (400 MHz, CDCl<sub>3</sub>):  $\delta$  3.08 (td, 1H,  $J_d$  = 20.5 Hz,  $J_t$  = 5.4 Hz), 3.45-3.53 (m, 1H), 3.66 (dd, 1H,  $J_1$  = 11.3 Hz), 4.21 (s, 1H), 5.50 (dd, 1H,  $J_1$  = 7.6 Hz,  $J_2$  = 0.9 Hz), 6.67 (dt, 1H,  $J_t$  = 7.5 Hz,  $J_d$  0.9 Hz), 6.83-6.95 (m, 2H), 7.04-7.13 (m, 3H), 7.37-7.50 (m, 2H), 7.88-7.92 (m, 2H), 8.00-8.11 (m, 1H), 8.24-8.36 (m, 1H), 9.57 (s, 1H). <sup>13</sup>C NMR (400 MHz, CDCl<sub>3</sub>):  $\delta$  30.8 (CH<sub>2</sub>), 42.5 (CH), 45.6 (CH), 52.6 (C), 111.0 (CH), 123.4 (CH), 123.5 (C), 123.8 (CH), 125.6 (C), 125.8 (CH), 129.2 (CH), 130.0 (CH), 138.6 (C), 144.7 (C), 145.6 (C), 147.4 (C), 147.8 (C), 150.3 (CH), 152.4 (C), 175.8 (C), 191.5 (CH).

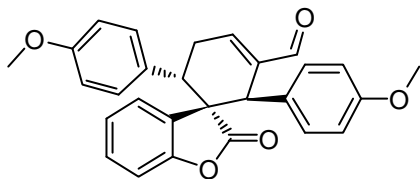

(1''R,2''R,3''S)-1'',3''-bis(4-methoxyphenyl)-2-oxo-2H-spiro[benzofuran-3,2''-cyclohex[5]ene]-6''-carbaldehyde (**3c** – Table 1, entry 4).

The reaction was carried out following the general procedure to furnish the crude product (d.r. >19:1 determined by <sup>1</sup>H NMR analysis of the crude mixture). The title compound was isolated as a pale yellow solid by column chromatography (hexane/diethyl ether = 7/3 ) in 54% yield and >99% de and ee. HPLC analysis on a Daicel Chiralpak IC column: 70/30 hexane/*i*-PrOH, flow rate 1.00 mL/min, λ = 215, 254 nm:  $\tau_{major}$  = 18.0 min,  $\tau_{minor}$  = 38.1 min; HRMS *calcd* for (C<sub>28</sub>H<sub>24</sub>O<sub>5</sub>+Na): 463.1521, *found* 463.1533.  $[\alpha]_{26}^D = -215.1$  (*c* = 1.08, CHCl<sub>3</sub>, >99% ee).

<sup>1</sup>H NMR (400 MHz, CDCl<sub>3</sub>): δ 2.98 (td, 1H,  $J_d = 20.7$  Hz,  $J_t = 5.6 =$  Hz), 3.32-3.44 (m, 1H), 3.58 (dd, 1H,  $J_1 = 11.4$  Hz,  $J_2 = 5.8$  Hz), 3.65 (s, 3H), 3.84 (s, 3H), 4.05 (s, 1H), 5.58 (dd, 1H,  $J_1 = 7.5$  Hz,  $J_2 = 1.0$  Hz), 6.54-6.58 (m, 2H), 6.59-6.78 (m, 3H), 6.80 (d, 1H,  $J = 8.0$ ), 6.83-6.87 (m, 2H), 6.91-6.99 (m, 1H), 7.02 (dt, 1H,  $J_d = 1.3$  Hz,  $J_t = 7.7$  Hz), 7.11-7.22 (m, 1H), 7.34-7.37 (m, 1H), 9.55 (s, 1H). <sup>13</sup>C NMR (400 MHz, CDCl<sub>3</sub>): δ 31.4 (CH<sub>2</sub>), 41.4 (CH), 45.0 (CH), 53.7 (C), 55.0 (CH<sub>3</sub>), 55.3 (CH<sub>3</sub>), 109.8 (CH), 113.4 (C), 113.6 (CH), 122.5 (CH), 126.7 (CH), 127.4 (C), 128.5 (CH), 129.1 (CH), 129.7 (C), 130.7 (C), 139.4 (C), 150.3 (CH), 152.4 (C), 158.5 (C), 159.2 (C), 177.0 (C), 192.2 (CH).

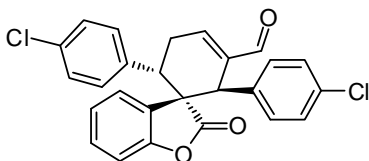

(1''R,2''R,3''S)-1'',3''-bis(4-chlorophenyl)-2-oxo-2H-spiro[benzofuran-3,2''-cyclohex[5]ene]-6''-carbaldehyde (**3d** – Table 1, entry 5).

The reaction was carried out following the general procedure to furnish the crude product (d.r. >19:1 determined by <sup>1</sup>H NMR analysis of the crude mixture). The title compound was isolated as a white solid by column chromatography (hexane/diethyl ether = 7/3 ) in 80% yield and 99% ee. HPLC analysis on a Daicel Chiralpak IC column: 70/30 hexane/*i*-PrOH, flow rate 1.00 mL/min, λ = 215, 254 nm:  $\tau_{major}$  = 10.4 min,  $\tau_{minor}$  = 17.8 min; HRMS *calcd* for (C<sub>26</sub>H<sub>18</sub>Cl<sub>2</sub>O<sub>3</sub>+Na): 471.0531, *found* 471.0535.  $[\alpha]_{25}^D = -198.1$  (*c* = 1.32, CHCl<sub>3</sub>, 99% ee).

<sup>1</sup>H NMR (400 MHz, CDCl<sub>3</sub>): δ 3.01 (td, 1H,  $J_d = 20.4$  Hz,  $J_t = 5.2 =$  Hz), 3.35-3.46 (m, 1H), 3.52 (dd, 1H,  $J_1 = 11.4$  Hz,  $J_2 = 5.7$  Hz), 4.07 (s, 1H), 5.57 (dd, 1H,  $J_1 = 7.7$  Hz,  $J_2 = 1.2$  Hz), 6.55-6.74 (m, 2H), 6.82-6.90 (m, 3H), 7.00-7.04 (m, 3H), 7.07 (dt, 1H,  $J_d = 1.4$  Hz,  $J_t = 8.0$  Hz), 7.12-7.26 (m, 2H), 7.38-7.46 (m, 2H), 9.55 (s, 1H). <sup>13</sup>C NMR (400 MHz, CDCl<sub>3</sub>): δ 31.2 (CH<sub>2</sub>), 41.8 (CH), 45.3 (CH), 53.1 (C), 110.4 (CH), 122.9 (CH), 126.4 (CH), 126.6 (C), 128.5 (CH), 128.7 (CH), 129.2 (CH), 129.5 (CH), 133.4 (C), 134.2 (C), 136.1 (C), 137.1 (C), 139.1 (C), 150.4 (CH), 152.5 (C), 195.5 (CH).

**The absolute configuration of 3d was unambiguously determined by single crystal X-ray analysis, see page S4.**

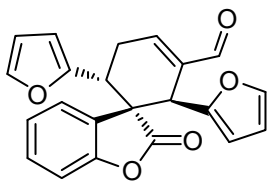

(1'R,2'R,6'R)-2',6'-di(furan-2-yl)-2-oxo-2H-spiro[benzofuran-3,1'-cyclohex[3]ene]-3'-carbaldehyde (**3e** – Table 1, entry 6).

The reaction was carried out following the general procedure to furnish the crude product (d.r. >19:1 determined by  $^1\text{H}$  NMR analysis of the crude mixture). The title compound was isolated as a white solid by column chromatography (hexane/diethyl ether = 7/3) in 49% yield and 99% ee. HPLC analysis on a Daicel Chiralpak IC column: 80/20 hexane/*i*-PrOH, flow rate 1.00 mL/min,  $\lambda = 215, 254$  nm:  $T_{\text{major}} = 15.3$  min,  $T_{\text{minor}} = 24.9$  min; HRMS *calcd* for ( $\text{C}_{22}\text{H}_{16}\text{O}_5 + \text{Na}$ ): 383.0895, *found* 383.0913.  $[\alpha]_{26}^{\text{D}} = -163.9$   $c = 0.84$ ,  $\text{CHCl}_3$ , 99% ee).

$^1\text{H}$  NMR (400 MHz,  $\text{CDCl}_3$ ):  $\delta$  2.96 (td, 1H,  $J_d = 20.9$  Hz,  $J_t = 5.4$  Hz), 3.31-3.42 (m, 1H), 4.06 (dd, 1H,  $J_1 = 11.2$  Hz,  $J_2 = 5.8$  Hz), 4.21 (s, 1H), 5.84 (d, 1H,  $J = 3.2$  Hz), 5.86-5.90 (m, 1H), 6.01 (dd, 1H,  $J_1 = 3.2$  Hz,  $J_2 = 1.8$  Hz), 6.08 (d, 1H,  $J = 3.2$  Hz), 6.35 (dd, 1H,  $J_1 = 3.2$  Hz,  $J_2 = 1.9$  Hz), 6.83 (dt, 1H,  $J_t = 7.6$  Hz,  $J_d = 0.9$  Hz), 6.89 (d, 1H,  $J = 7.9$  Hz), 7.02-7.04 (m, 1H), 7.13 (dt, 1H,  $J_t = 7.6$  Hz,  $J_d = 1.0$  Hz), 7.20-7.24 (m, 1H), 7.37-7.39 (m, 1H), 9.51 (s, 1H).  $^{13}\text{C}$  NMR (400 MHz,  $\text{CDCl}_3$ ):  $\delta$  29.6 ( $\text{CH}_2$ ), 37.0 (CH), 38.9 (CH), 52.0 (C), 107.2 (CH), 110.1 (CH), 110.2 (CH), 110.8 (CH), 110.9 (CH), 123.4 (CH), 125.2 (CH), 127.6 (C), 129.2 (CH), 137.2 (C), 141.9 (CH), 142.1 (CH), 150.2 (CH), 151.4 (C), 152.6 (C), 152.7 (C), 191.7 (CH).

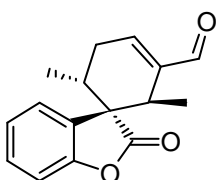

(1'R,2'R,6'R)-2',6'-dimethyl-2-oxo-2H-spiro[benzofuran-3,1'-cyclohex[3]ene]-3'-carbaldehyde (**3f**– Table 1, entry 7).

The reaction was carried out following the general procedure to furnish the crude product (d.r. >19:1 determined by  $^1\text{H}$  NMR analysis of the crude mixture). The title compound was isolated as a yellowish oil by column chromatography (hexane/diethyl ether = 8/2) in 51% yield and 99% ee. HPLC analysis on a Daicel Chiralpak IC column: 80/20 hexane/*i*-PrOH, flow rate 1.00 mL/min,  $\lambda = 215, 254$  nm:  $T_{\text{major}} = 13.3$  min,  $T_{\text{minor}} = 17.5$  min; HRMS *calcd* for ( $\text{C}_{16}\text{H}_{16}\text{O}_3 + \text{Na}$ ): 279.0997, *found* 297.0994.  $[\alpha]_{26}^{\text{D}} = -21.8$  ( $c = 1.40$ ,  $\text{CHCl}_3$ , 99% ee).

$^1\text{H}$  NMR (400 MHz,  $\text{CDCl}_3$ ):  $\delta$  0.74 (d, 3H,  $J = 6.8$  Hz), 1.21 (d, 3H,  $J = 6.9$  Hz), 2.43-2.68 (m, 3H), 2.90 (q, 1H,  $J = 6.9$  Hz), 6.92-6.96 (m, 1H), 7.10-7.22 (m, 3H), 7.30-7.35 (m, 1H), 9.48 (s, 1H).

$^{13}\text{C}$  NMR (400 MHz,  $\text{CDCl}_3$ ):  $\delta$  16.9 ( $\text{CH}_3$ ), 17.2 ( $\text{CH}_3$ ), 29.3 (CH), 32.1 ( $\text{CH}_2$ ), 33.5 (CH), 52.7 (C), 111.0 (CH), 123.7 (CH), 125.7 (CH), 128.9 (C), 129.0 (CH), 142.3 (C), 150.4 (CH), 153.4 (C), 176.6 (C), 193.1 (CH).

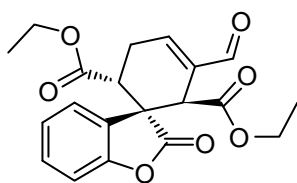

(1'R,2'R,6'R) - diethyl 3'-formyl-2-oxo-2H-spiro [benzofuran-3,1'-cyclohex[3]ene] -2',6'-dicarboxylate (**3g** – Table 1, entry 8).

The reaction was carried out following the general procedure to furnish the crude product (d.r. >19:1 determined by  $^1\text{H}$  NMR analysis of the crude mixture). The title compound was isolated as a colourless oil by column chromatography (hexane/acetone = 8/2 ) in 38% yield and 99% ee. HPLC analysis on a Daicel Chiralpak IA column: 80/20 hexane/*i*-PrOH, flow rate 1.00 mL/min,  $\lambda = 215, 254$  nm:  $\tau_{\text{major}} = 10.9$  min,  $\tau_{\text{minor}} = 13.5$  min; HRMS *calcd* for ( $\text{C}_{20}\text{H}_{20}\text{O}_7 + \text{Na}$ ): 395.1107, *found* 395.1111.  $[\alpha]_{25}^{\text{D}} = -75.5$  ( $c = 1.23$ ,  $\text{CHCl}_3$ , 99% ee).

$^1\text{H}$  NMR (400 MHz,  $\text{CDCl}_3$ ):  $\delta$  0.97 (t, 3,  $J = 7.2$  Hz), 1.10 (t, 3H,  $J = 7.2$  Hz), 3.02 (td, 1H,  $J_d = 20.0$  Hz,  $J_t = 5.7$  Hz), 3.12-3.23 (m, 1H), 3.71 (s, 1H), 3.85-4.04 (m, 4H), 4.08-4.17 (m, 1H), 7.02-7.18 (m, 3H), 7.24-7.27 (m, 1H), 7.37 (dt, 1H,  $J_t = 7.8$  Hz,  $J_d 1.3 =$  Hz), 9.54 (s, 1H).

$^{13}\text{C}$  NMR (400 MHz,  $\text{CDCl}_3$ ):  $\delta$  13.8 ( $\text{CH}_3$ ), 13.9 ( $\text{CH}_3$ ), 27.2 ( $\text{CH}_2$ ), 42.6 (CH), 45.2 (CH), 46.25 (C), 61.5 ( $\text{CH}_2$ ), 61.7 ( $\text{CH}_2$ ), 111.2 (CH), 123.9 (CH), 124.0 (CH), 127.1 (C), 130.2 (CH), 135.7 (C), 150.7 (CH), 153.6 (C), 170.2 (C), 171.4 (C), 174.78 (C), 191.7 (CH).

## General Procedure for the Organocatalytic Triple Cascade proceeding via enamine – iminium – enamine activation of aldehydes (Table 2)

All the reactions were carried out in an ordinary vial equipped with a Teflon-coated stir bar, with no precautions to exclude moisture in undistilled toluene. Catalyst **A** (0.02 mmol, 20 mol %), aldehyde **5** (0.2 mmol) and *o*-fluoro-benzoic acid (20 mol %) were stirred in toluene (0.2 mL) at room temperature for 10 minutes. The cascade was started by adding a solution of benzofuranone derivative **4** (0.15 mmol) and aldehyde **2** (0.1 mmol), dissolved in 0.3 mL of toluene. The vial was sealed and heated up to 40 degree, and stirring was continued till completion of the reaction, as monitored by TLC (generally 48 hours). The crude reaction was then flushed through a short plug of silica, using  $\text{CH}_2\text{Cl}_2/\text{Et}_2\text{O}$  1/1 as the eluent. Solvent was removed *in vacuo* and, after NMR analysis to determine the diastereomeric ratio of the process, the residue was purified by flash column chromatography (silica gel) to yield the desired spiro-compounds **6**.

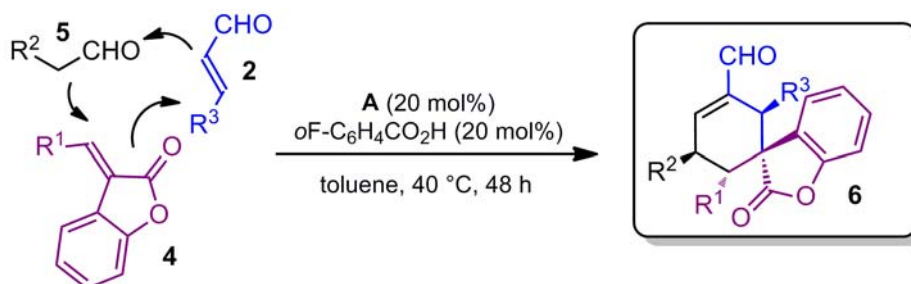

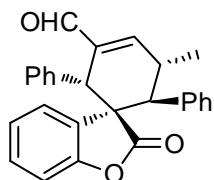

(**6a** - Table 2, entry 1). The reaction was carried out at 40°C following the general procedure to furnish the crude product (d.r. >19:1 determined by  $^1\text{H}$  NMR analysis of the crude mixture). The title compound was isolated as a white solid by column chromatography (hexane/AcOEt = 20/1) in 56% yield and >99% ee. HPLC analysis on a

Daicel Chiralpak IA column: 90/10 hexane/*i*-PrOH, flow rate 1.0 mL/min,  $\lambda = 254$  nm:  $T_{\text{major}} = 7.56$  min,  $T_{\text{minor}} = 11.2$  min. HRMS *calcd* for ( $\text{C}_{27}\text{H}_{22}\text{O}_3 + \text{Na}$ ): 417.1467, *found* 417.1483.  $[\alpha]_{\text{rt}}^{\text{D}} = -180.9$  ( $c = 0.57$ ,  $\text{CHCl}_3$ ).  $^1\text{H}$  NMR (400 MHz,  $\text{CDCl}_3$ ):  $\delta$  1.23 (d,  $J = 7.2$ , 3H), 3.15 (d,  $J = 11.2$ , 1H), 3.53-3.57 (m, 1H), 4.07 (s, 1H), 5.41 (d,  $J = 7.2$ , 1H), 6.57 (t,  $J = 7.2$ , 1H), 6.68 (bs, 1H), 6.74 (d,  $J = 8.4$ , 1H), 6.88-7.02 (m, 6H), 7.17-7.24 (m, 3H), 7.32 (t,  $J = 7.2$ , 1H), 7.42 (bs, 1H), 9.56 (s, 1H).  $^{13}\text{C}$  NMR (100 MHz,  $\text{CDCl}_3$ ):  $\delta$  18.7, 34.9, 46.0, 50.0, 54.3, 109.8, 122.5, 126.7, 127.41, 127.46, 128.1, 128.4, 128.6, 137.9, 138.0, 152.4, 156.1, 177.3, 192.4.

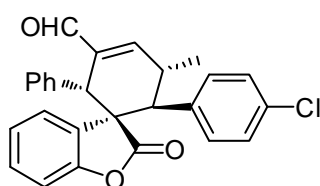

(**6b** - Table 2, entry 3). The reaction was carried out at 40°C following the general procedure to furnish the crude product (d.r. >19:1 determined by  $^1\text{H}$  NMR analysis of the crude mixture). The title compound was isolated as a white solid by column chromatography (hexane/AcOEt = 20/1) in 57% yield and 99%

ee. HPLC analysis on a Daicel Chiralpak IA column: 95/5 hexane/*i*-PrOH, flow rate 1.0 mL/min,  $\lambda = 254$  nm:  $T_{\text{major}} = 10.23$  min,  $T_{\text{minor}} = 19.75$  min. HRMS *calcd* for ( $\text{C}_{27}\text{H}_{21}\text{ClO}_3 + \text{Na}$ ): 451.1077, *found* 451.1089.  $[\alpha]_{\text{rt}}^{\text{D}} = -148.5$  ( $c = 0.76$ ,  $\text{CHCl}_3$ ).  $^1\text{H}$  NMR (400 MHz,  $\text{CDCl}_3$ ):  $\delta$  1.22 (d,  $J = 7.2$ , 3H), 3.13 (d,  $J = 10.4$ , 1H), 3.45-3.53 (m, 1H), 4.06 (s, 1H), 5.38 (d,  $J = 8$ , 1H), 6.59 (t,  $J = 7.6$ , 1H), 6.67 (bs, 1H), 6.77-7.02 (m, 6H), 7.16-7.22 (m, 3H), 7.32 (t,  $J = 7.2$ , 1H), 7.40 (bs, 1H), 9.55 (s, 1H).  $^{13}\text{C}$  NMR (100 MHz,  $\text{CDCl}_3$ ):  $\delta$  18.7, 34.9, 45.9, 49.4, 54.2, 110.1, 122.7, 126.5, 127.1, 127.5, 128.6, 128.9, 133.2, 136.6, 137.4, 137.9, 152.3, 155.5, 177.0, 192.3.

**The absolute configuration of 6b was unambiguously determined by single crystal X-ray analysis, see page S6.**

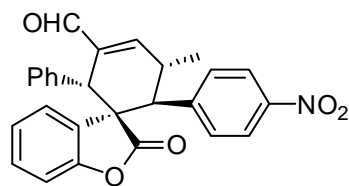

(**6c** - Table 2, entry 4). The reaction was carried out at 40°C following the general procedure to furnish the crude product (d.r. >19:1 determined by  $^1\text{H}$  NMR analysis of the crude mixture). The title compound was isolated as a white solid by column chromatography (hexane/AcOEt = 7/1) in 52% yield

and >99% ee. HPLC analysis on a Daicel Chiralpak IA column: 80/20 hexane/*i*-PrOH, flow rate 1.0 mL/min,  $\lambda = 254$  nm:  $T_{\text{major}} = 7.37$  min,  $T_{\text{minor}} = 13.6$  min. HRMS *calcd* for ( $\text{C}_{27}\text{H}_{21}\text{NO}_5 + \text{Na}$ ): 462.1317, *found* 462.1331.  $[\alpha]_{\text{rt}}^{\text{D}} = -199.9$  ( $c = 0.61$ ,  $\text{CHCl}_3$ ).

$^1\text{H}$  NMR (400 MHz,  $\text{CDCl}_3$ ):  $\delta$  1.23 (d,  $J = 7.2$ , 3H), 3.30 (d,  $J = 10.4$ , 1H), 3.54-3.59 (m, 1H), 4.09 (s, 1H), 5.40 (d,  $J = 8.4$ , 1H), 6.60 (t,  $J = 8$ , 1H), 6.68 (bs, 1H), 6.77 (d,  $J = 8$ , 1H), 6.98-7.23 (m, 6H), 7.34 (t,  $J = 7.2$ , 1H), 7.41 (bs, 1H), 7.88 (d,  $J = 9.6$ , 2H), 9.56 (s, 1H).  $^{13}\text{C}$  NMR (100 MHz,  $\text{CDCl}_3$ ):  $\delta$  18.7, 34.7, 45.9, 50.0, 54.0, 110.3, 122.9, 123.6, 123.7, 126.4, 126.5, 128.3, 129.3, 137.0, 138.0, 145.9, 147.2, 152.2, 154.6, 176.6, 192.1.

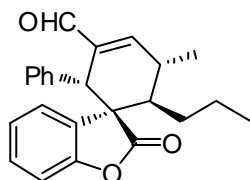

(**6d** - Table 2, entry 5). The reaction was carried out at 40°C following the general procedure to furnish the crude product (d.r. >19:1 determined by <sup>1</sup>H NMR analysis of the crude mixture). The title compound was isolated as a white solid by column chromatography (hexane/AcOEt = 20/1) in 56% yield and >99% ee. HPLC analysis

on a Daicel Chiralpak IA column: 80/20 hexane/*i*-PrOH, flow rate 1.0 mL/min,  $\lambda = 254$  nm:  $T_{major} = 5.06$  min,  $T_{minor} = 6.3$  min. HRMS *calcd* for (C<sub>24</sub>H<sub>24</sub>O<sub>3</sub>+Na): 383.1623, *found* 383.1605.  $[\alpha]_{rt}^D = -148.2$  ( $c = 0.55$ , CHCl<sub>3</sub>). <sup>1</sup>H NMR (400 MHz, CDCl<sub>3</sub>):  $\delta$  0.57 (t,  $J = 8$ , 3H), 0.88-1.14 (m, 4H), 1.46 (d,  $J = 7.6$ , 3H), 2.01-2.06 (m, 1H), 2.96-3.05 (m, 1H), 3.89 (s, 1H), 5.46 (d,  $J = 7.6$ , 1H), 6.73 (t,  $J = 8$ , 1H), 7.05-7.28 (m, 8H), 9.47 (s, 1H). <sup>13</sup>C NMR (100 MHz, CDCl<sub>3</sub>):  $\delta$  14.5, 19.2, 21.2, 33.0, 34.7, 41.3, 45.8, 53.4, 110.2, 122.8, 126.4, 127.8, 128.0, 128.1, 128.9, 137.5, 153.0, 156.7, 177.1, 192.4.

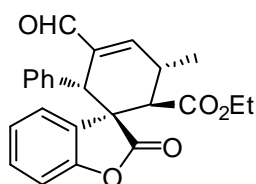

(**6e** - Table 2, entry 6). The reaction was carried out at 40°C following the general procedure to furnish the crude product (d.r. >19:1 determined by <sup>1</sup>H NMR analysis of the crude mixture). The title compound was isolated as a white solid by column chromatography (hexane/AcOEt = 10/1) in 54% yield and >99% ee. HPLC analysis

on a Daicel Chiralpak IA column: 95/5 hexane/*i*-PrOH, flow rate 1.0 mL/min,  $\lambda = 254$  nm:  $T_{major} = 21.48$  min,  $T_{minor} = 22.9$  min. HRMS *calcd* for (C<sub>24</sub>H<sub>22</sub>O<sub>5</sub>+Na): 413.1365, *found* 413.1366.  $[\alpha]_{rt}^D = -97.6$  ( $c = 0.55$ , CHCl<sub>3</sub>). <sup>1</sup>H NMR (400 MHz, CDCl<sub>3</sub>):  $\delta$  0.81 (t,  $J = 7.2$ , 3H), 1.44 (d,  $J = 8$ , 3H), 3.01 (d,  $J = 11.2$ , 1H), 3.43-3.48 (m, 1H), 3.75-3.83 (m, 2H), 3.99 (s, 1H), 5.50 (d,  $J = 8$ , 1H), 6.71 (t,  $J = 8$ , 1H), 7.05-7.09 (m, 3H), 7.19-7.31 (m, 5H), 9.50 (s, 1H). <sup>13</sup>C NMR (100 MHz, CDCl<sub>3</sub>):  $\delta$  13.6, 18.5, 32.2, 45.1, 50.4, 50.6, 61.3, 110.3, 122.9, 126.2, 126.6, 128.22, 128.29, 129.5, 136.7, 137.8, 154.4, 171.2, 192.0.

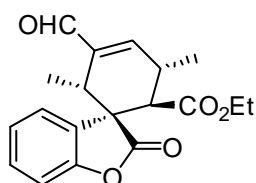

(**6f** - Table 2, entry 7). The reaction was carried out at 40°C following the general procedure to furnish the crude product (d.r. >19:1 determined by <sup>1</sup>H NMR analysis of the crude mixture). The title compound was isolated as a colorless oil by column chromatography (hexane/AcOEt = 10/1) in 70% yield and 95% ee. HPLC analysis on

a Daicel Chiralpak IC column: 80/20 hexane/*i*-PrOH, flow rate 1.0 mL/min,  $\lambda = 254$  nm:  $T_{minor} = 6.55$  min,  $T_{major} = 7.12$  min. HRMS *calcd* for (C<sub>19</sub>H<sub>20</sub>O<sub>5</sub>+Na): 351.1208, *found* 351.1215.  $[\alpha]_{rt}^D = +69.3$  ( $c = 0.61$ , CHCl<sub>3</sub>). <sup>1</sup>H NMR (400 MHz, CDCl<sub>3</sub>):  $\delta$  0.86 (t,  $J = 7.6$ , 3H), 1.21 (d,  $J = 7.2$ , 3H), 1.30 (d,  $J = 7.2$ , 3H), 2.88 (q,  $J = 7.2$ , 1H), 2.99 (d,  $J = 10.8$ , 1H), 3.32-3.37 (m, 1H), 3.79-3.89 (m, 2H), 6.78 (d,  $J = 3.2$ , 1H), 7.08-7.34 (m, 4H), 9.50 (s, 1H). <sup>13</sup>C NMR (100 MHz, CDCl<sub>3</sub>):  $\delta$  13.6, 17.3, 18.5, 32.4, 33.7, 49.9, 50.0, 61.4, 111.0, 123.5, 125.8, 127.5, 129.6, 140.9, 154.1, 171.3, 192.9.



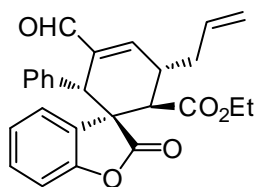

(**6g** - Table 2, entry 8). The reaction was carried out at 40°C following the general procedure to furnish the crude product (d.r. >19:1 determined by <sup>1</sup>H NMR analysis of the crude mixture). The title compound was isolated as a white solid by column chromatography (hexane/AcOEt = 10/1) in 57% yield and >99% ee. HPLC analysis on a Daicel Chiralpak IA column: 90/10 hexane/*i*-PrOH, flow rate 1.0 mL/min, λ = 254 nm : τ<sub>minor</sub> = 12.7 min, τ<sub>major</sub> = 13.22 min. HRMS *calcd* for (C<sub>26</sub>H<sub>24</sub>O<sub>5</sub>+Na): 439.1521, *found* 439.1507. [α]<sub>D</sub><sup>20</sup> = -99.5 (c = 0.77, CHCl<sub>3</sub>).

<sup>1</sup>H NMR (400 MHz, CDCl<sub>3</sub>): δ 0.8 (t, *J* = 7.2, 3H), 2.33-2.41 (m, 1H), 2.65-2.71 (m, 1H), 3.16 (d, *J* = 12, 1H), 3.50-3.56 (m, 1H), 3.78 (q, *J* = 7.2, 2H), 3.97 (s, 1H), 5.30-5.35 (m, 2H), 5.51 (d, *J* = 8.4, 1H), 5.93-6.03 (m, 1H), 6.7(t, *J* = 8, 1H), 7.06 (d, *J* = 7.2, 2H), 7.18-7.31 (m, 6H), 9.50 (s, 1H). <sup>13</sup>C NMR (100 MHz, CDCl<sub>3</sub>): δ 13.5, 36.5, 36.6, 45.1, 48.0, 50.5, 61.3, 110.3, 119.7, 122.9, 126.4, 126.5, 128.20, 128.23, 129.5, 133.6, 136.9, 138.8, 152.2, 153.0, 171.2, 191.9.

### General Procedure for the Organocatalytic Tandem double Michael additions (enamine – iminium activation sequence) (Table 3)

All the reactions were carried out in an ordinary vial equipped with a Teflon-coated stir bar, with no precautions to exclude moisture in undistilled toluene. Catalyst **A** (0.02 mmol, 20 mol %), aldehyde **5** (0.2 mmol) and *o*-fluoro-benzoic acid (20 mol %) were stirred in toluene (0.2 mL) at room temperature for 10 minutes. Catalyst **B** (0.02 mmol, 20 mol %), enone **7** (0.2 mmol) and *o*-fluoro-benzoic acid (30 mol %) were stirred in toluene (0.1 mL) at room temperature for 10 minutes. The cascade was started by adding a solution of benzofuranone derivative **4** (0.15 mmol) dissolved in 1 mL of toluene. The vial was sealed and heated up to 60 degrees, and stirring was continued till completion of the reaction, as monitored by TLC (generally 72 hours). The crude reaction was then flushed through a short plug of silica, using CH<sub>2</sub>Cl<sub>2</sub>/Et<sub>2</sub>O 1/1 as the eluent. Solvent was removed *in vacuo* and, after NMR analysis to determine the diastereomeric ratio of the process, the residue was purified by flash column chromatography (silica gel) to yield the desired spiro-compounds **8**.

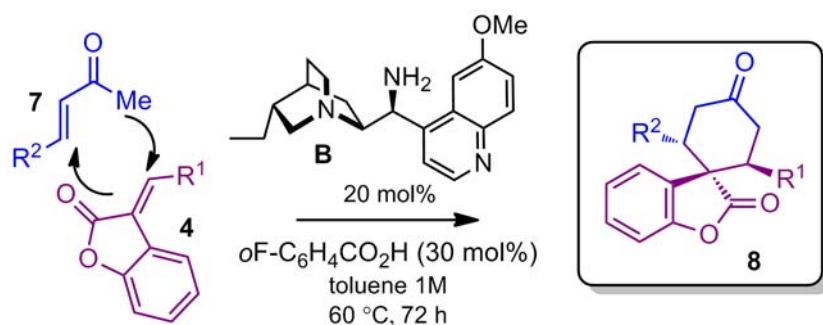

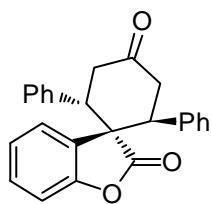

(**8a** - Table 3, entry 1). The reaction was carried out at 60°C following the general procedure to furnish the crude product as a 6.3/1 mixture of diastereoisomers (dr. 6.3:1 determined by integration of  $^1\text{H}$  NMR signal:  $\delta_{minor}$  6.45 d,  $\delta_{major}$  6.06 ppm, d). The title compound was isolated as a white solid by column chromatography (hexane/AcOEt = 90/10) in 70% yield (as a single diastereoisomer) and >99% ee. HPLC analysis on a Daicel Chiralpak IC column: 80/20 hexane/*i*-PrOH, flow rate 1.0 mL/min,  $\lambda$  = 254 nm:  $\tau_{minor}$  = 12.8 min,  $\tau_{major}$  = 15.13 min. HRMS *calcd* for ( $\text{C}_{25}\text{H}_{20}\text{NO}_3+\text{Na}$ ): 391.1310, *found* 391.1329.  $[\alpha]_{\text{rt}}^{\text{D}}$  = -195.8 ( $c$  = 0.76,  $\text{CHCl}_3$ ).  $^1\text{H}$  NMR (400 MHz,  $\text{CDCl}_3$ ):  $\delta$  2.76 (d,  $J$  = 13.2, 1H), 2.95 (dd,  $J$  = 5.2, 16, 1H), 3.61 (dd,  $J$  = 6, 15.6, 1H), 3.68-3.71 (m, 1H), 3.76-3.87 (m, 1H), 6.04 (d,  $J$  = 7.2, 1H), 6.73-6.86 (m, 4H), 6.93-6.96 (m, 2H), 7.03-7.07 (m, 4H), 7.24-7.29 (m, 3H).  $^{13}\text{C}$  NMR (100 MHz,  $\text{CDCl}_3$ ):  $\delta$  41.8, 42.6, 45.9, 47.5, 110.2, 123.1, 126.0, 127.7, 127.9, 128.0, 128.41, 128.49, 129.0, 129.5, 137.3, 139.0, 152.5, 177.9, 209.7.

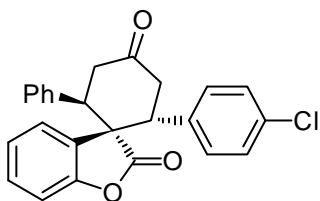

(**8b** - Table 3, entry 3). The reaction was carried out at 60°C following the general procedure to furnish the crude product as a 3.5/1 mixture of diastereoisomers (d.r. 3.5:1 determined by integration of  $^1\text{H}$  NMR signal:  $\delta_{major}$  6.25 d,  $\delta_{minor}$  6.05 ppm, d). The title compound was isolated as a white solid by column chromatography (hexane/AcOEt = 90/10) in 75% yield (as a 3:1 mixture of diastereoisomers) and 97% ee. HPLC analysis on a Daicel Chiralpak IC column: 80/20 hexane/*i*-PrOH, flow rate 1.0 mL/min,  $\lambda$  = 254 nm: Major diastereomer (97% ee):  $\tau_{minor}$  = 13.91 min,  $\tau_{major}$  = 14.86 min; Minor diastereomer (>99% ee):  $\tau_{minor}$  = 13.20 min,  $\tau_{major}$  = 16.29 min. HRMS *calcd* for ( $\text{C}_{25}\text{H}_{19}\text{ClO}_3+\text{Na}$ ): 425.0920, *found* 425.0937.  $[\alpha]_{\text{rt}}^{\text{D}}$  = -155.7 ( $c$  = 0.78,  $\text{CHCl}_3$ , dr 3.5:1, 97% ee<sub>major</sub>, >99% ee<sub>minor</sub>).  $^1\text{H}$  NMR (400 MHz,  $\text{CDCl}_3$ ):  $\delta$  2.73-2.79 (m, 1H), 2.91-2.97 (m, 1H), 2.53-2.67 (m, 3H), 3.54 (dd,  $J$  = 6.12, 16.2, 1H), 3.67-3.85 (m, 4H), 6.03 (d,  $J$  = 7.6, 1H minor), 6.23 (d,  $J$  = 8, 1H major), 6.74-6.93 (m, 8H), 7.0-7.10 (m, 5H), 7.21-7.27 (m, 3H).  $^{13}\text{C}$  NMR (100 MHz,  $\text{CDCl}_3$ ):  $\delta$  41.6, 41.7, 42.4, 42.5, 45.3, 46.0, 46.7, 47.4, 55.2, 55.3, 110.45, 110.46, 123.3, 123.4, 125.7, 125.8, 127.62, 127.69, 127.8, 128.0, 128.1, 128.4, 128.5, 128.62, 128.65, 129.27, 129.29, 129.3, 129.4, 130.7, 133.9, 135.8, 136.9, 137.4, 152.5, 177.6, 177.7, 209.1, 209.3.

**The absolute configuration of 8b was unambiguously determined by single crystal X-ray analysis, see page S7.**

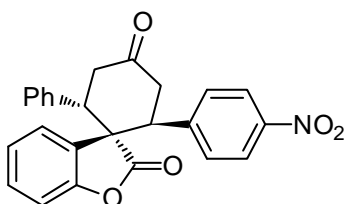

(**8c** - Table 3, entry 4). The reaction was carried out at 60°C following the general procedure to furnish the crude product as a 2/1 mixture of diastereoisomers (d.r. 2:1 determined by integration of  $^1\text{H}$ -NMR signal:  $\delta_{major}$  6.46 d,  $\delta_{minor}$  6.08 ppm, d). The title compound was isolated as a white solid by column chromatography (hexane/AcOEt = 7/1) in 82% yield (as a 2:1 mixture of diastereoisomers) and 98% ee. HPLC analysis on a Daicel Chiralpak IA column: 80/20 hexane/*i*-PrOH, flow rate 1.0 mL/min,  $\lambda$  = 254 nm: Major diastereomer (98% ee):  $\tau_{major}$  = 13.29 min,  $\tau_{minor}$  = 16.33

min; Minor diastereomer can't be separated. HRMS *calcd* for (C<sub>25</sub>H<sub>19</sub>NO<sub>5</sub>+Na): 436.1161, *found* 436.1173. [α]<sub>D</sub><sup>20</sup> = -240.2 (*c* = 0.8, CHCl<sub>3</sub>, dr 2:1, 98% ee<sub>major</sub>).

<sup>1</sup>H NMR (400 MHz, CDCl<sub>3</sub>): δ 2.75-2.82 (m, 1H), 2.97 (dd, *J* = 4.76, 16.2, 1H, minor), 3.07 (dd, *J* = 7.76, 16.56, 1H, major), 3.62 (dd, *J* = 6.4, 16, 1H, major), 3.45 (dd, *J* = 5.6, 16.32, 1H, minor), 3.69-3.73 (m, 2H), 3.78-3.96 (m, 4H), 6.05 (d, *J* = 8, 1H, minor), 6.42 (d, *J* = 8, 1H, major), 6.73-6.93 (m, 7H), 7.02-7.05 (m, 8H), 7.24-7.30 (m, 3H), 7.90 (d, *J* = 8.4, 2H, minor), 8.09 (d, *J* = 8.8, 2H, major). <sup>13</sup>C NMR (100 MHz, CDCl<sub>3</sub>): δ 41.1, 41.6, 42.0, 42.1, 45.6, 46.3, 46.7, 47.5, 54.9, 55.6, 110.6, 110.8, 123.5, 123.62, 123.64, 123.8, 125.0, 125.8, 127.0, 127.3, 128.0, 128.1, 128.3, 128.5, 128.6, 129.1, 129.5, 129.6, 129.7, 130.1, 138.4, 144.7, 145.9, 152.4, 152.5, 177.4, 208.3, 208.6.

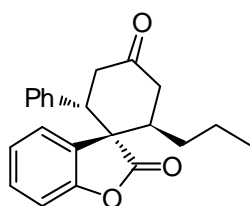

(**8d** - Table 3, entry 5). The reaction was carried out at 60°C following the general procedure to furnish the crude product as a single diastereoisomer. The title compound was isolated as a white solid by preparative TLC (toluene/AcOEt = 100/1) in 40% yield (as a single diastereoisomer) and 91% ee. HPLC analysis on a Daicel Chiralpak IA column: 80/20 hexane/*i*-PrOH, flow rate 1.0 mL/min, λ = 254 nm: *T*<sub>minor</sub>

= 5.67 min, *T*<sub>major</sub> = 6.23 min; HRMS *calcd* for (C<sub>22</sub>H<sub>22</sub>O<sub>3</sub>+Na): 357.1467, *found* 357.1456. [α]<sub>D</sub><sup>20</sup> = -118.2 (*c* = 0.55, CHCl<sub>3</sub>, dr 1.5:1, 98% ee<sub>major</sub>, 88% ee<sub>minor</sub>).

<sup>1</sup>H NMR (400 MHz, CDCl<sub>3</sub>): δ 0.78 (t, *J* = 7.2, 3H), 1.03-1.12 (m, 1H), 1.25-1.43 (m, 3H), 2.53-2.67 (m, 3H), 3.07 (dd, *J* = 4, 15.6, 1H), 3.55-3.65 (m, 2H), 6.78-6.81 (m, 2H), 6.89 (d, *J* = 8, 1H), 7.07-7.28 (m, 5H), 7.39 (d, *J* = 8, 1H). <sup>13</sup>C NMR (100 MHz, CDCl<sub>3</sub>): δ 13.9, 20.4, 33.3, 40.5, 42.0, 47.2, 55.8, 110.9, 124.0, 124.9, 127.8, 128.0, 128.3, 128.4, 129.0, 129.3, 137.0, 153.0, 178.1, 209.9.

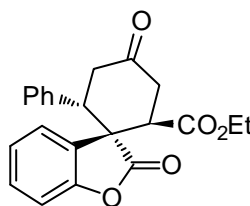

(**8e** - Table 3, entry 6). The reaction was carried out at 60°C following the general procedure to furnish the crude product as a 2.2/1 mixture of diastereoisomers (d.r. 2.2:1 determined by HPLC). The title compound was isolated as a white solid by column chromatography (hexane/AcOEt = 10/1) in 77% yield (as a 2.2:1 mixture of diastereoisomers) and 85% ee. HPLC analysis on a Daicel Chiralpak IA column:

90/10 hexane/*i*-PrOH, flow rate 1.0 mL/min, λ = 254 nm: Major diastereomer (85% ee): *T*<sub>major</sub> = 16.35 min, *T*<sub>minor</sub> = 17.45 min; Minor diastereomer (>99% ee): *T*<sub>major</sub> = 14.7 min, HRMS *calcd* for (C<sub>22</sub>H<sub>20</sub>O<sub>5</sub>+Na): 387.1208, *found* 428.1225. [α]<sub>D</sub><sup>20</sup> = -57.2 (*c* = 0.58, CHCl<sub>3</sub>).

<sup>1</sup>H NMR (400 MHz, CDCl<sub>3</sub>): δ 1.0 (t, *J* = 7.2, 3H), 2.63-2.68 (m, 1H), 2.80-2.86 (m, 1H), 3.32 (dd, *J* = 5.6, 16, 1H), 3.42-3.63 (m, 2H), 6.75-6.91 (m, 3H), 7.06-7.29 (m, 6H). <sup>13</sup>C NMR (100 MHz, CDCl<sub>3</sub>): δ 13.73, 13.76, 38.3, 39.6, 41.9, 42.2, 46.4, 46.6, 50.60, 50.61, 52.3, 52.5, 61.6, 61.8, 110.6, 110.7, 122.2, 123.9, 124.1, 124.4, 127.9, 128.0, 128.2, 128.40, 128.44, 129.4, 129.8, 136.2, 136.3, 153.0, 153.2, 170.0, 170.8, 175.7, 176.7, 206.2, 207.2.

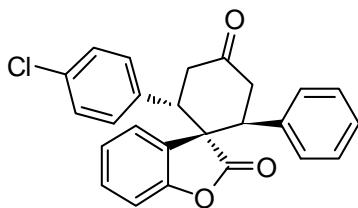

(**8f** - Table 3, entry 7). The reaction was carried out at 60°C following the general procedure to furnish the crude product as a 4/1 mixture of diastereoisomers (d.r. 3.5:1 determined by integration of  $^1\text{H}$  NMR signal:  $\delta_{\text{major}}$  6.05 d,  $\delta_{\text{minor}}$  6.24 ppm. d). The title compound was isolated as a white solid by column chromatography (hexane/AcOEt = 85/15) in 85%

yield (as a 3.4:1 mixture of diastereoisomers) and 97% ee. HPLC analysis on a Daicel Chiralpak IC column: 8/2 hexane/*i*-PrOH, flow rate 1.0 mL/min,  $\lambda = 254$  nm: Major diastereomer (97% ee):  $\tau_{\text{minor}} = 12.9$  min,  $\tau_{\text{major}} = 15.9$  min; Minor diastereomer (96% ee):  $\tau_{\text{minor}} = 13.5$  min,  $\tau_{\text{major}} = 14.5$  min. HRMS *calcd* for ( $\text{C}_{25}\text{H}_{19}\text{Cl O}_3 + \text{Na}$ ): 425.0920, *found* 425.0938.  $[\alpha]_{\text{rt}}^{\text{D}} = -130.6$  ( $c = 1.07$ ,  $\text{CHCl}_3$ , dr 4:1, 97% ee<sub>major</sub>, 96% ee<sub>minor</sub>).

$^1\text{H}$  NMR (400 MHz,  $\text{CDCl}_3$ ):  $\delta$  2.71-2.84 (m, 1H), 2.91-3.01 (m, 1H), 3.53-3.88 (m, 4H), 6.05 (d, 1H,  $J = 7.5$  Hz major), 6.24 (d, 1H,  $J = 7.5$  Hz minor), 6.75-6.98 (m, 6H), 7.01-7.13 (m, 3H), 7.22-7.34 (m, 3H) ppm.

$^{13}\text{C}$  NMR (100 MHz,  $\text{CDCl}_3$ ):  $\delta$  41.7 ( $\text{CH}_2$ ), 42.5 ( $\text{CH}_2$ ), 45.3 (CH), 47.5 (CH), 55.3 (C), 110.5 (CH), 123.3 (CH), 125.8 (CH), 127.6 (C), 128.0 (CH), 128.1 (CH), 128.5 (CH), 128.6 (C), 128.6 (C), 128.7 (C), 129.3 (CH), 129.4 (CH), 129.5 (CH), 130.8 (C), 133.7 (C), 135.9 (C), 138.8 (C), 152.5 (C), 177.7 (C), 209.2 (C) ppm.

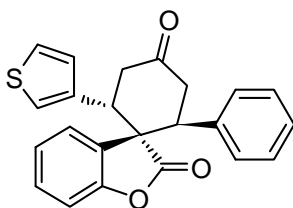

(**8g** - Table 3, entry 8). The reaction was carried out at 60°C following the general procedure to furnish the crude product as a 4/1 mixture of diastereoisomers (d.r. 4:1 determined by integration of  $^1\text{H}$ -NMR signal:  $\delta_{\text{major}}$  6.02 d,  $\delta_{\text{minor}}$  6.07 ppm. d). The title compound was isolated as a white solid by column chromatography (hexane/Acetone = 95/5) in 91% yield (as a 4:1 mixture

of diastereoisomers) and 96% ee. HPLC analysis on a Daicel Chiralpak IA column: 95/5 hexane/*i*-PrOH, flow rate 1.0 mL/min,  $\lambda = 254$  nm: Major diastereomer (96% ee):  $\tau_{\text{minor}} = 18.7$  min,  $\tau_{\text{major}} = 24.4$  min; Minor diastereomer (93% ee):  $\tau_{\text{minor}} = 17.3$  min,  $\tau_{\text{major}} = 19.6$  min.  $[\alpha]_{\text{rt}}^{\text{D}} = -99.1$  ( $c = 0.78$ ,  $\text{CHCl}_3$ , dr 4:1, 96% ee<sub>major</sub>, 93% ee<sub>minor</sub>).

$^1\text{H}$  NMR (400 MHz,  $\text{CDCl}_3$ ):  $\delta$  2.72-2.95 (m, 2H), 3.54-3.84 (m, 4H), 3.94 (dd, 1H,  $J_1 = 13.7$ ,  $J_2 = 4.2$  Hz), 6.02 (d, 1H,  $J = 7.5$  Hz major), 6.07 (d, 1H,  $J = 7.5$  Hz minor), 6.47 (dd, 1H,  $J_1 = 5.2$ ,  $J_2 = 1.4$  Hz), 6.70-6.73 (m, 1H), 6.75-6.88 (m, 2H), 6.91-6.94 (m, 2H), 6.99 (dd, 1H,  $J_1 = 4.9$ ,  $J_2 = 2.9$  Hz), 7.02-7.16 (m, 2H), 7.26-7.30 (m, 2H) ppm.

$^{13}\text{C}$  NMR (100 MHz,  $\text{CDCl}_3$ ):  $\delta$  41.5 (CH), 41.8 ( $\text{CH}_2$ ), 42.9 ( $\text{CH}_2$ ), 47.3 (CH), 55.1 (C), 110.4 (CH), 122.9 (CH), 123.3 (CH), 125.7 (C), 125.8 (CH), 125.9 (CH), 126.8 (CH), 128.0 (C), 128.1 (CH), 128.5 (CH), 128.6 (CH), 129.1 (CH), 129.5 (CH), 138.2 (C), 139.1 (C), 139.7 (C), 152.8 (C), 177.9 (C), 209.3 (C) ppm.

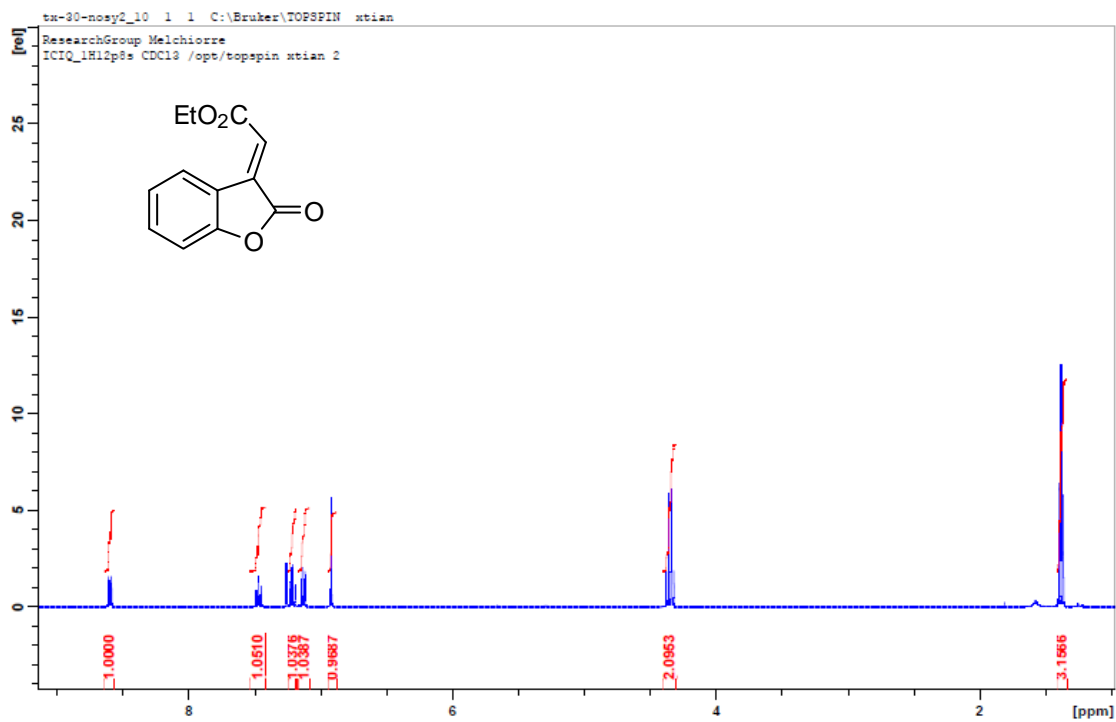

1.38 (t,  $J = 7.2$ , 3H), 4.35 (q,  $J = 7.2$ , 2H), 6.92 (s, 1H), 7.13 (d,  $J = 8$ , 1H), 7.21 (td,  $J = 0.92$ , 7.6, 1H), 7.47 (td,  $J = 1.48$ , 7.8, 1H), 8.60 (d,  $J = 7.6$ , 1H)ppm

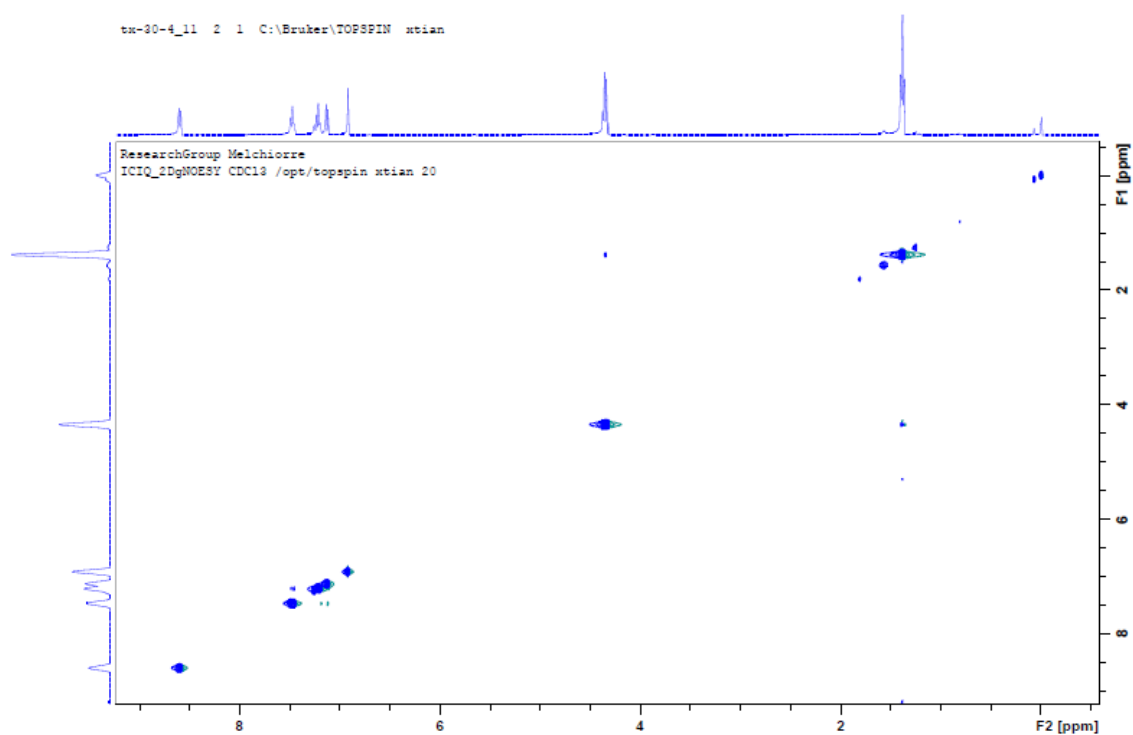

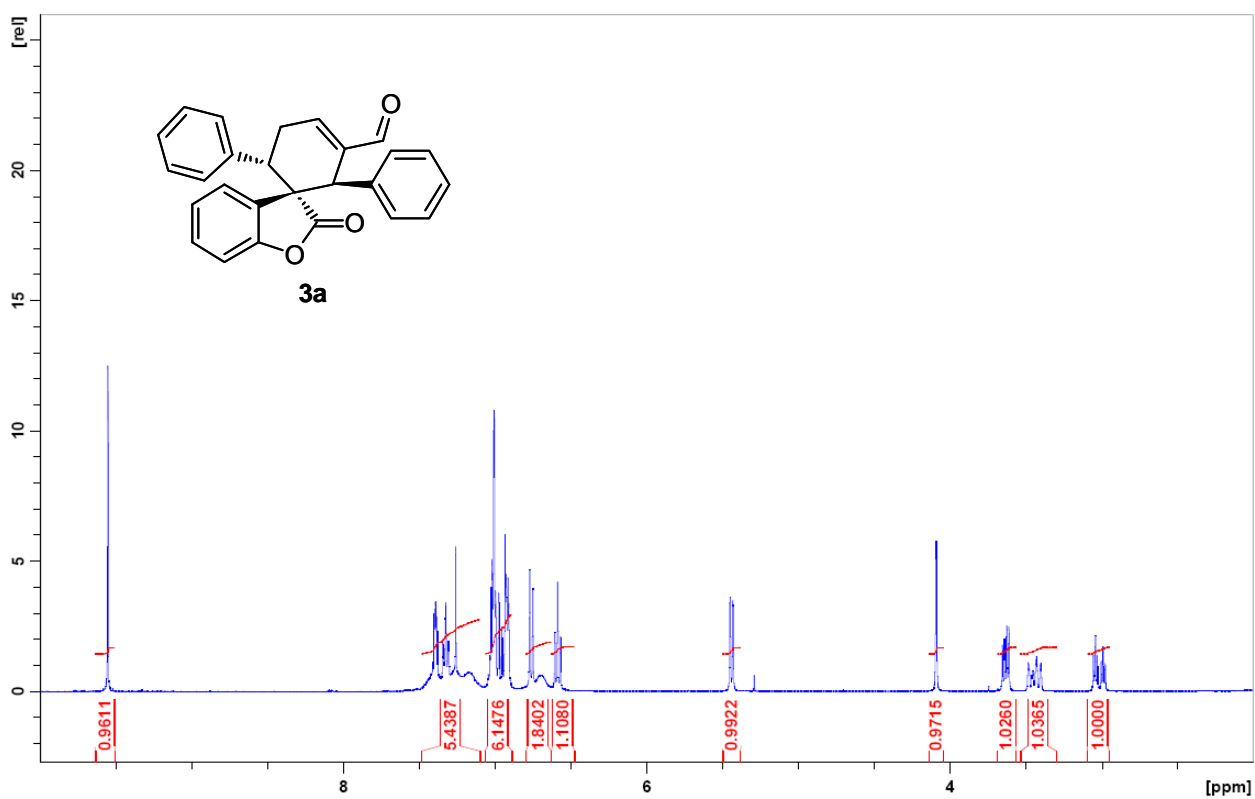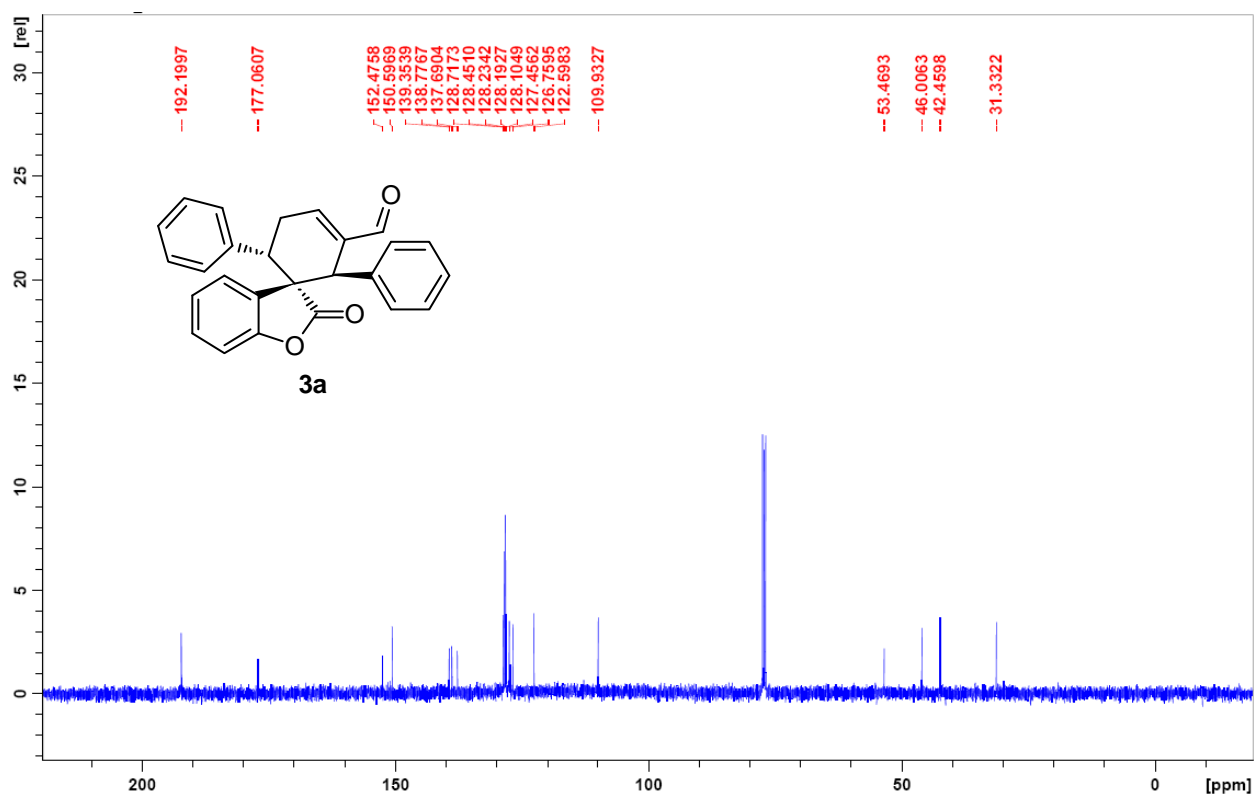

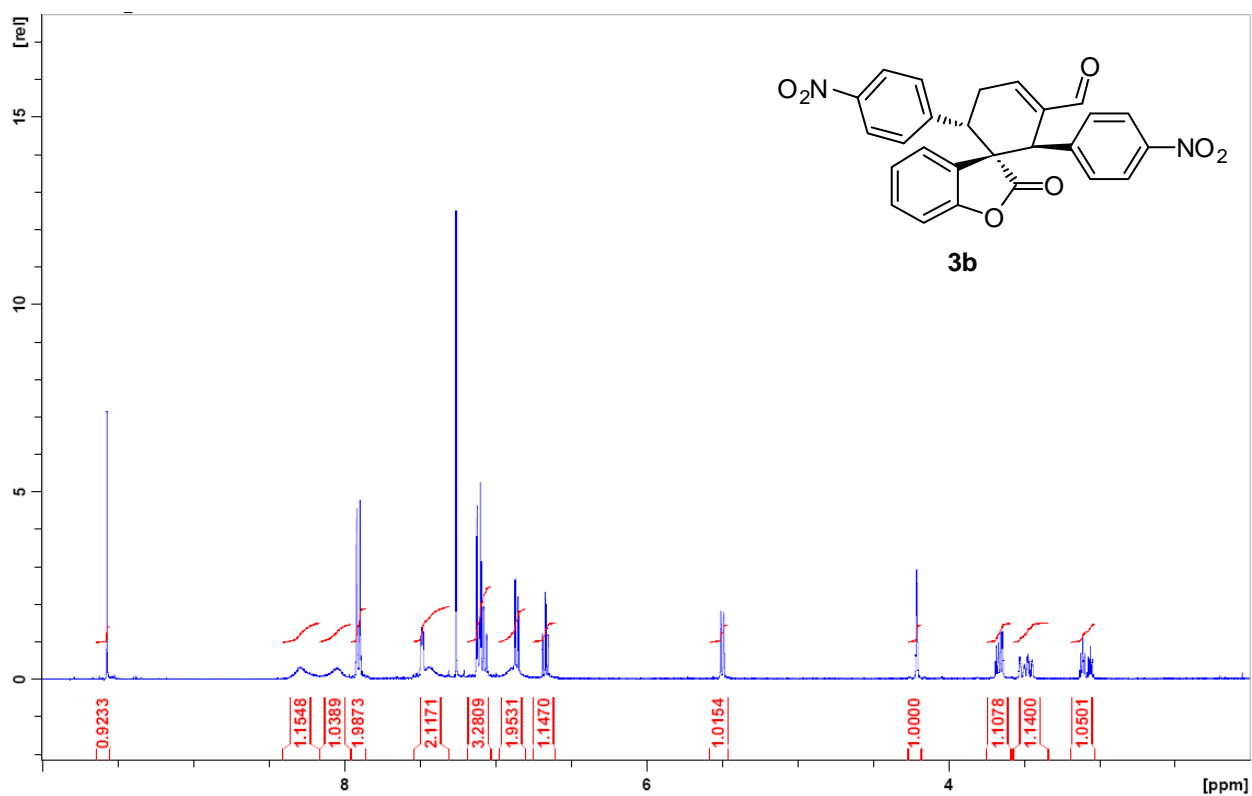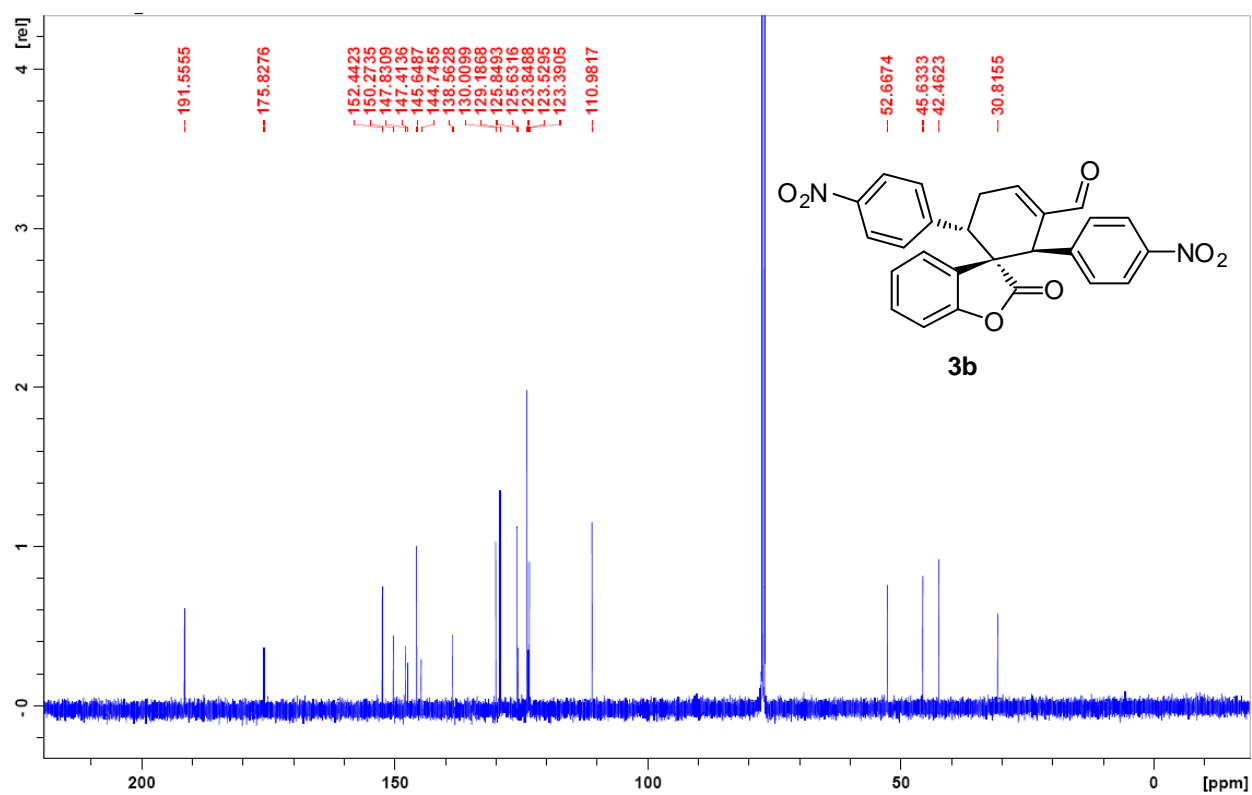

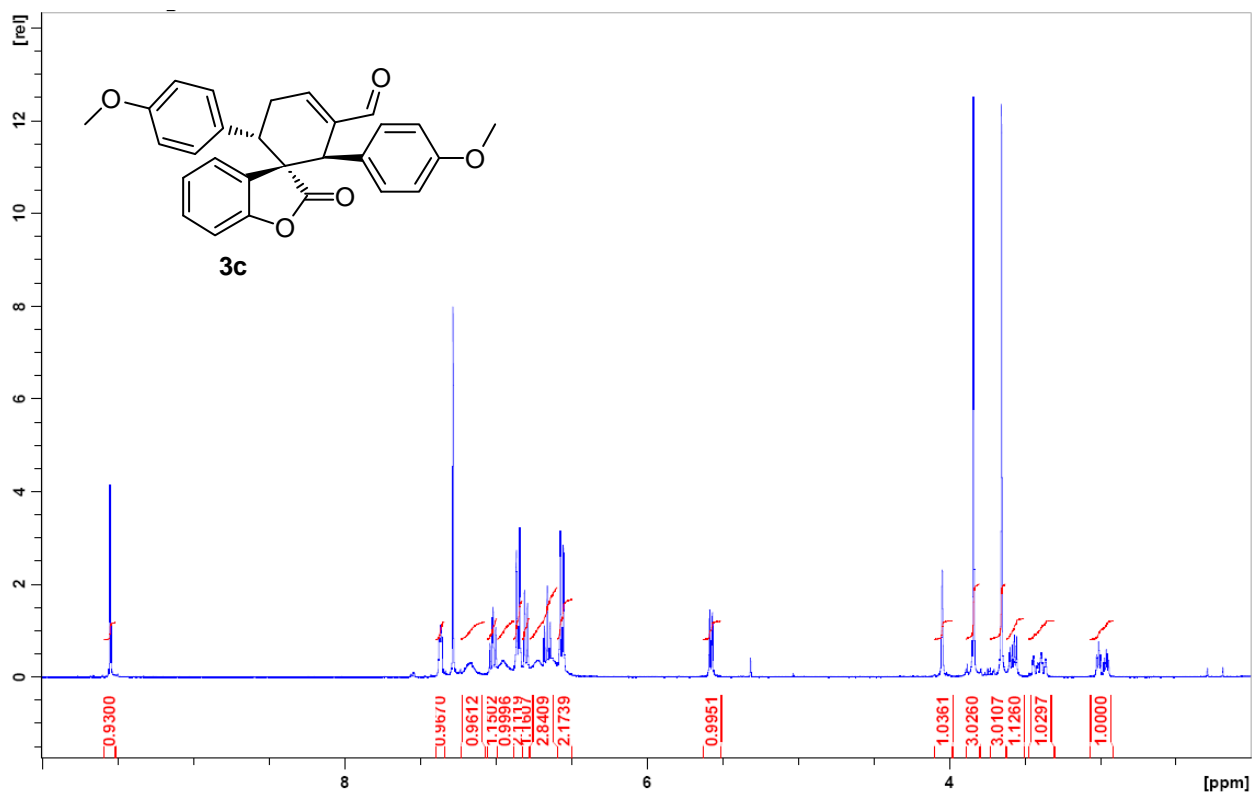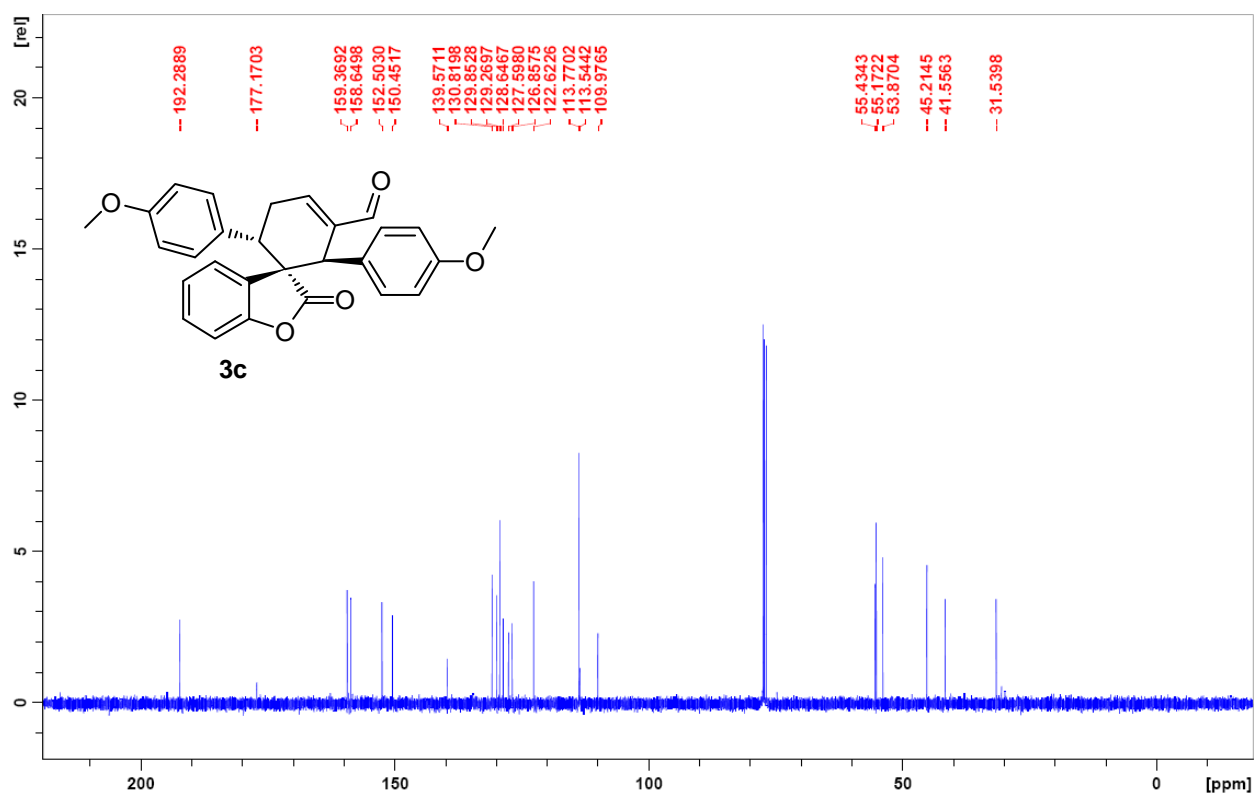



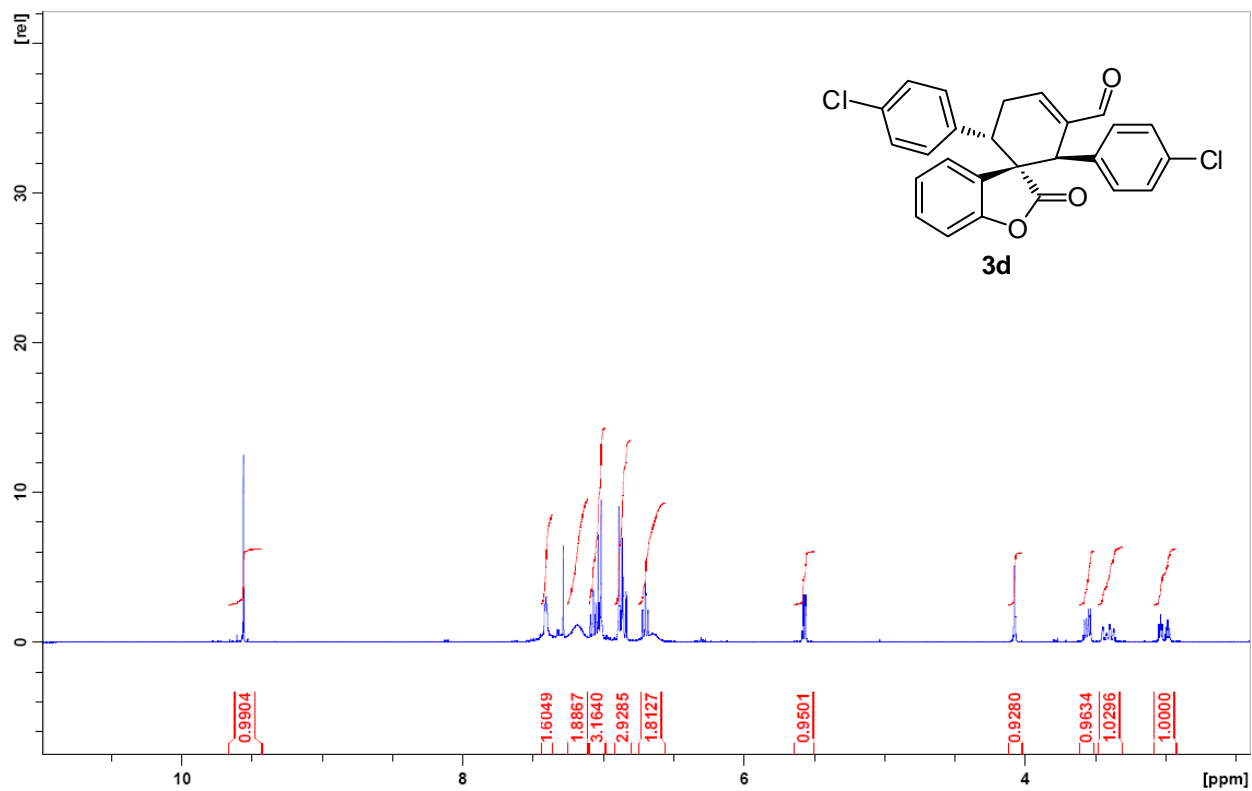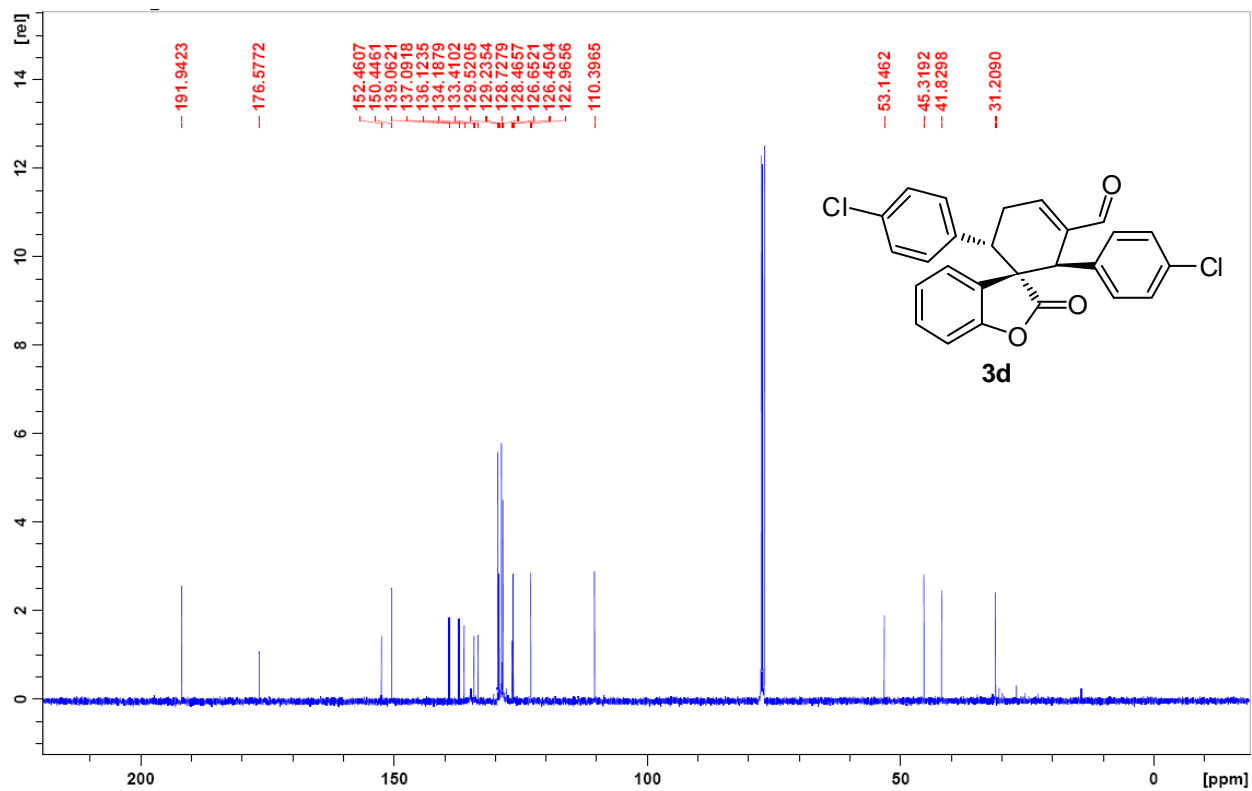

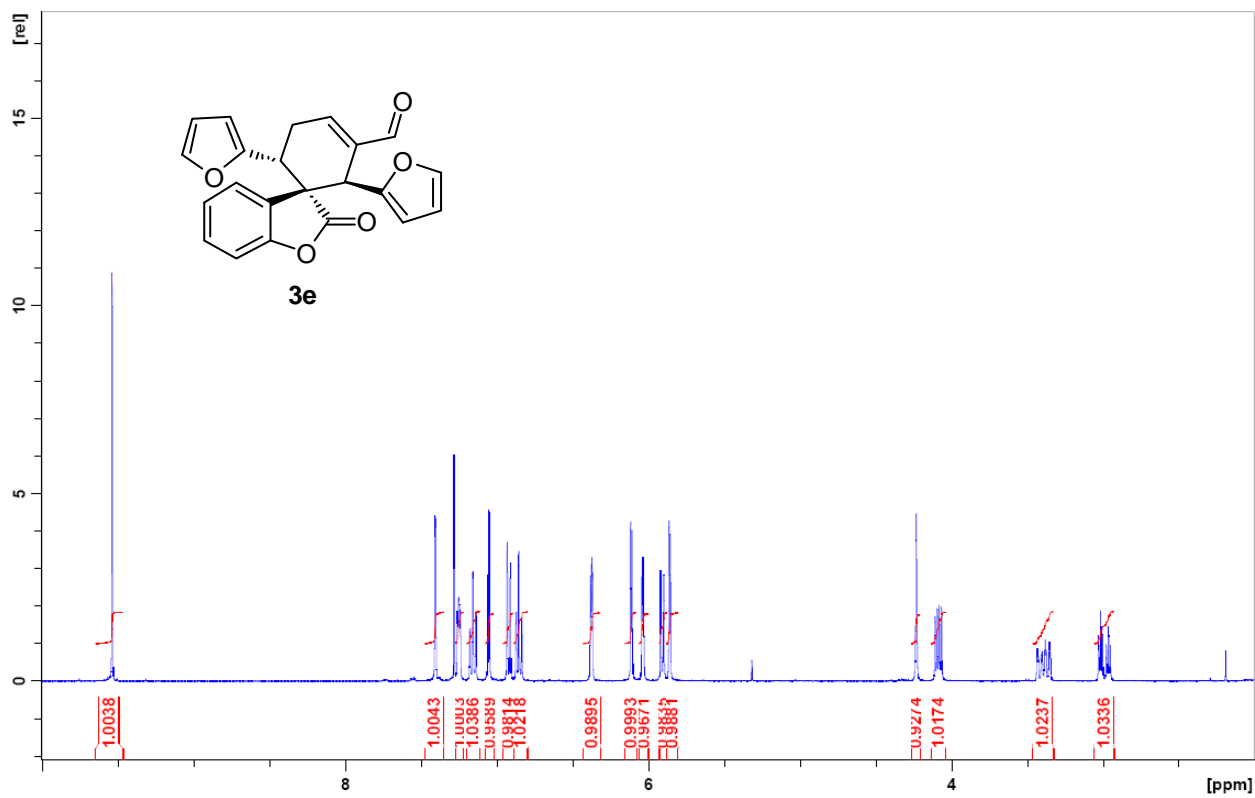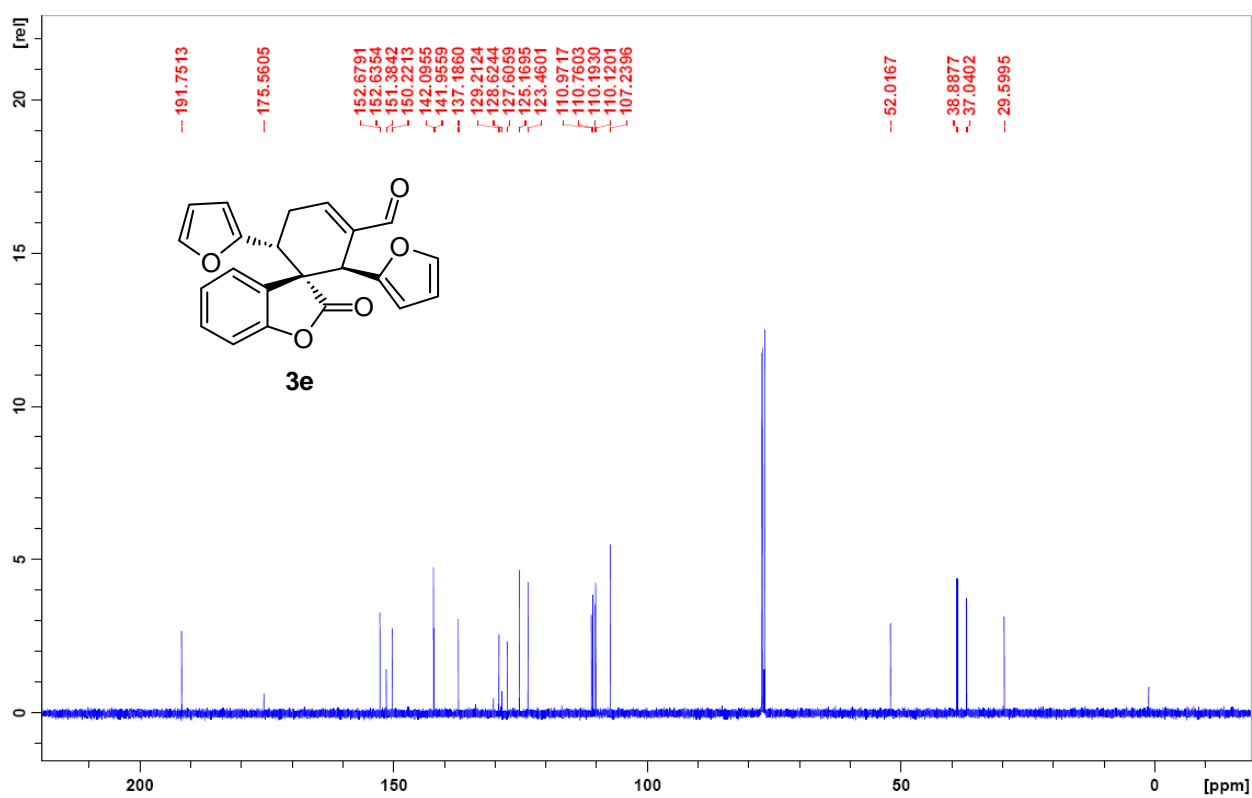

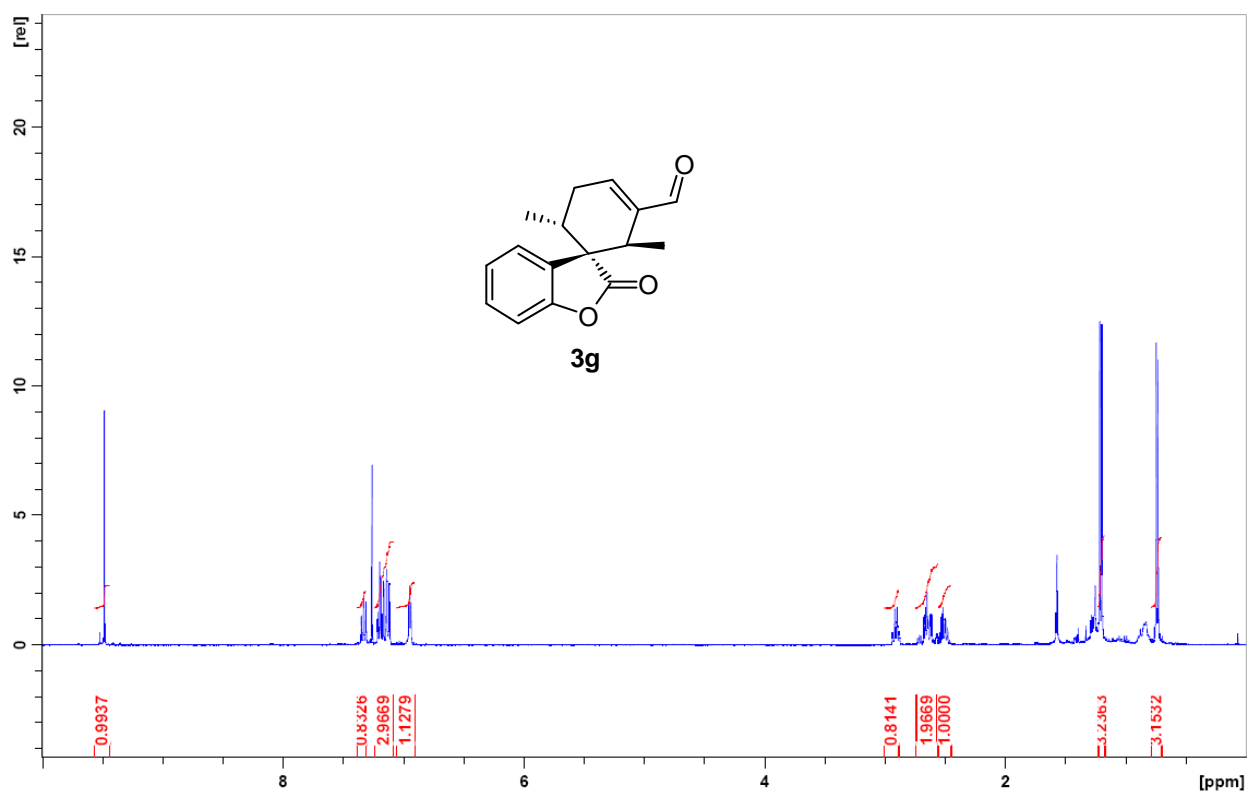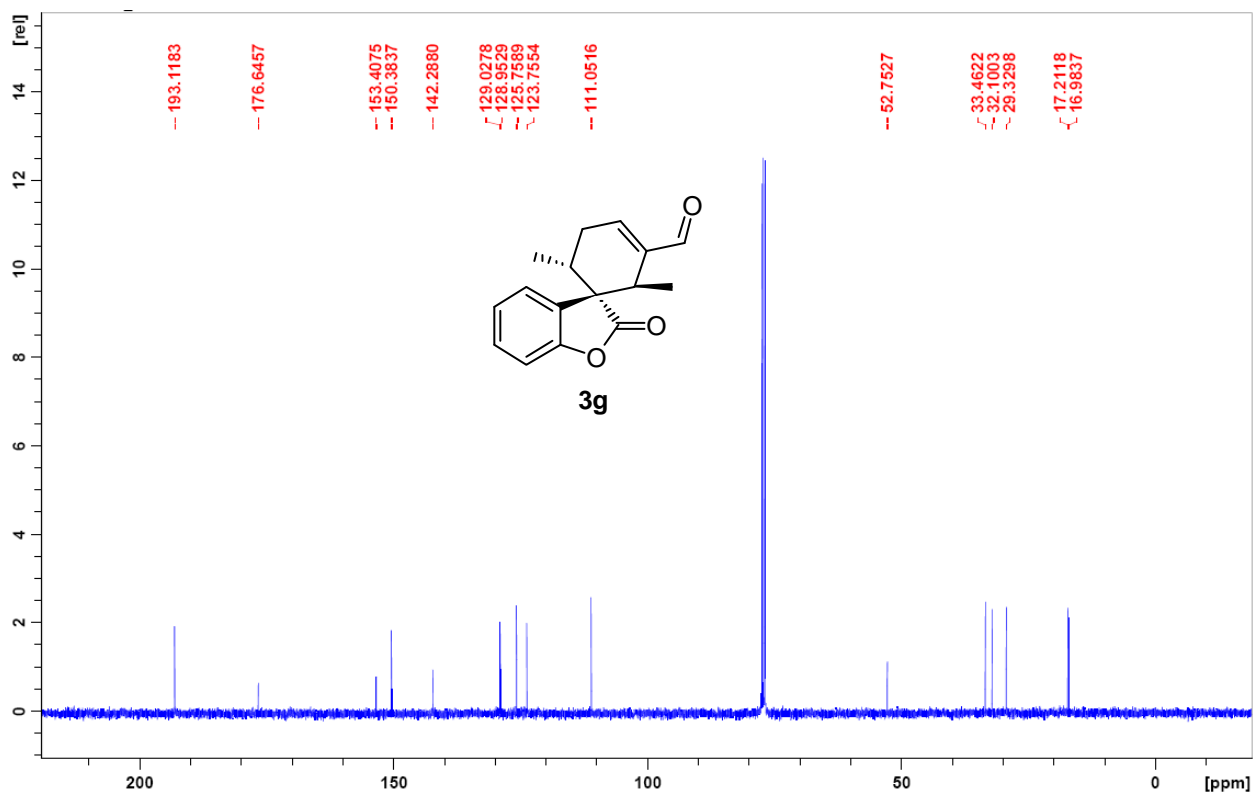

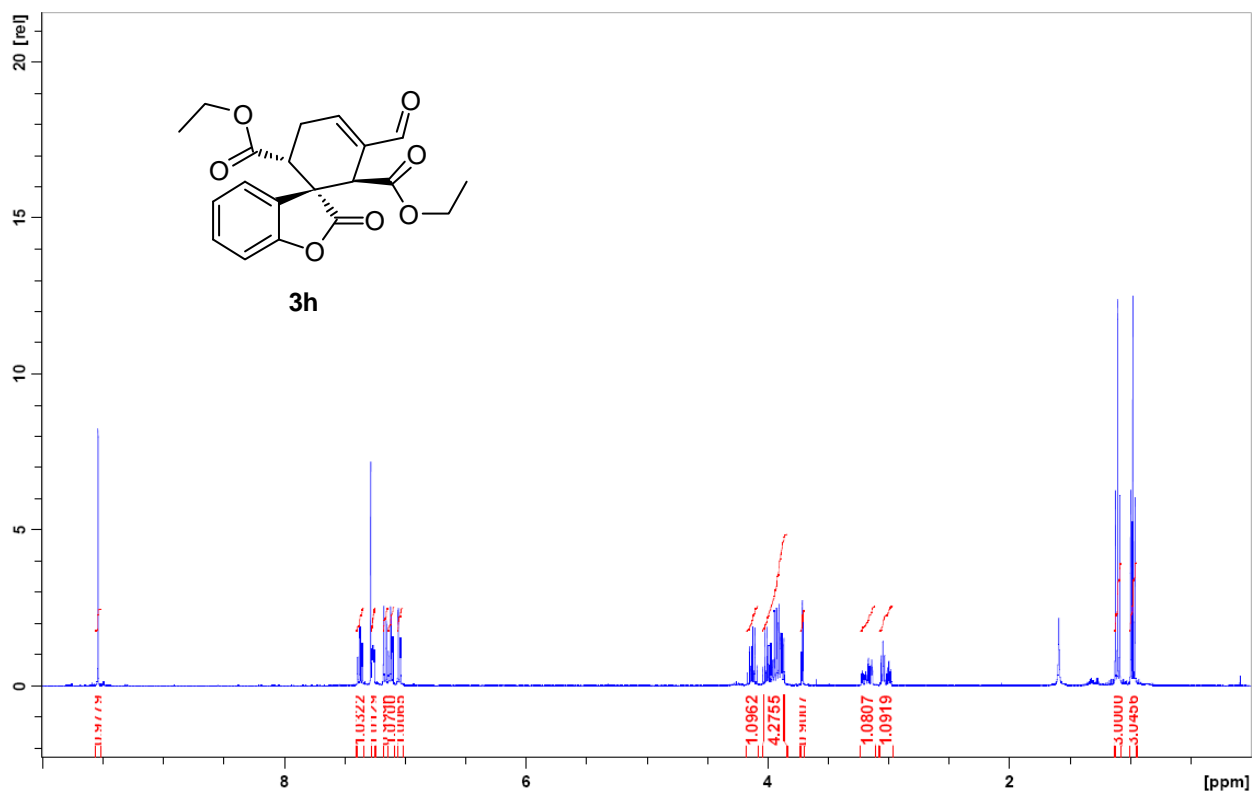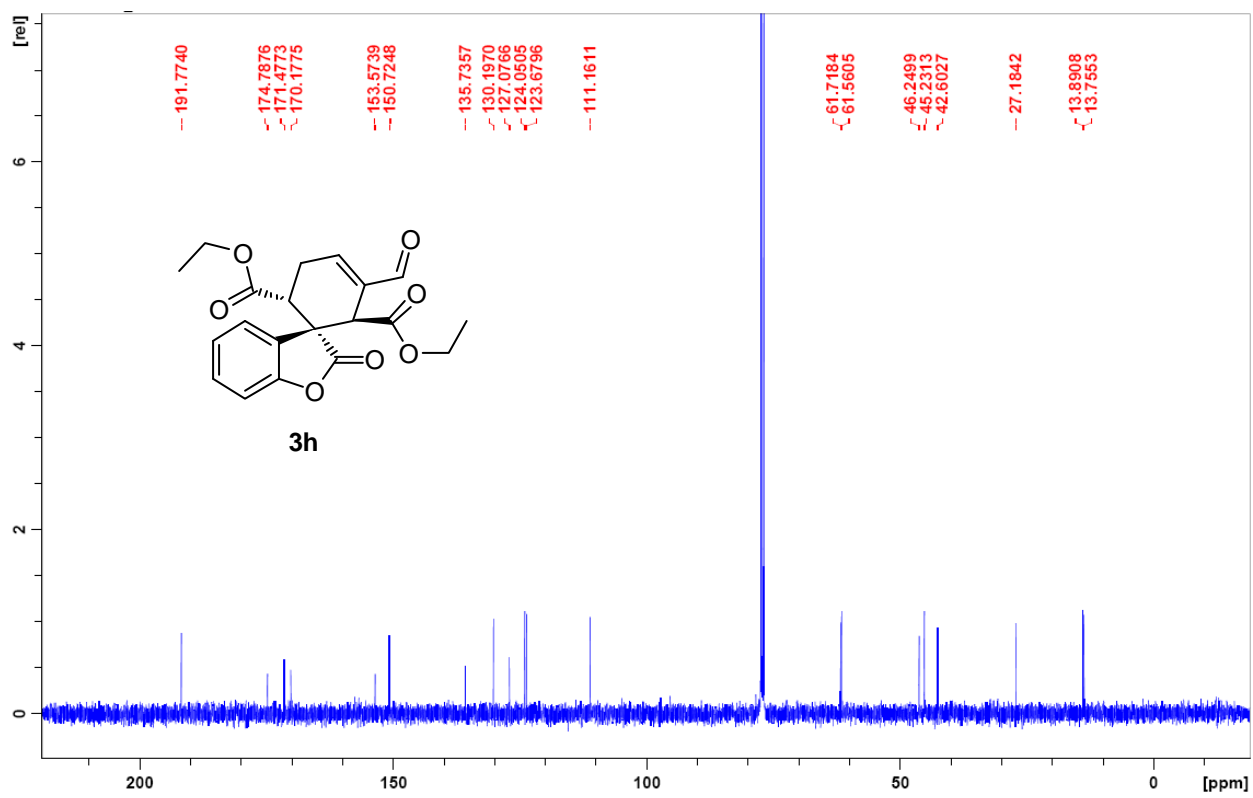

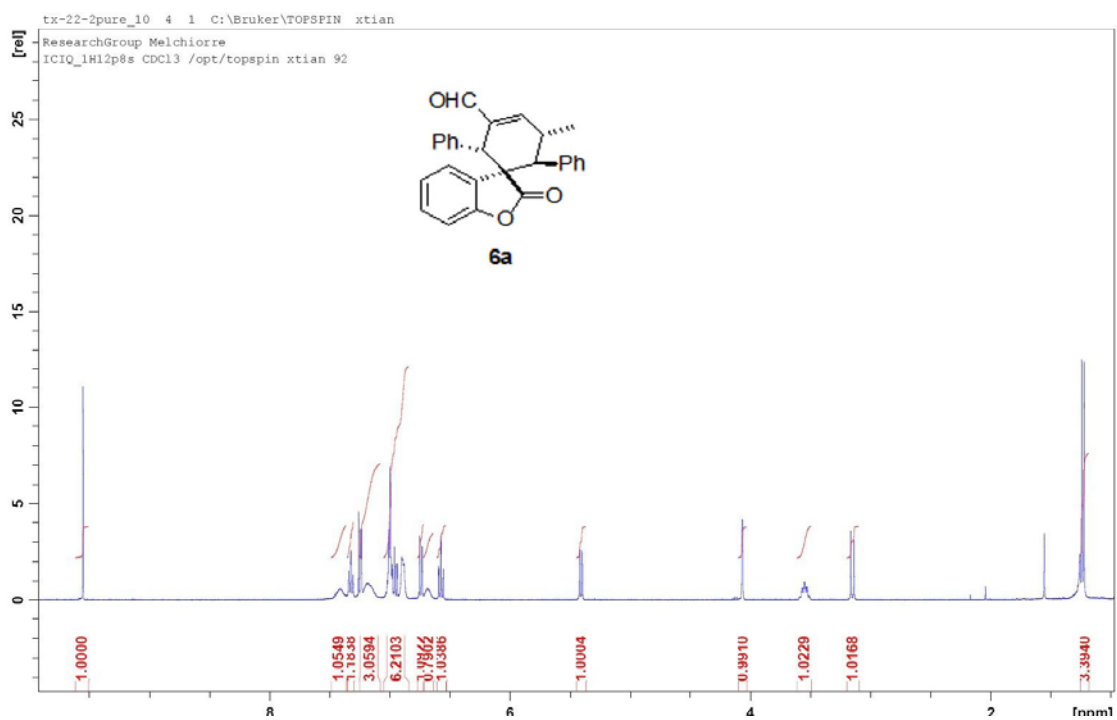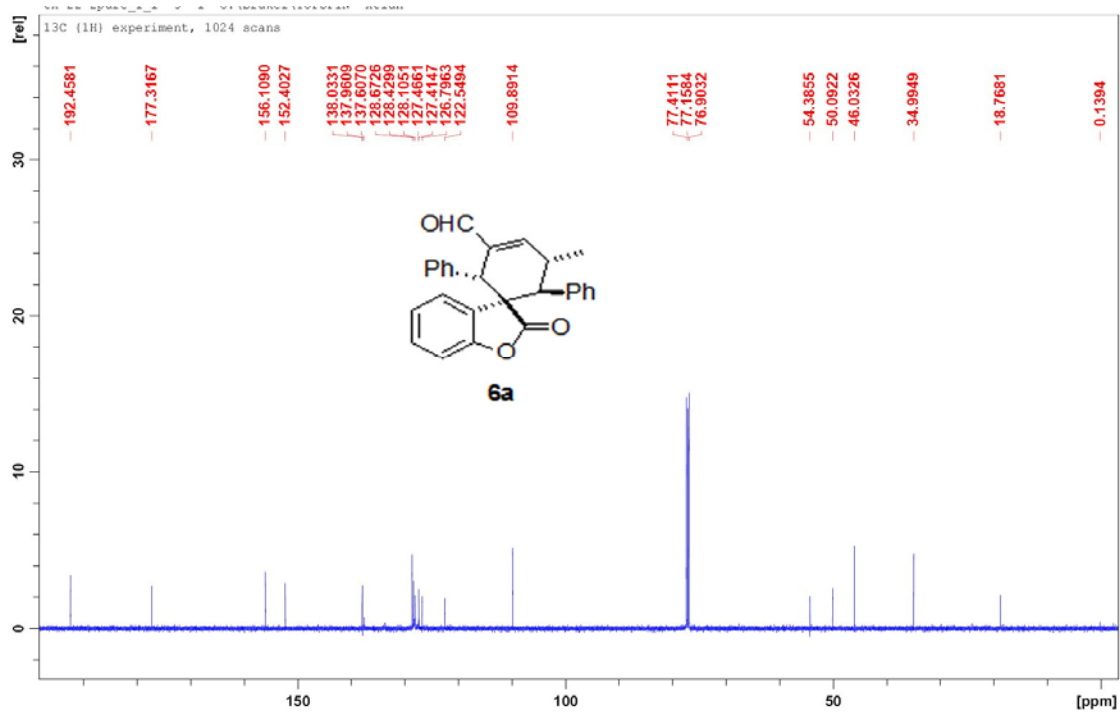

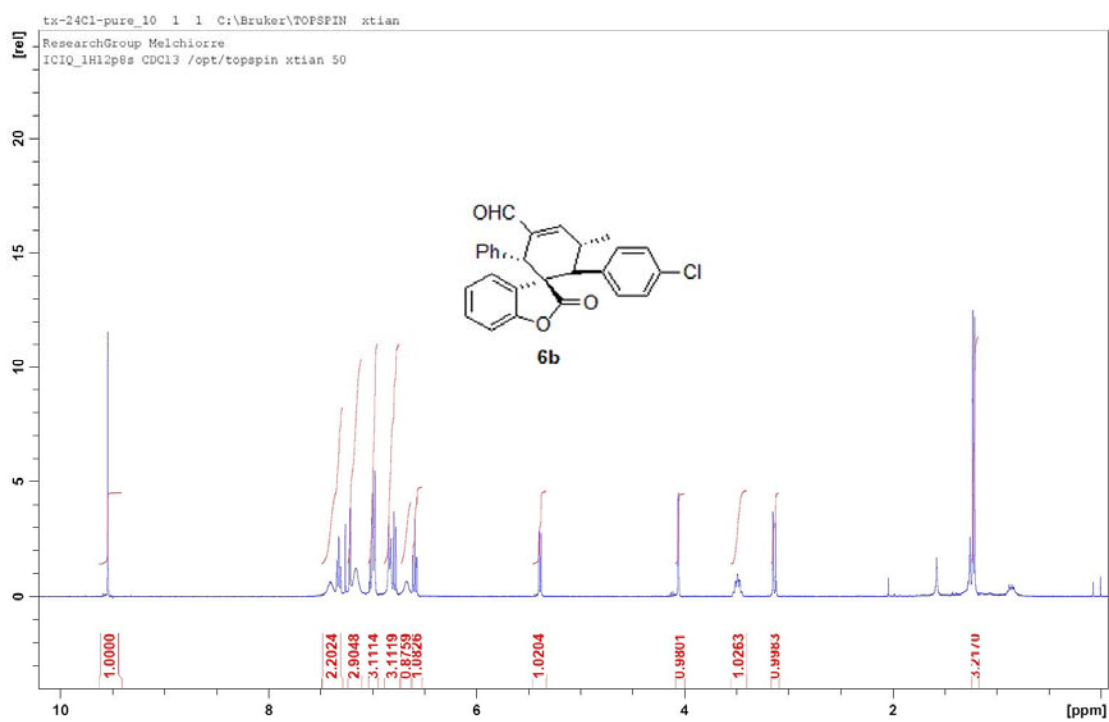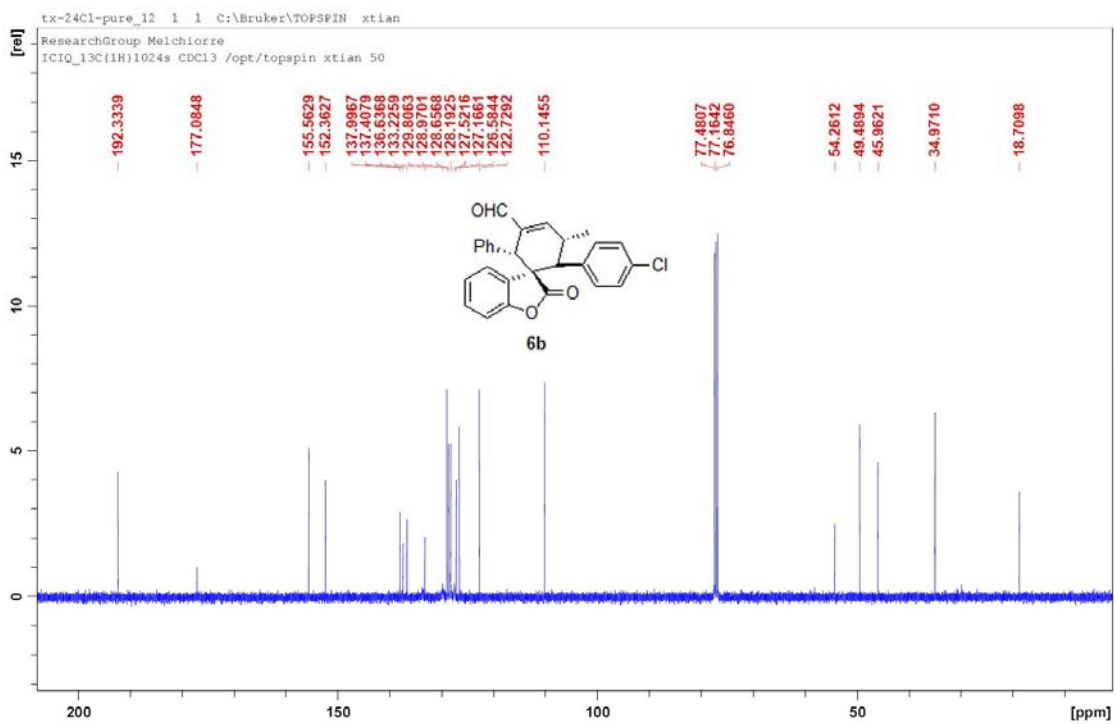

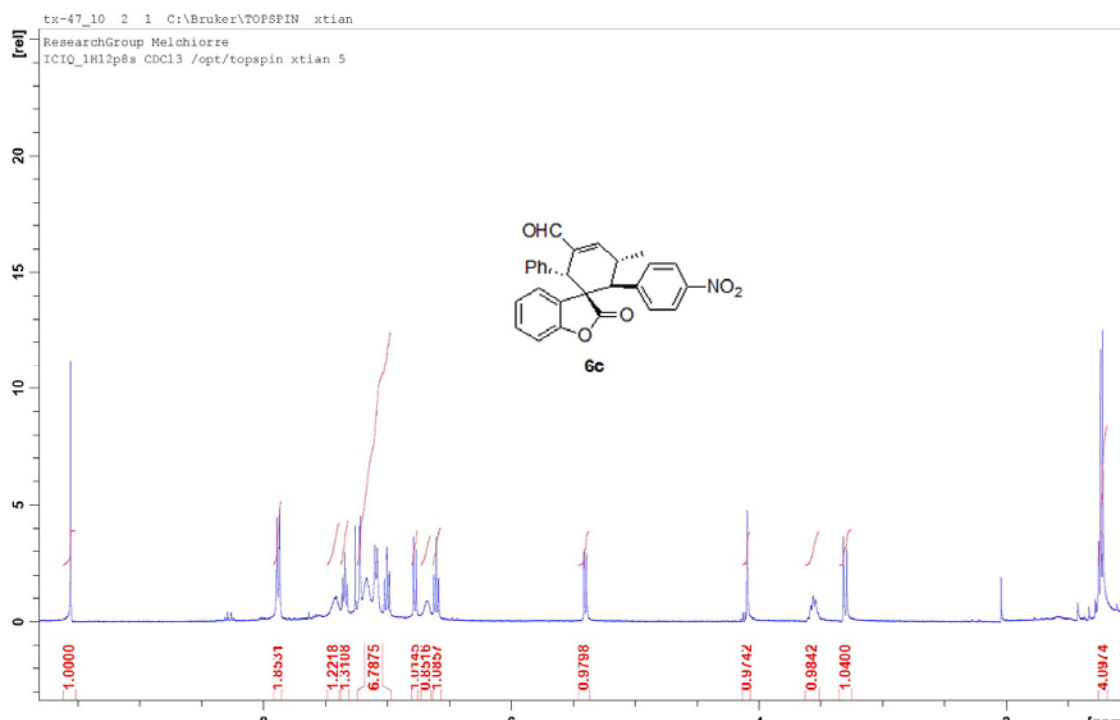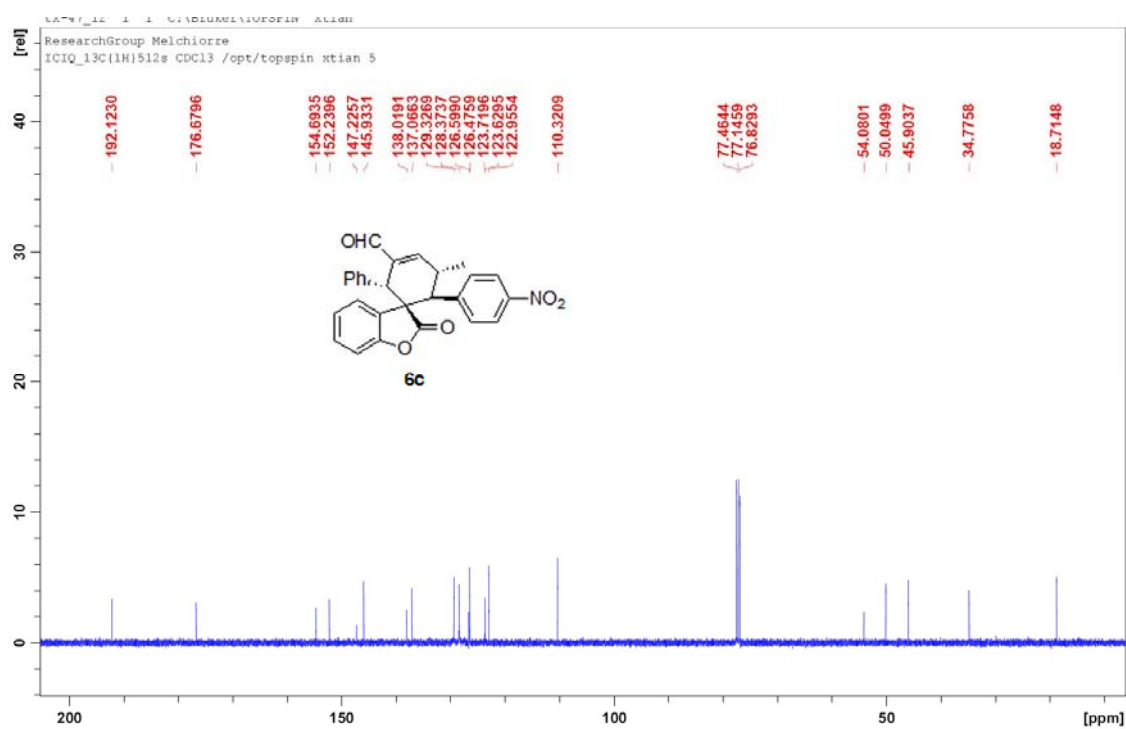

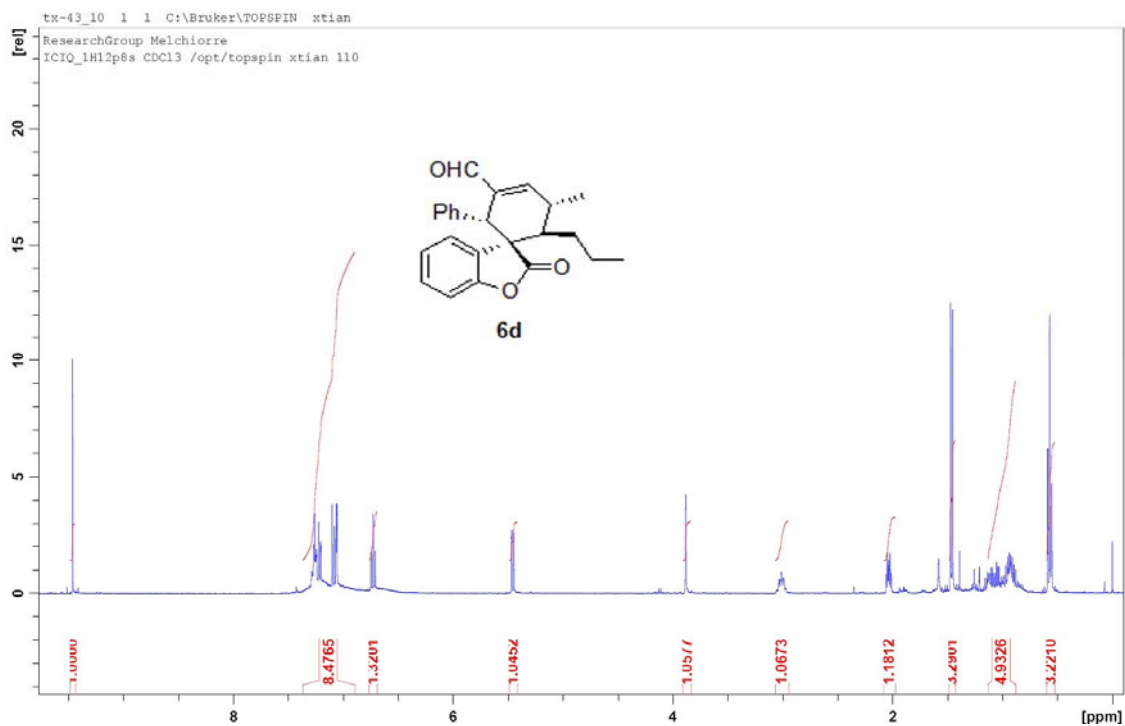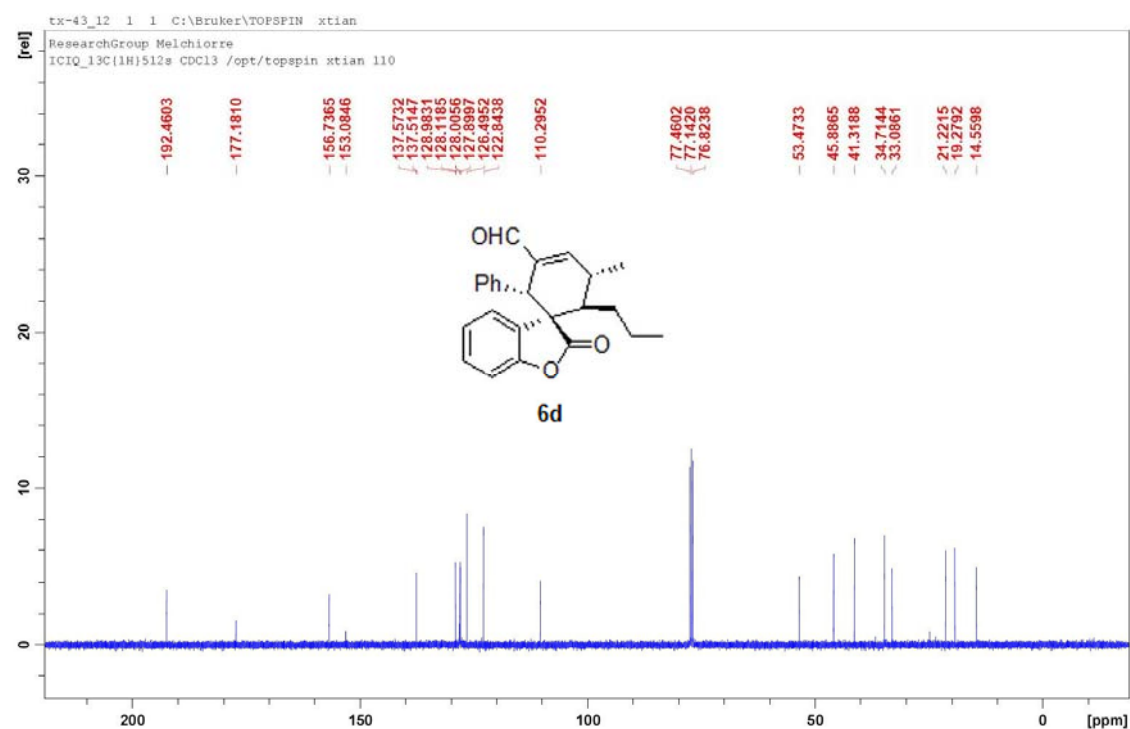



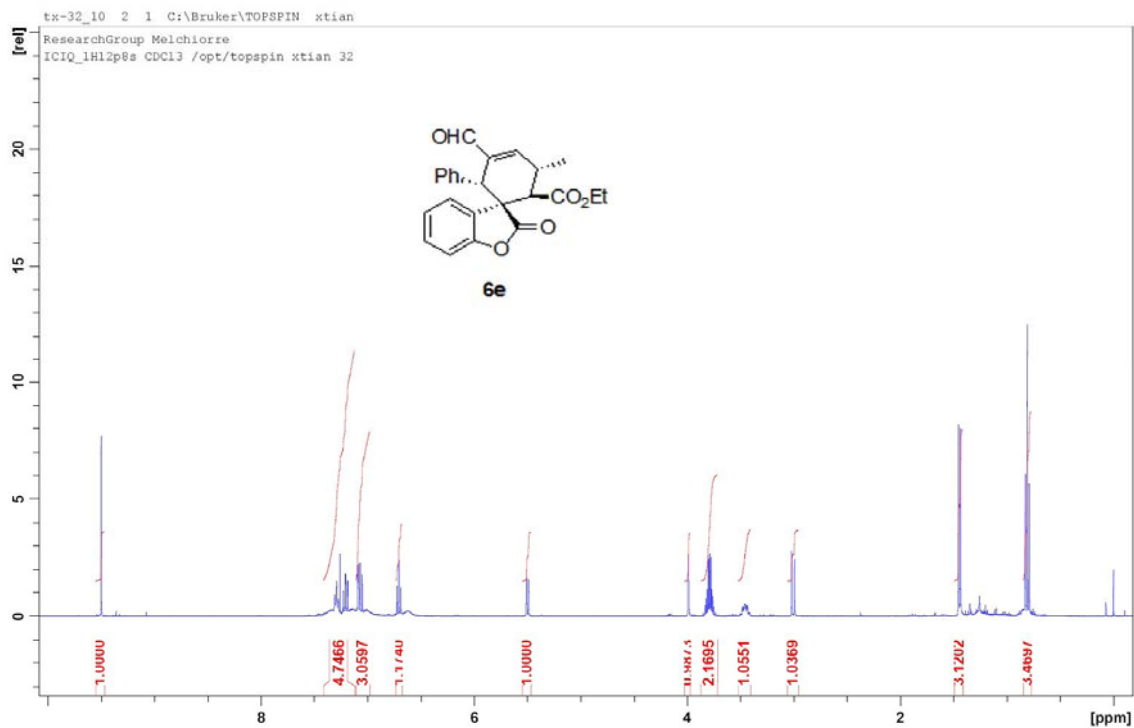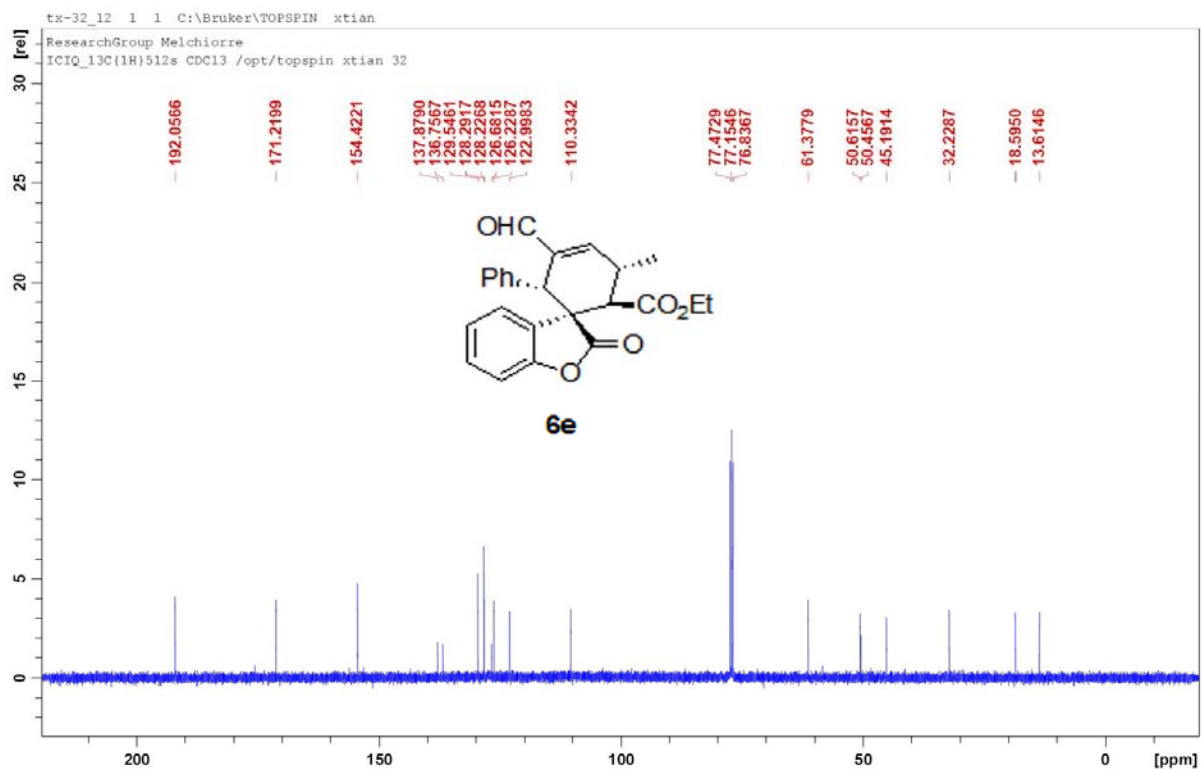

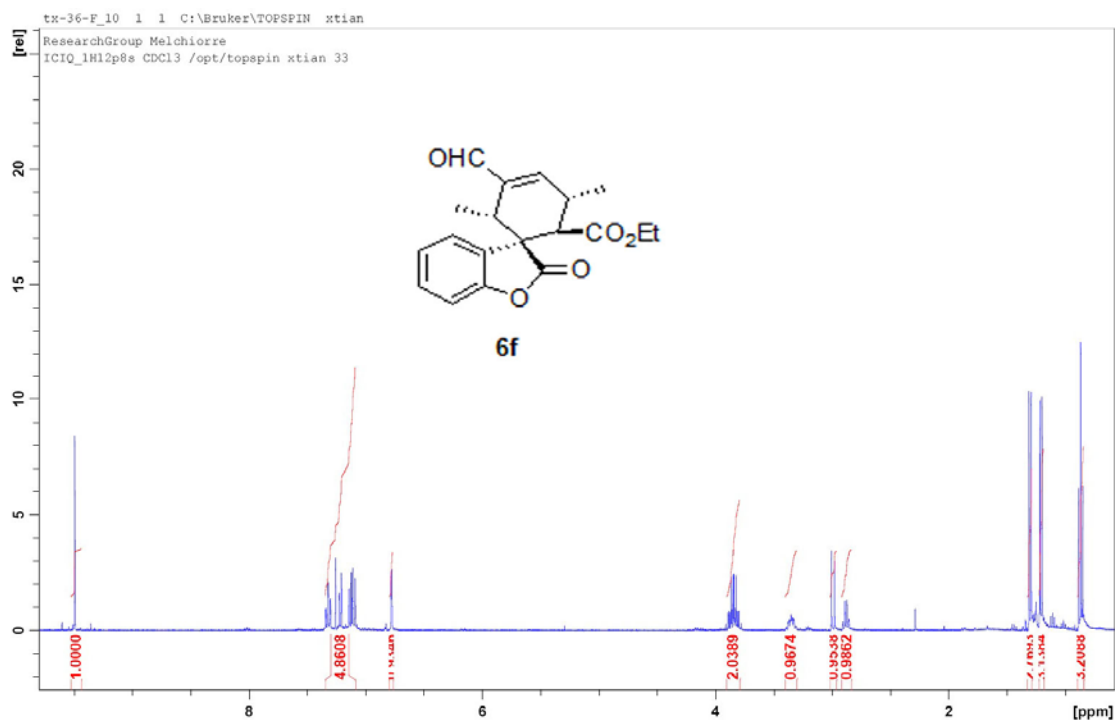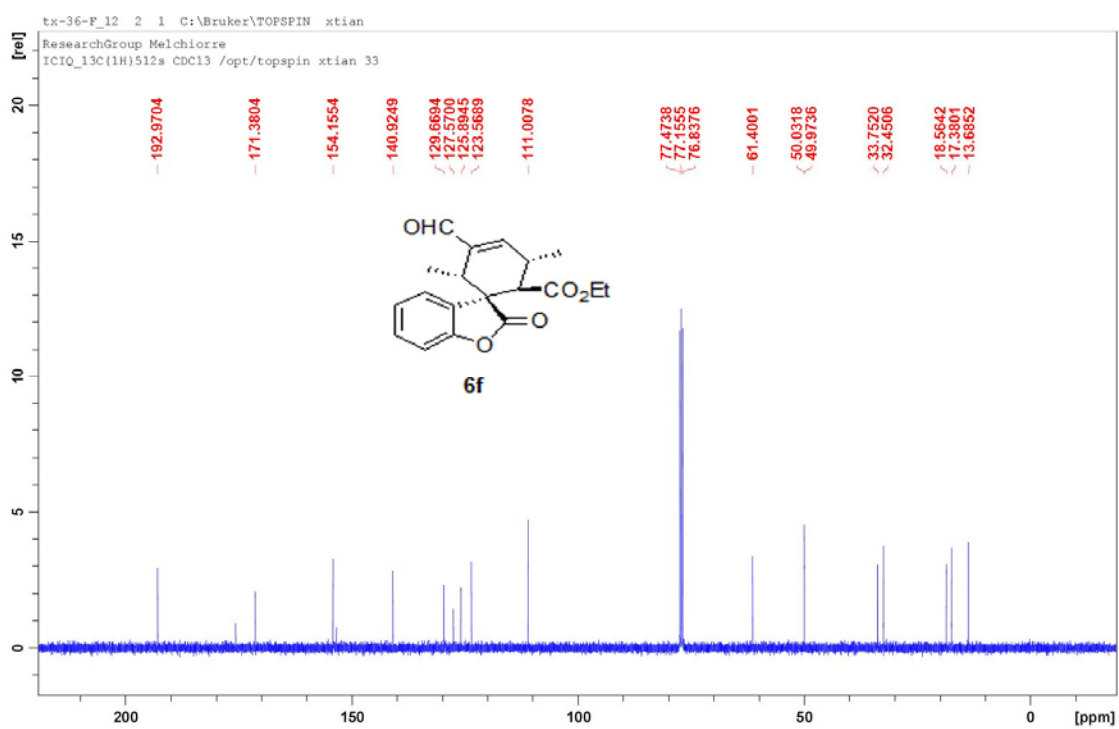

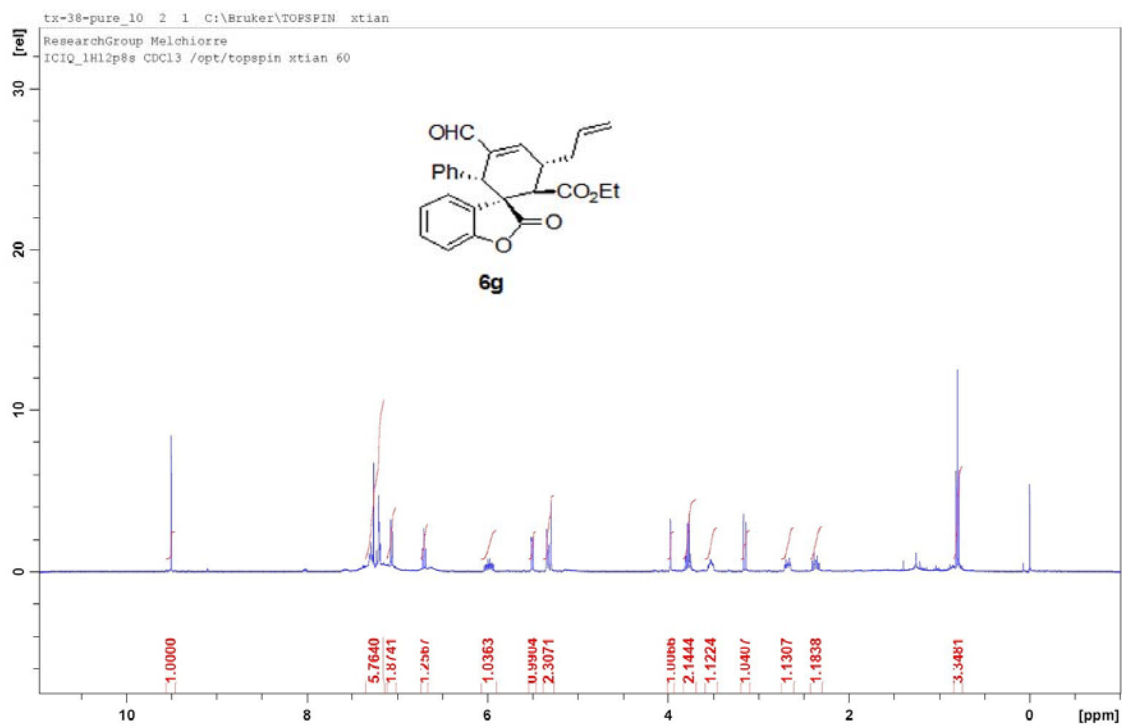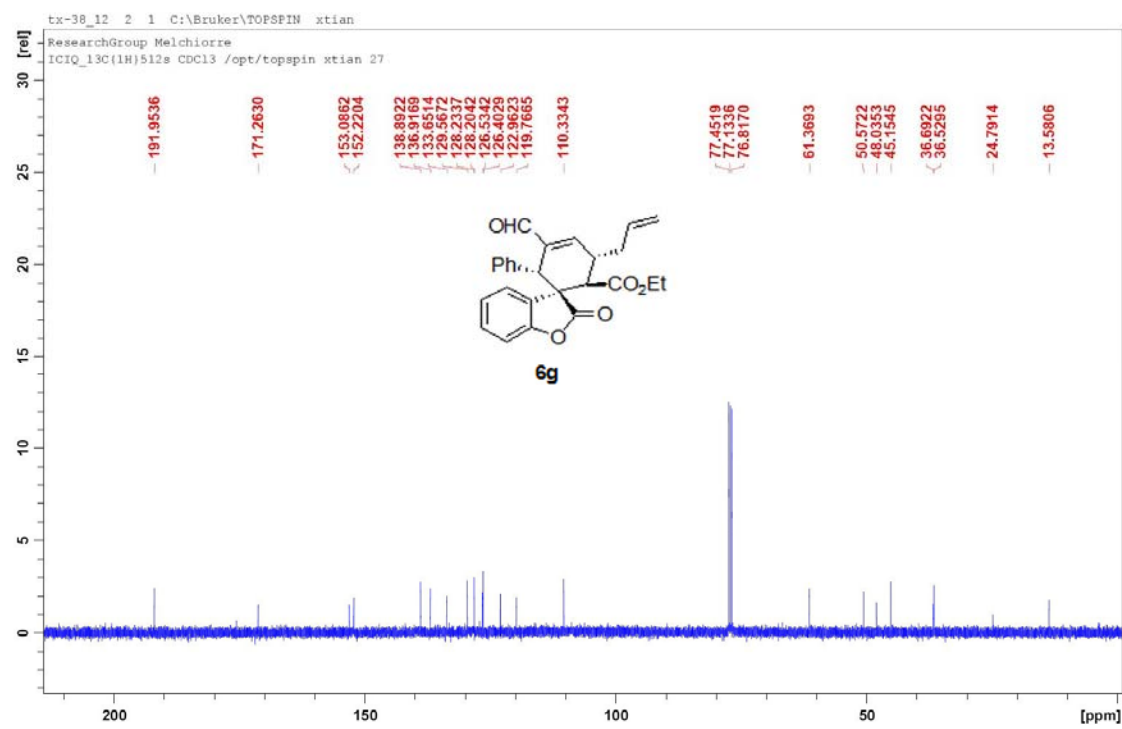

tx-22-QN\_10 5 1 C:\Bruker\TOPSPIN xtian  
ResearchGroup Melchiorre  
ICIQ\_1H12p8s CDC13 /opt/topspin xtian 91

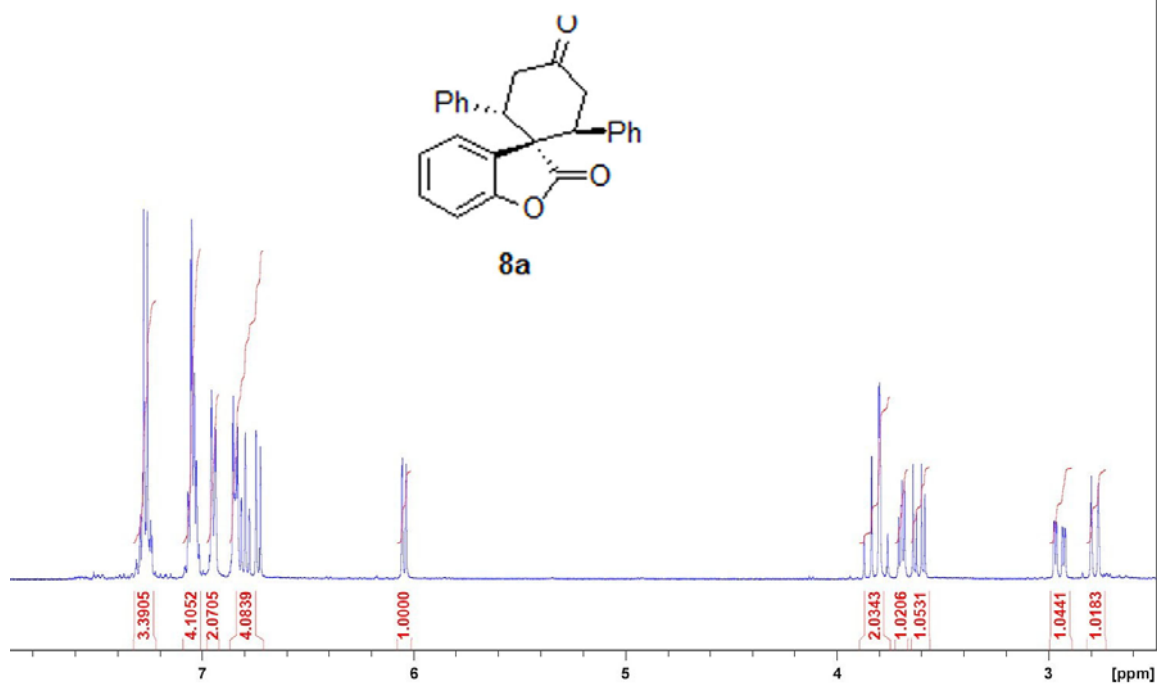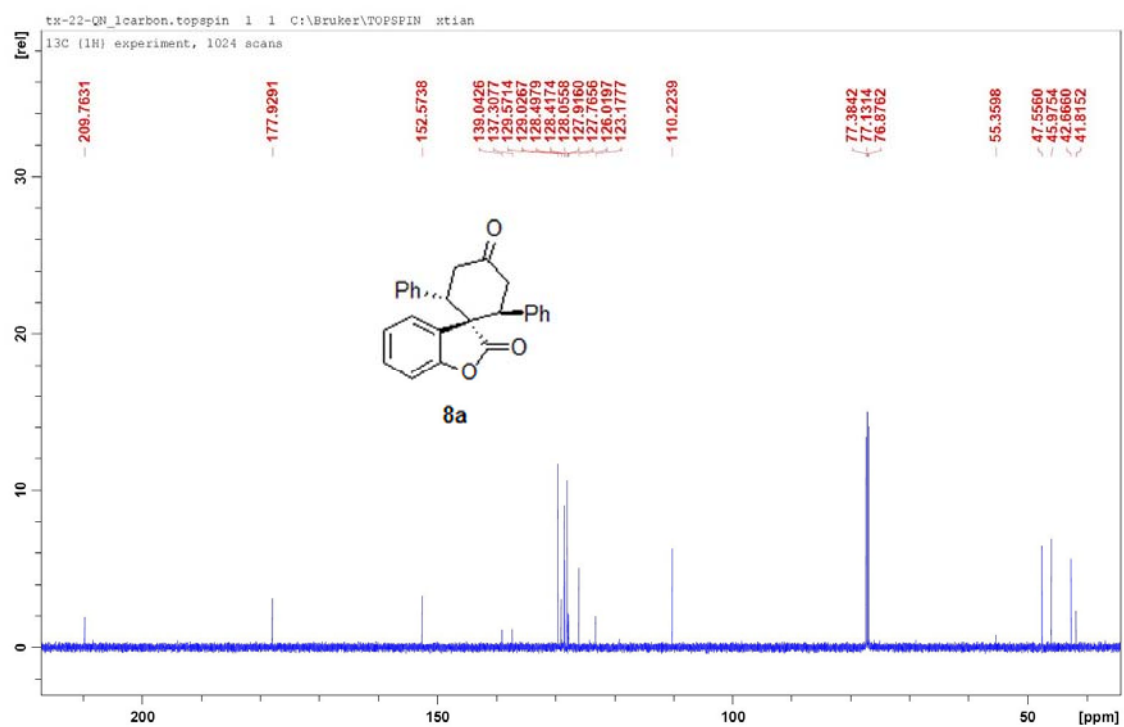

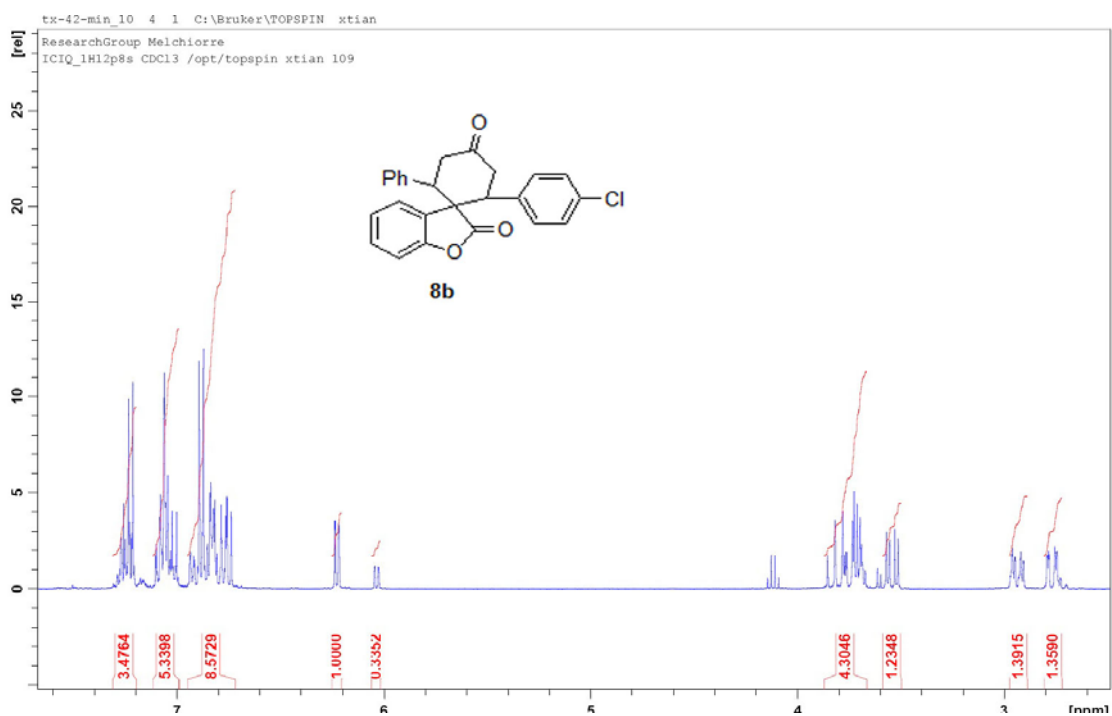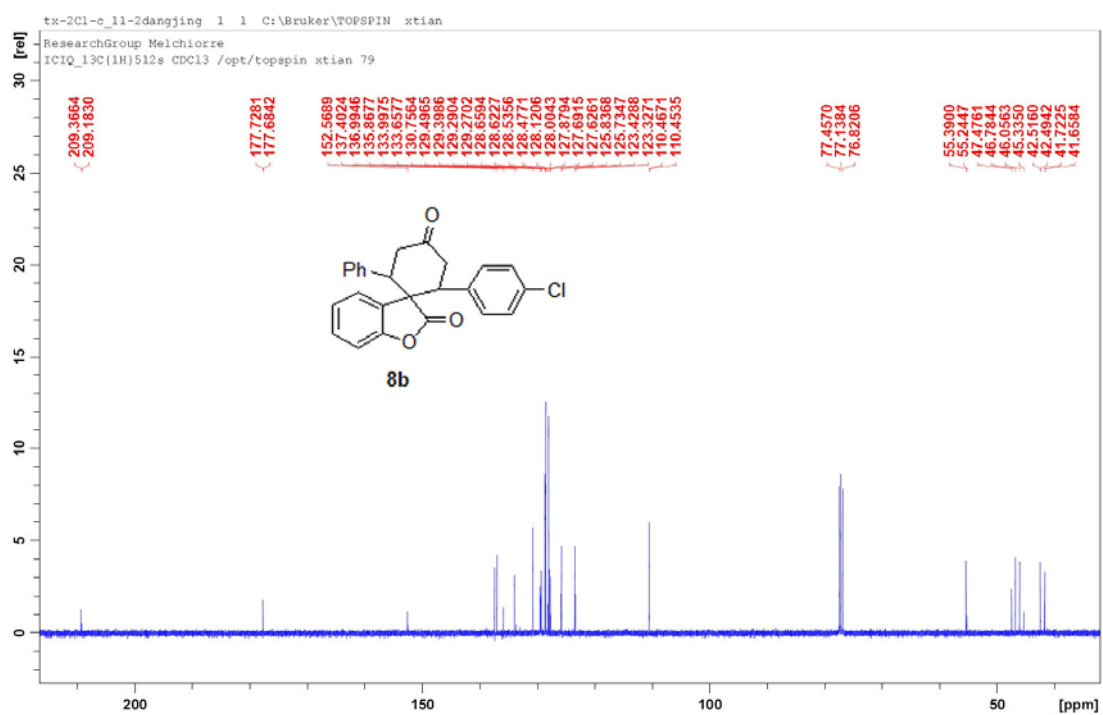

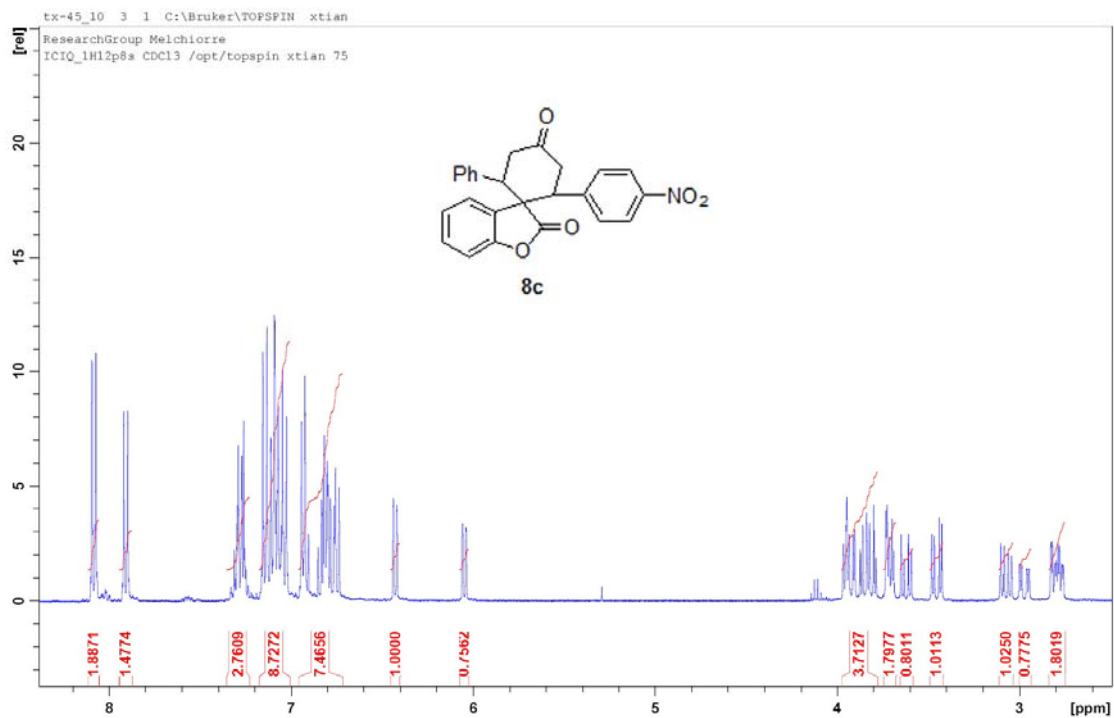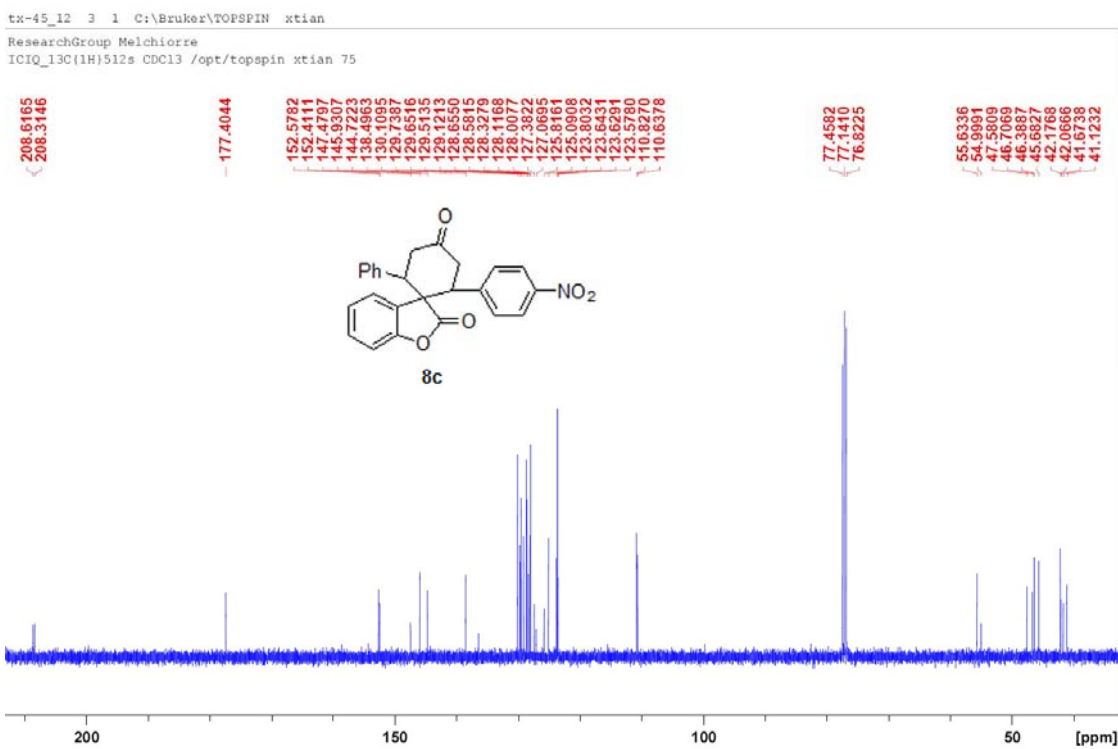

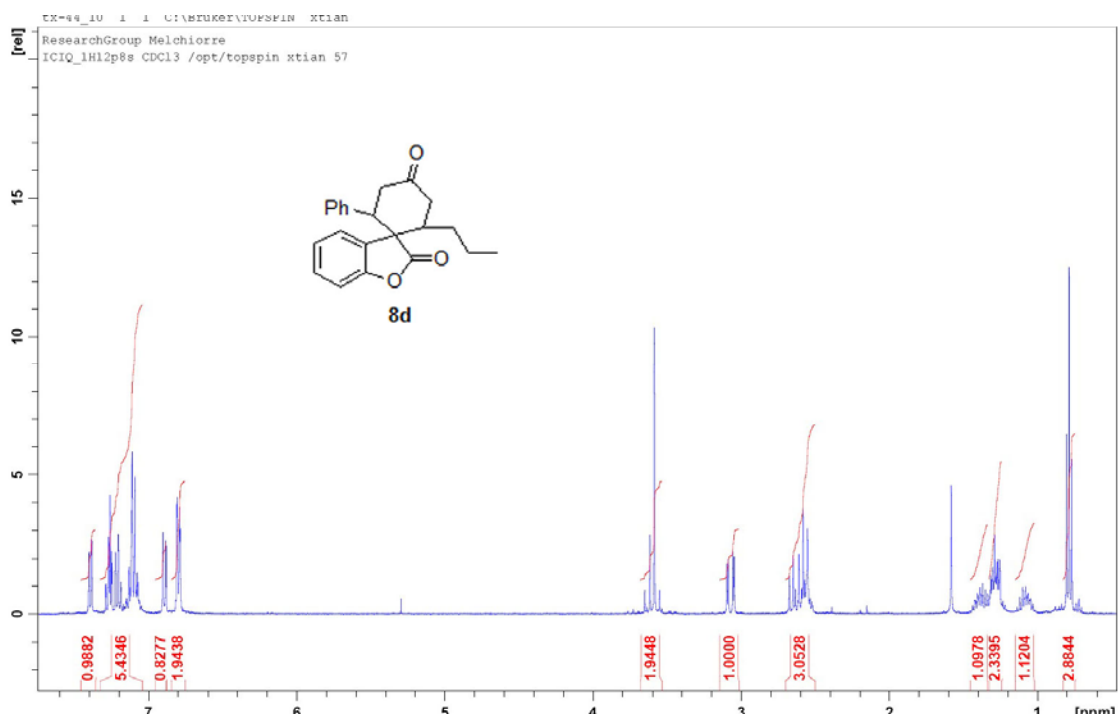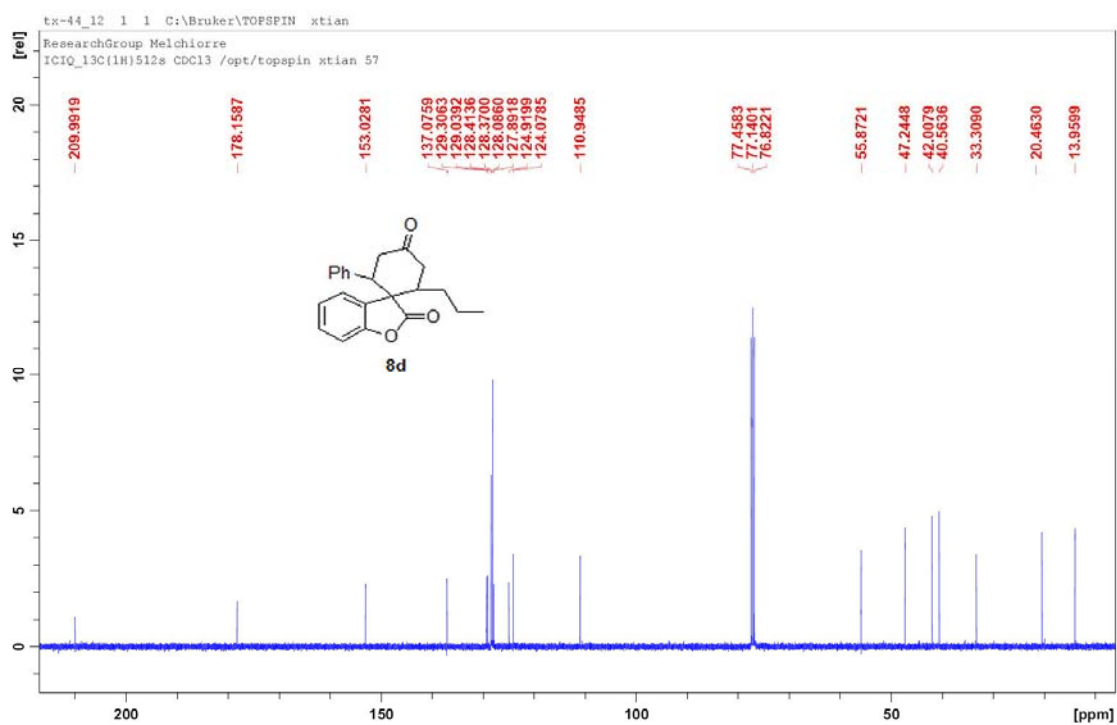

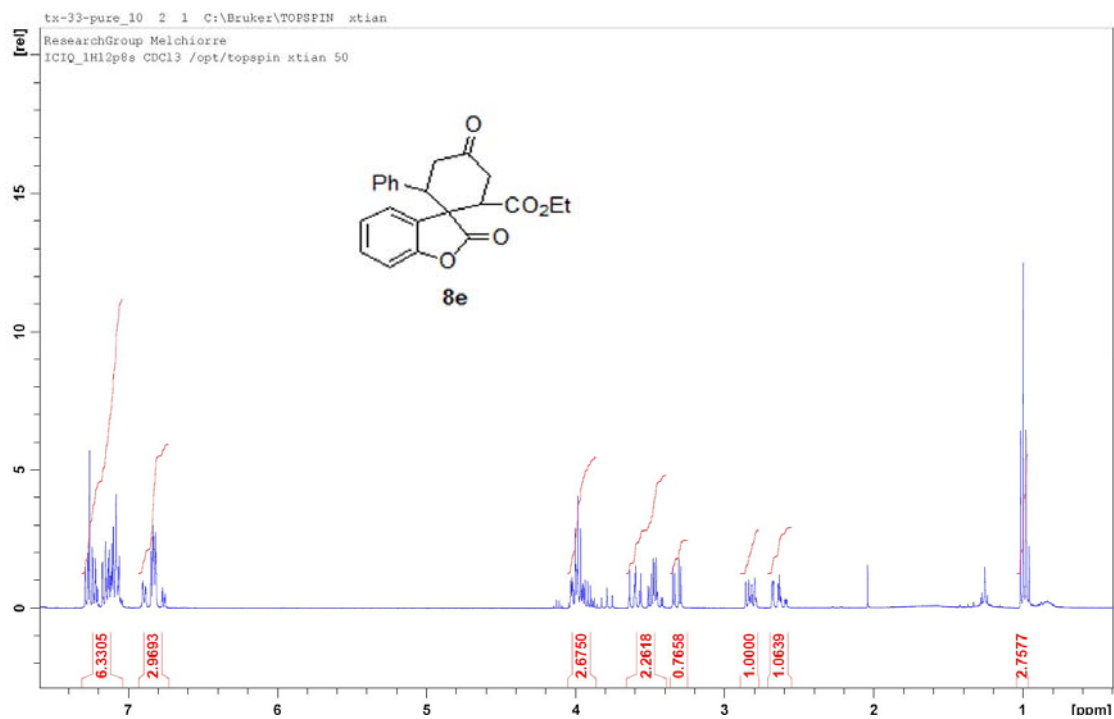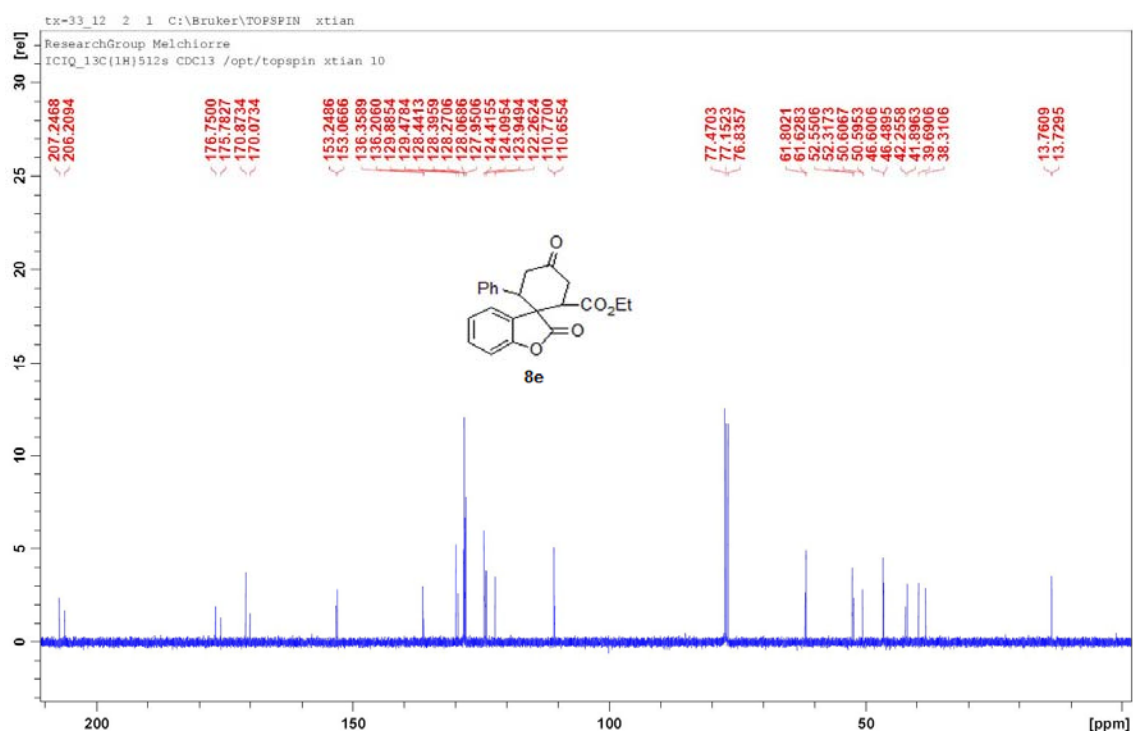



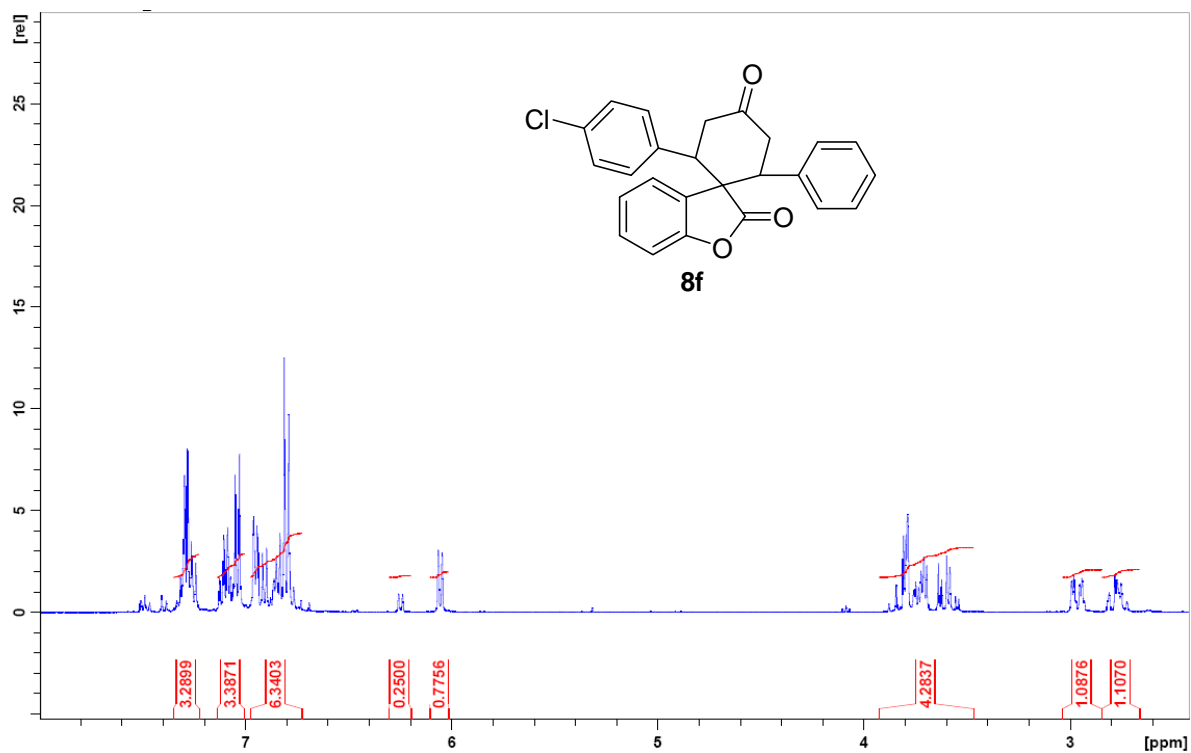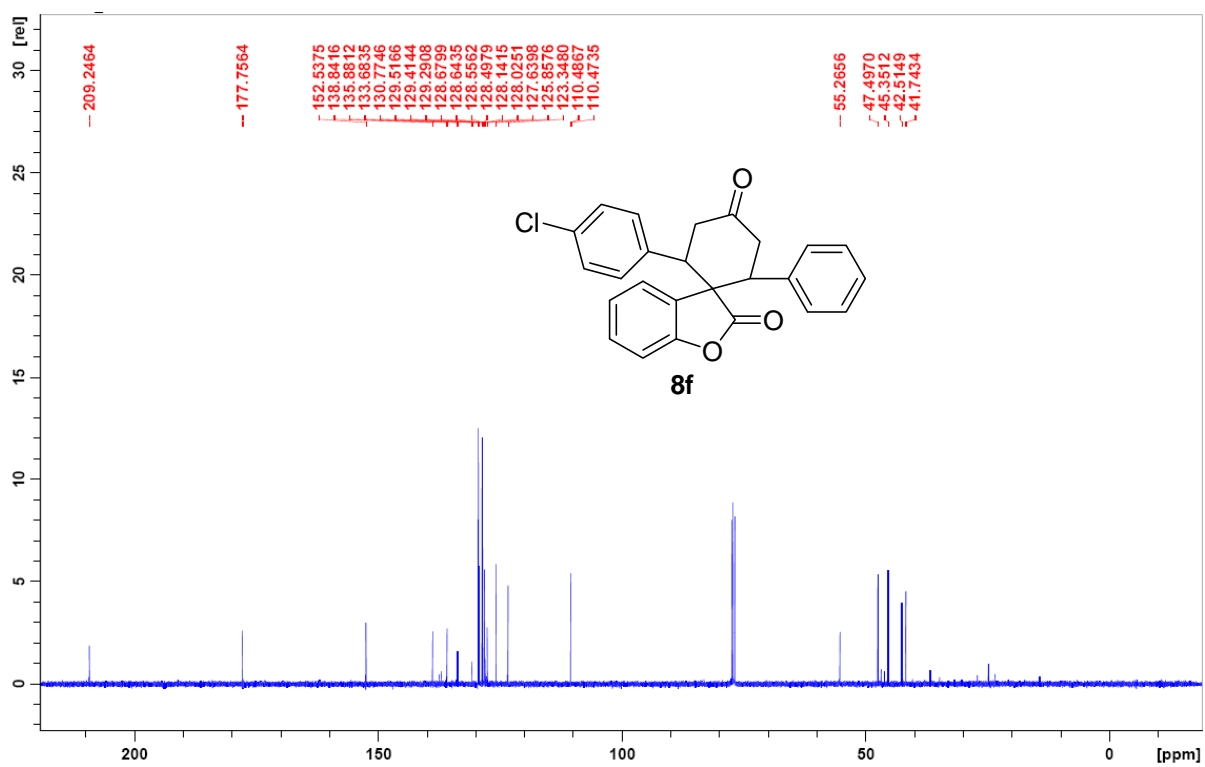

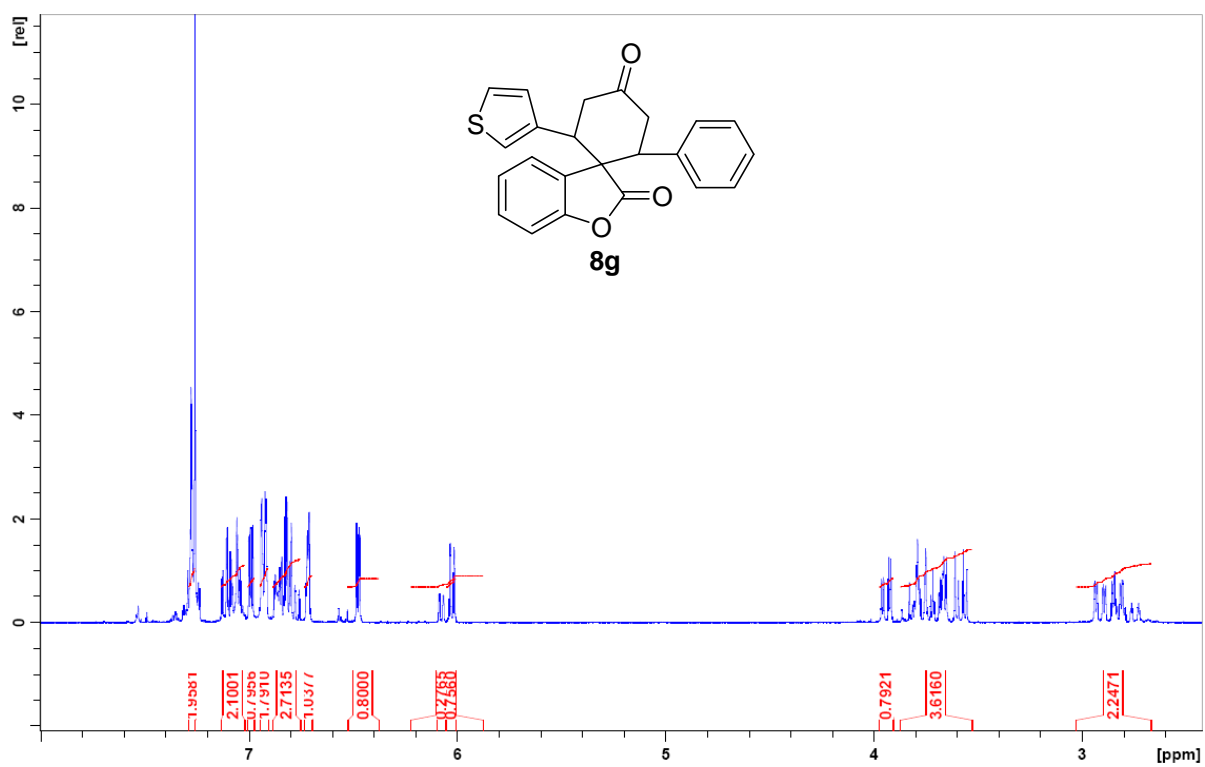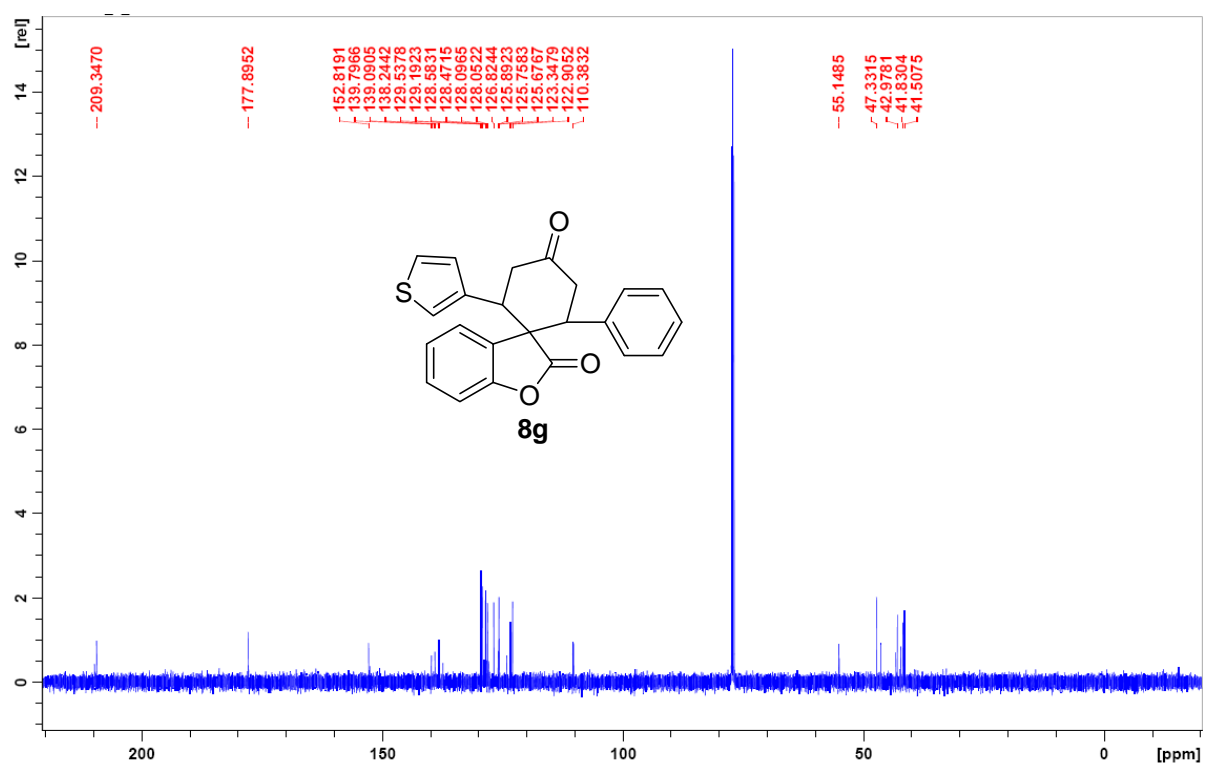

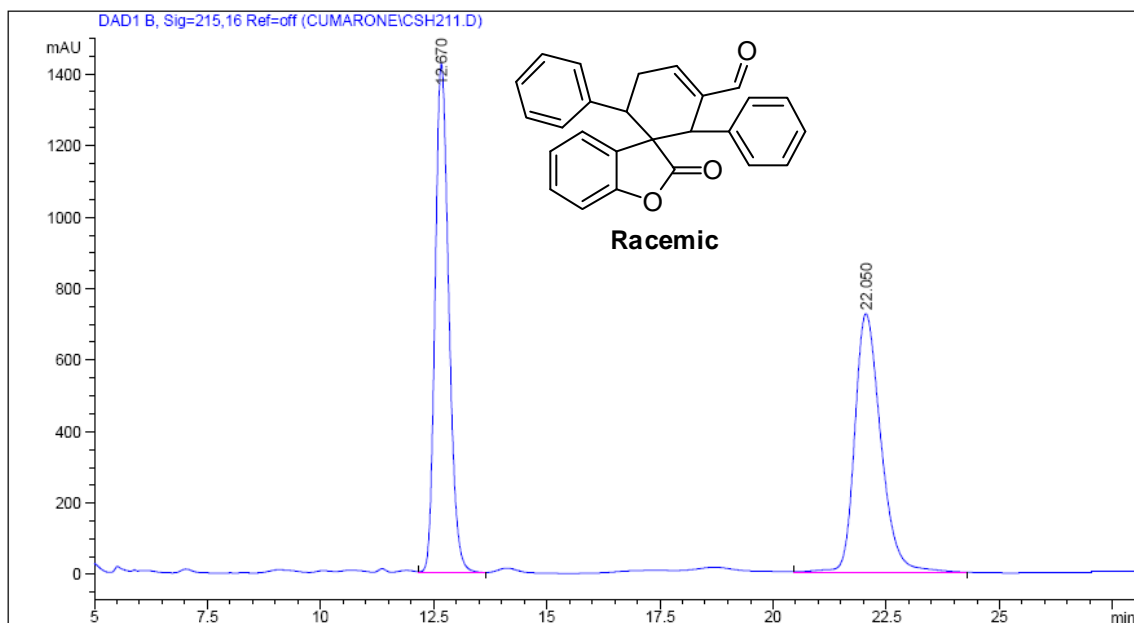

| Peak # | RetTime [min] | Type | Width [min] | Area [mAU*s] | Height [mAU] | Area %  |
|--------|---------------|------|-------------|--------------|--------------|---------|
| 1      | 12.670        | VB   | 0.3280      | 3.00631e4    | 1425.75720   | 50.6164 |
| 2      | 22.050        | VB   | 0.6201      | 2.93308e4    | 724.75903    | 49.3836 |

Totals : 5.93939e4 2150.51624

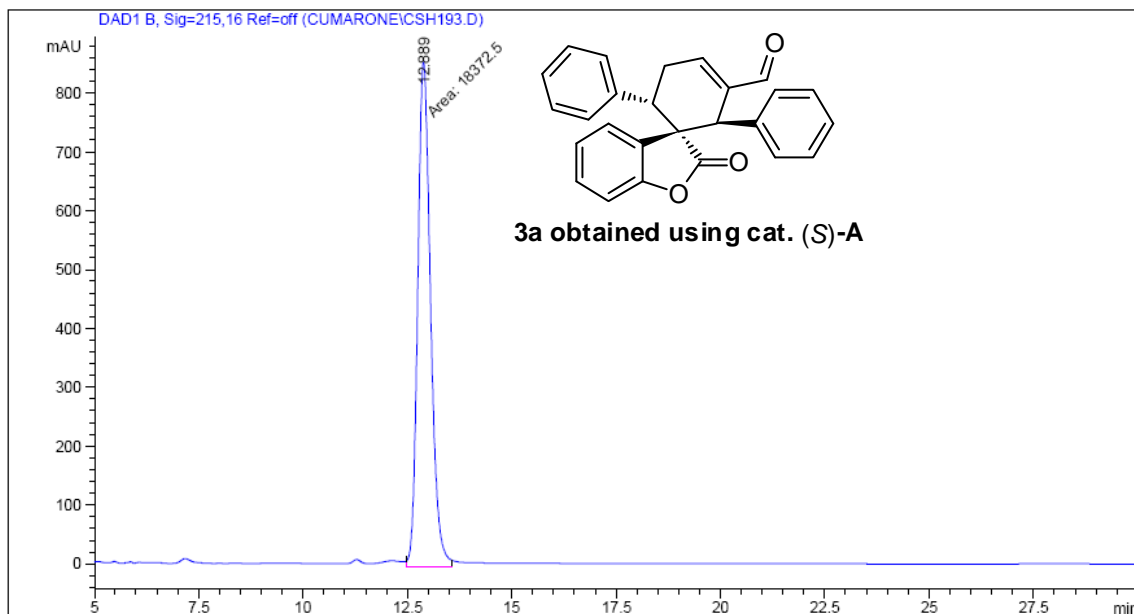

| Peak # | RetTime [min] | Type | Width [min] | Area [mAU*s] | Height [mAU] | Area %   |
|--------|---------------|------|-------------|--------------|--------------|----------|
| 1      | 12.889        | MM   | 0.3574      | 1.83725e4    | 856.83191    | 100.0000 |

Totals : 1.83725e4 856.83191

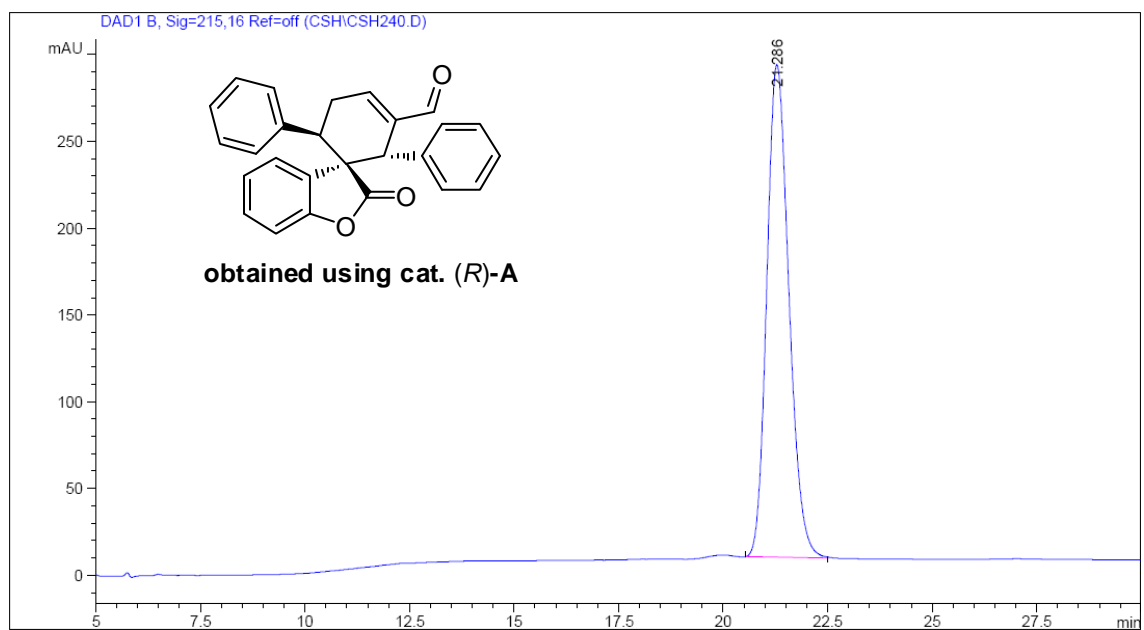

| Peak #   | RetTime [min] | Type | Width [min] | Area [mAU*s] | Height [mAU] | Area %   |
|----------|---------------|------|-------------|--------------|--------------|----------|
| 1        | 21.286        | BB   | 0.5680      | 1.04068e4    | 283.69678    | 100.0000 |
| Totals : |               |      |             | 1.04068e4    | 283.69678    |          |

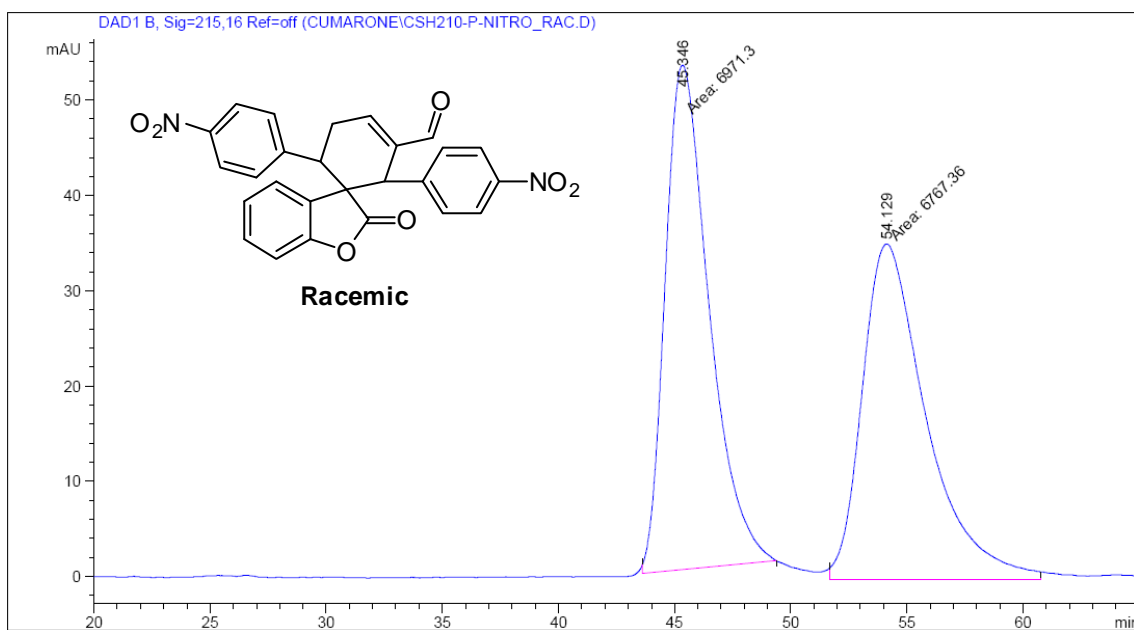

| Peak #   | RetTime [min] | Type | Width [min] | Area [mAU*s] | Height [mAU] | Area %  |
|----------|---------------|------|-------------|--------------|--------------|---------|
| 1        | 45.346        | MM   | 2.1949      | 6971.30371   | 52.93671     | 50.7422 |
| 2        | 54.129        | MM   | 3.1970      | 6767.35645   | 35.27945     | 49.2578 |
| Totals : |               |      |             | 1.37387e4    | 88.21616     |         |

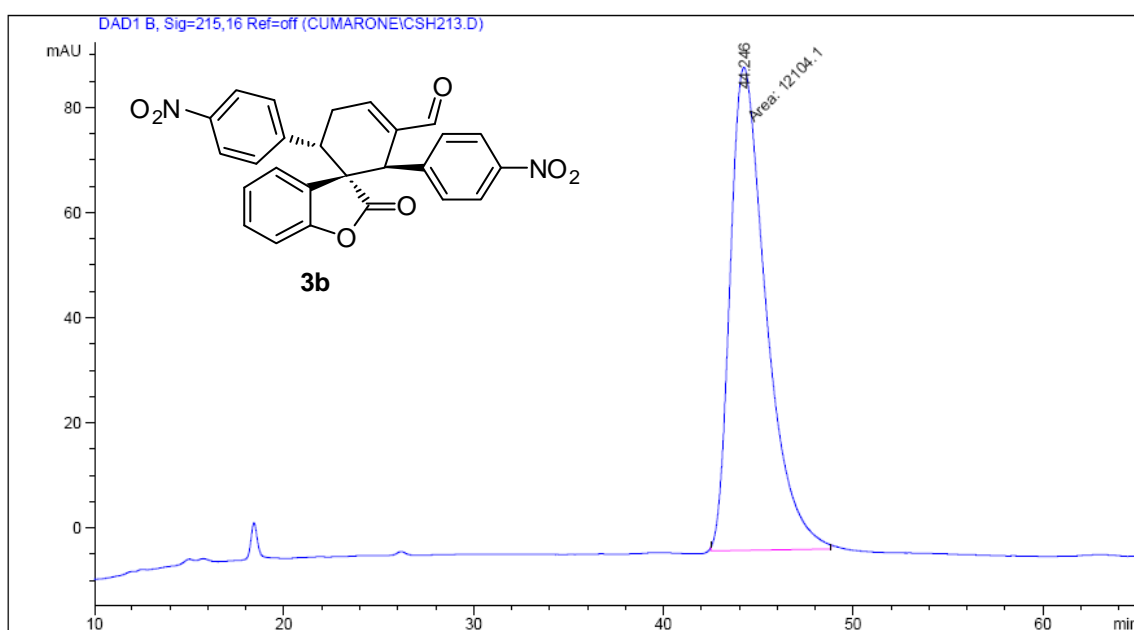

| Peak #   | RetTime [min] | Type | Width [min] | Area [mAU*s] | Height [mAU] | Area %   |
|----------|---------------|------|-------------|--------------|--------------|----------|
| 1        | 44.246        | MM   | 2.1959      | 1.21041e4    | 91.86876     | 100.0000 |
| Totals : |               |      |             | 1.21041e4    | 91.86876     |          |

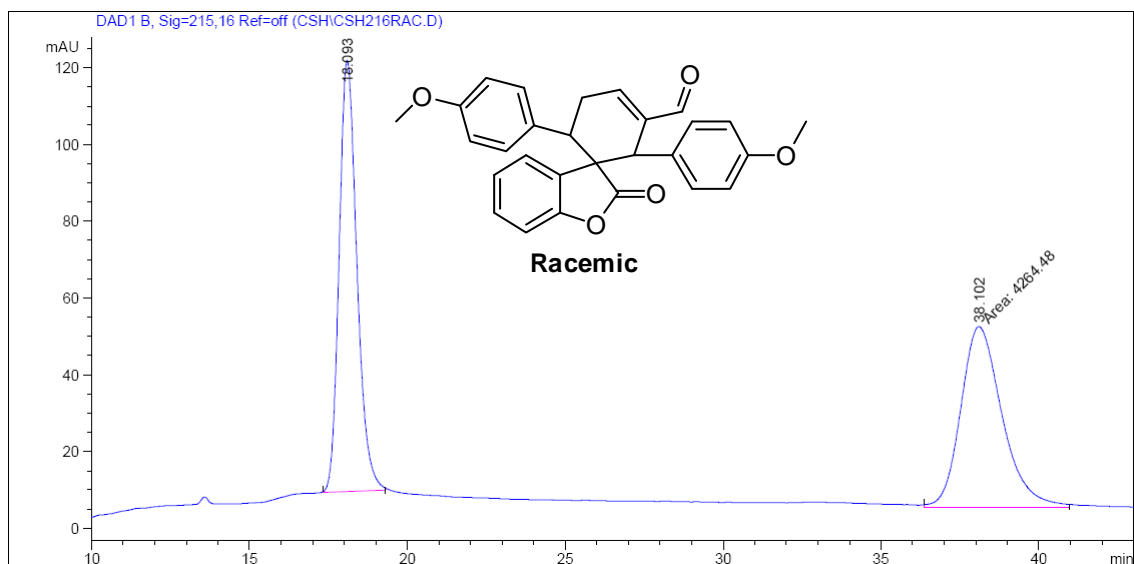

| Peak # | RetTime [min] | Type | Width [min] | Area [mAU*s] | Height [mAU] | Area %  |
|--------|---------------|------|-------------|--------------|--------------|---------|
| 1      | 18.093        | BB   | 0.6027      | 4397.37793   | 112.34100    | 50.7672 |
| 2      | 38.102        | MM   | 1.5126      | 4264.47656   | 46.98909     | 49.2328 |

Totals : 8661.85449 159.33009

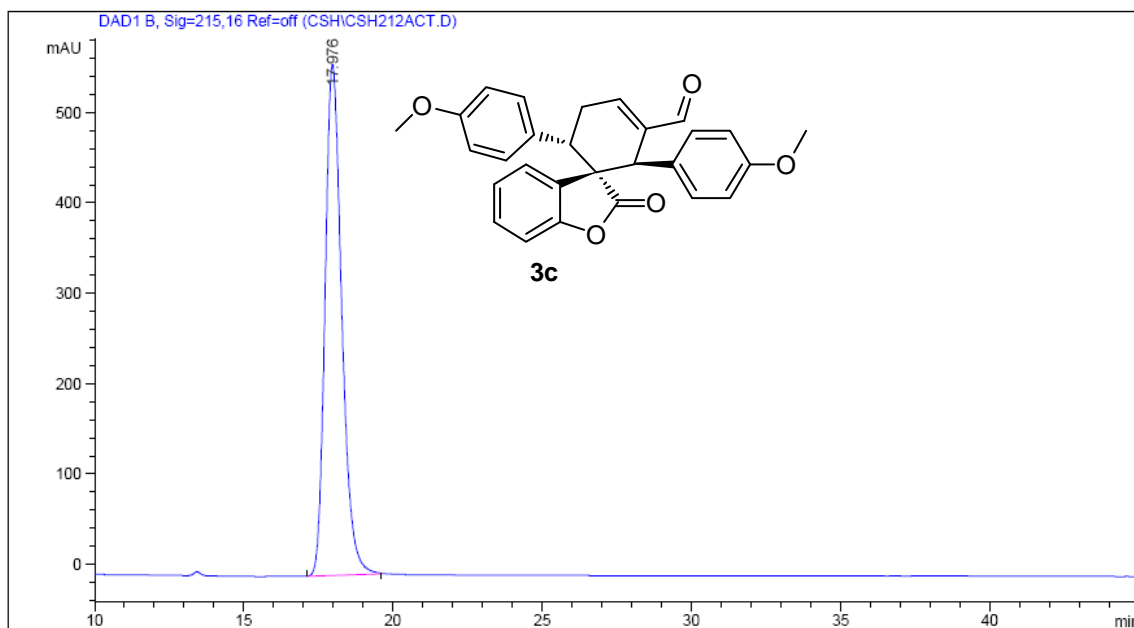

| Peak # | RetTime [min] | Type | Width [min] | Area [mAU*s] | Height [mAU] | Area %   |
|--------|---------------|------|-------------|--------------|--------------|----------|
| 1      | 17.976        | BB   | 0.5964      | 2.19693e4    | 566.55658    | 100.0000 |

Totals : 2.19693e4 566.55658

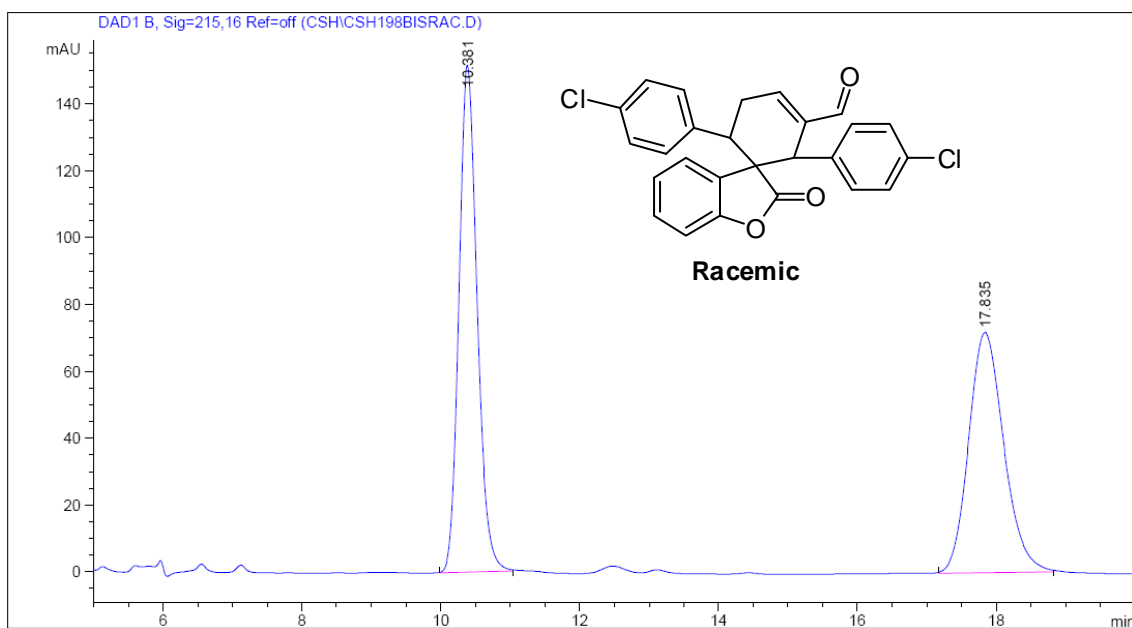

| Peak # | RetTime [min] | Type | Width [min] | Area [mAU*s] | Height [mAU] | Area %  |
|--------|---------------|------|-------------|--------------|--------------|---------|
| 1      | 10.381        | BB   | 0.2806      | 2761.79541   | 151.53151    | 52.3209 |
| 2      | 17.835        | BB   | 0.5407      | 2516.77246   | 71.83670     | 47.6791 |

Totals : 5278.56787 223.36821

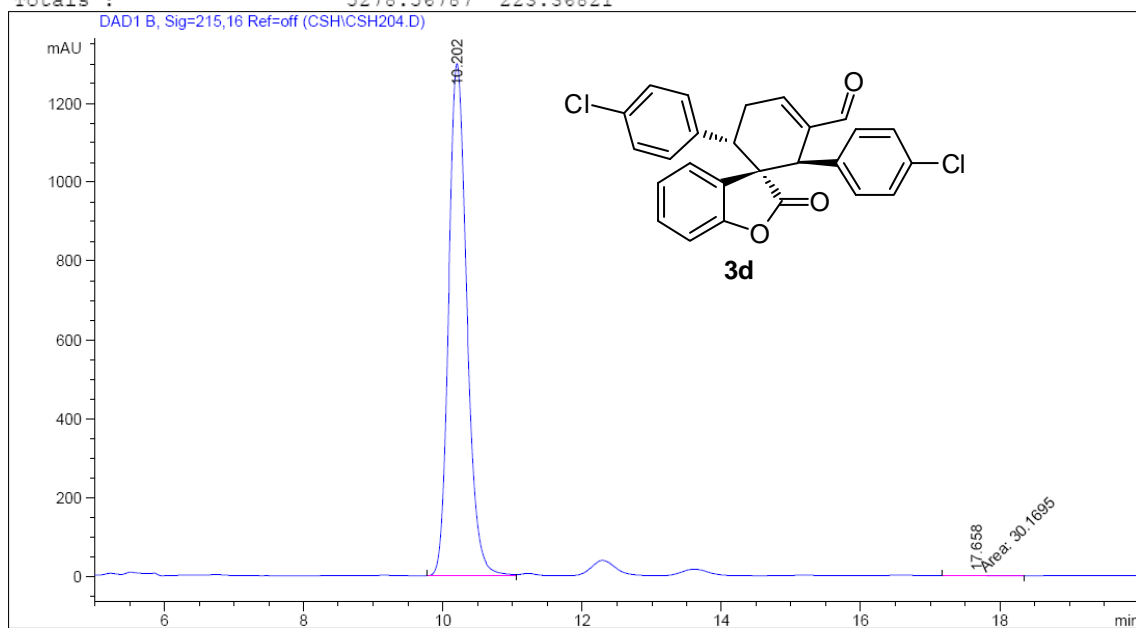

| Peak # | RetTime [min] | Type | Width [min] | Area [mAU*s] | Height [mAU] | Area %  |
|--------|---------------|------|-------------|--------------|--------------|---------|
| 1      | 10.202        | BV   | 0.2789      | 2.34725e4    | 1298.76355   | 99.8716 |
| 2      | 17.658        | MM   | 0.7654      | 30.16950     | 6.56904e-1   | 0.1284  |

Totals : 2.35027e4 1299.42045

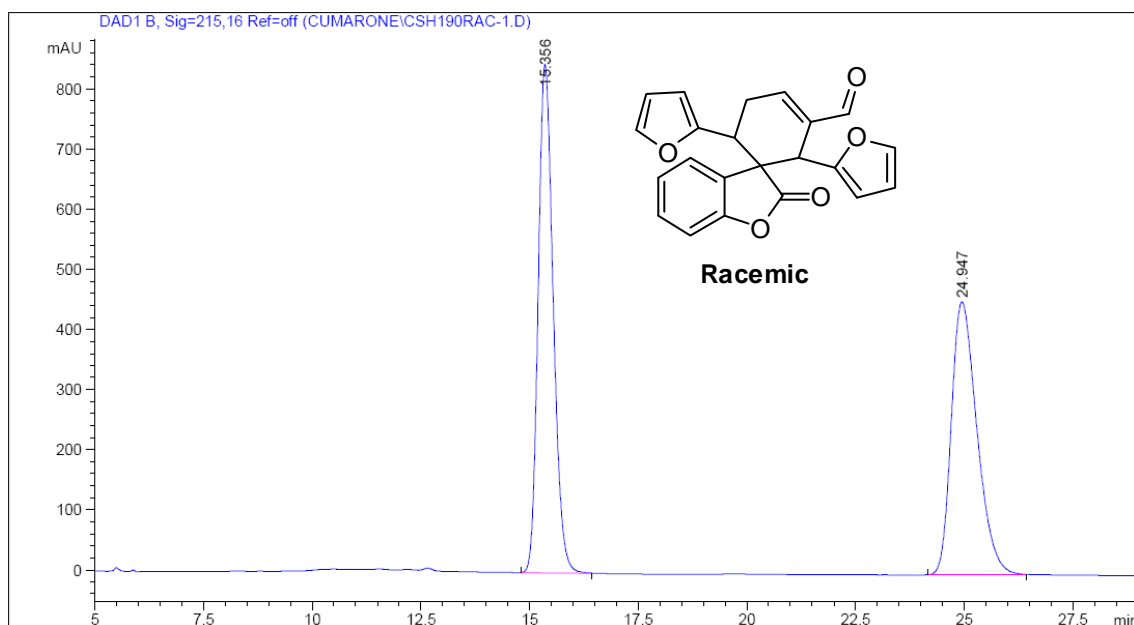

| Peak # | RetTime [min] | Type | Width [min] | Area [mAU*s] | Height [mAU] | Area %  |
|--------|---------------|------|-------------|--------------|--------------|---------|
| 1      | 15.356        | BB   | 0.3718      | 2.02829e4    | 845.85413    | 52.1302 |
| 2      | 24.947        | BB   | 0.6307      | 1.86252e4    | 453.93668    | 47.8698 |

Totals : 3.89081e4 1299.79080

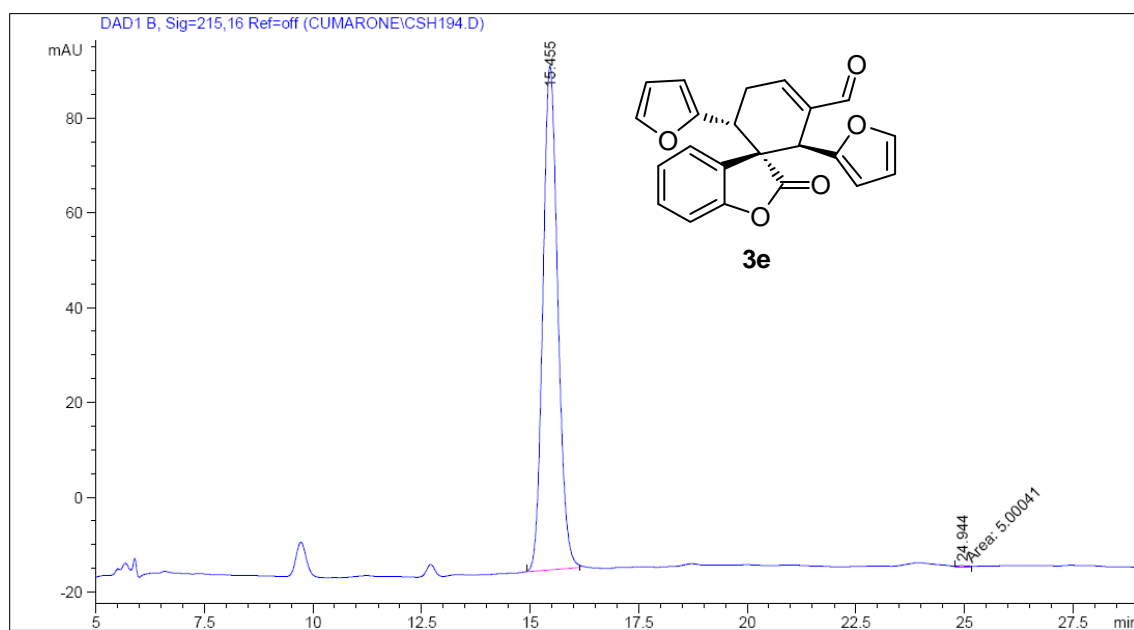

| Peak # | RetTime [min] | Type | Width [min] | Area [mAU*s] | Height [mAU] | Area %  |
|--------|---------------|------|-------------|--------------|--------------|---------|
| 1      | 15.455        | BB   | 0.3681      | 2534.28735   | 106.31599    | 99.8031 |
| 2      | 24.944        | MM   | 0.3252      | 5.00041      | 2.56305e-1   | 0.1969  |

Totals : 2539.28776 106.57230



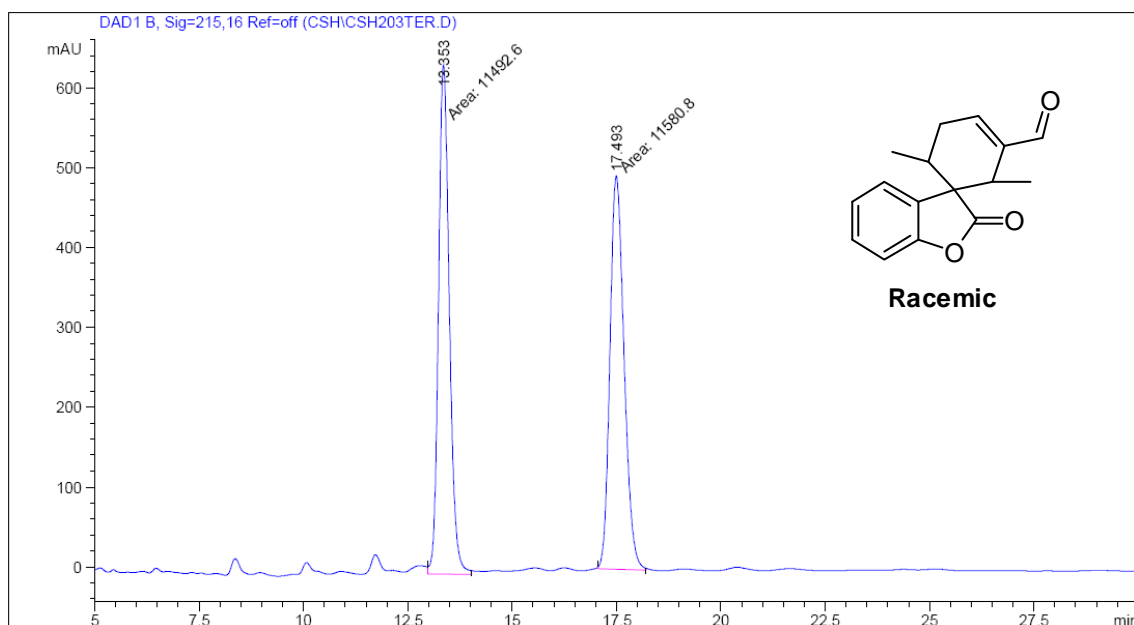

| Peak # | RetTime [min] | Type | Width [min] | Area [mAU*s] | Height [mAU] | Area %  |
|--------|---------------|------|-------------|--------------|--------------|---------|
| 1      | 13.353        | MM   | 0.3005      | 1.14926e4    | 637.48785    | 49.8089 |
| 2      | 17.493        | MM   | 0.3920      | 1.15808e4    | 492.41885    | 50.1911 |

Totals : 2.30733e4 1129.90671

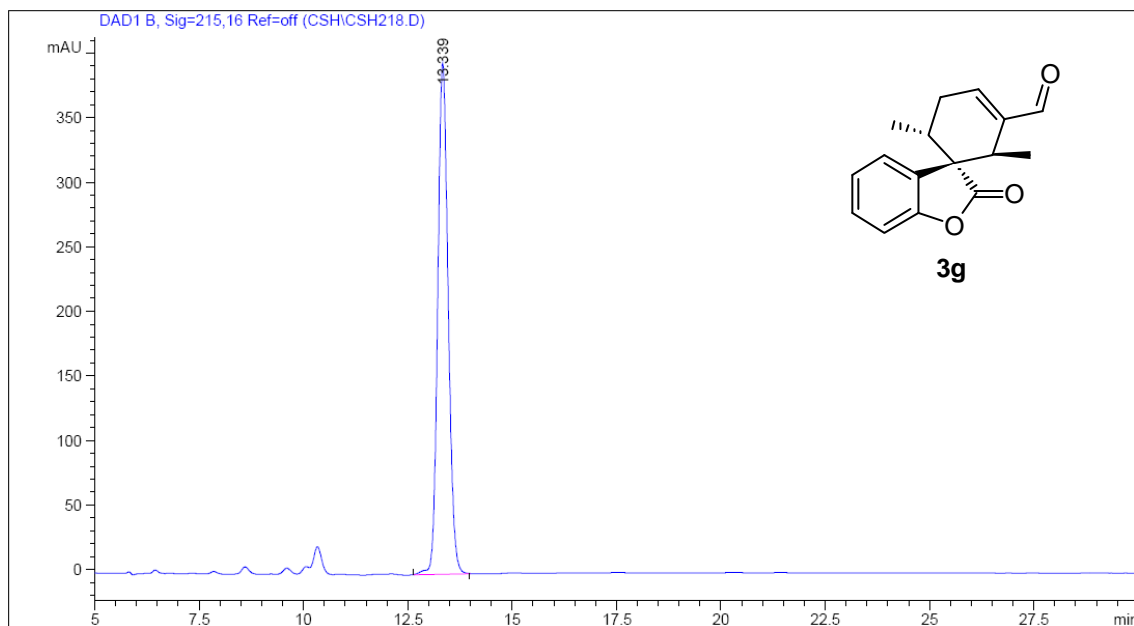

| Peak # | RetTime [min] | Type | Width [min] | Area [mAU*s] | Height [mAU] | Area %   |
|--------|---------------|------|-------------|--------------|--------------|----------|
| 1      | 13.339        | BB   | 0.2689      | 6886.70850   | 395.95444    | 100.0000 |

Totals : 6886.70850 395.95444

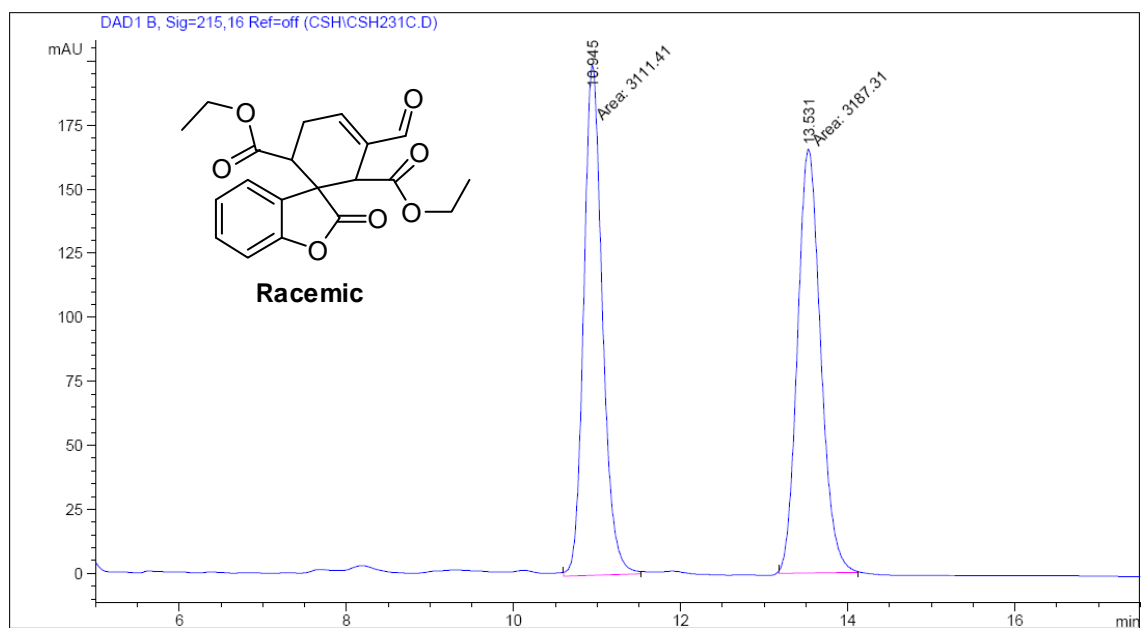

| Peak #   | RetTime [min] | Type | Width [min] | Area [mAU*s] | Height [mAU] | Area %  |
|----------|---------------|------|-------------|--------------|--------------|---------|
| 1        | 10.945        | MM   | 0.2604      | 3111.40918   | 199.17015    | 49.3975 |
| 2        | 13.531        | MM   | 0.3212      | 3187.31494   | 165.39786    | 50.6025 |
| Totals : |               |      |             | 6298.72412   | 364.56801    |         |

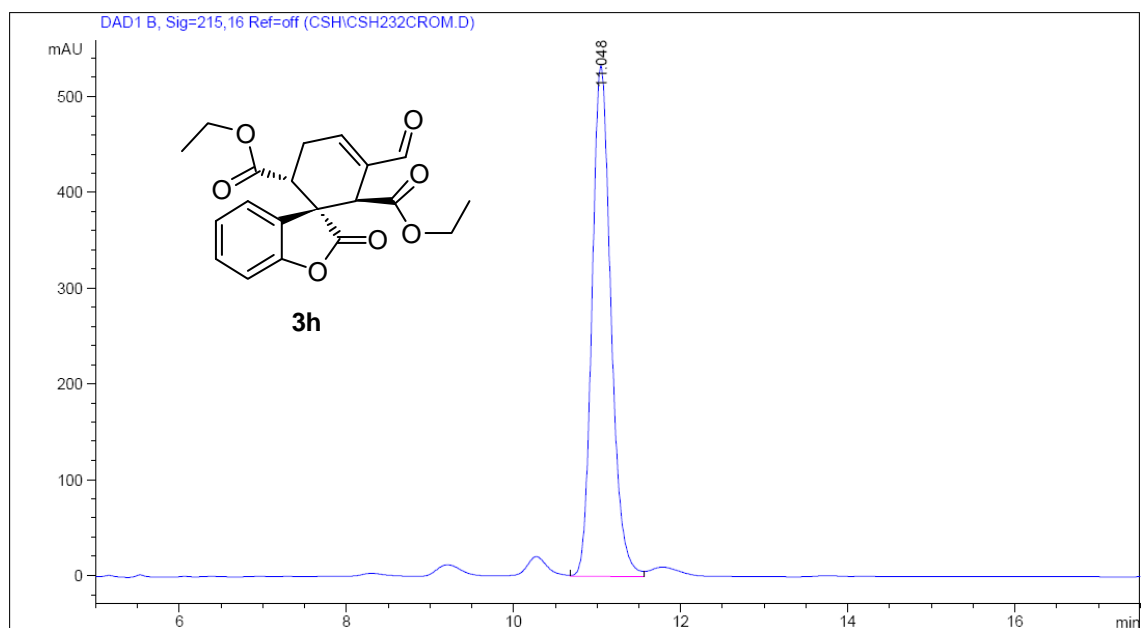

| Peak #   | RetTime [min] | Type | Width [min] | Area [mAU*s] | Height [mAU] | Area %   |
|----------|---------------|------|-------------|--------------|--------------|----------|
| 1        | 11.048        | VV   | 0.2412      | 8376.80273   | 533.57141    | 100.0000 |
| Totals : |               |      |             | 8376.80273   | 533.57141    |          |

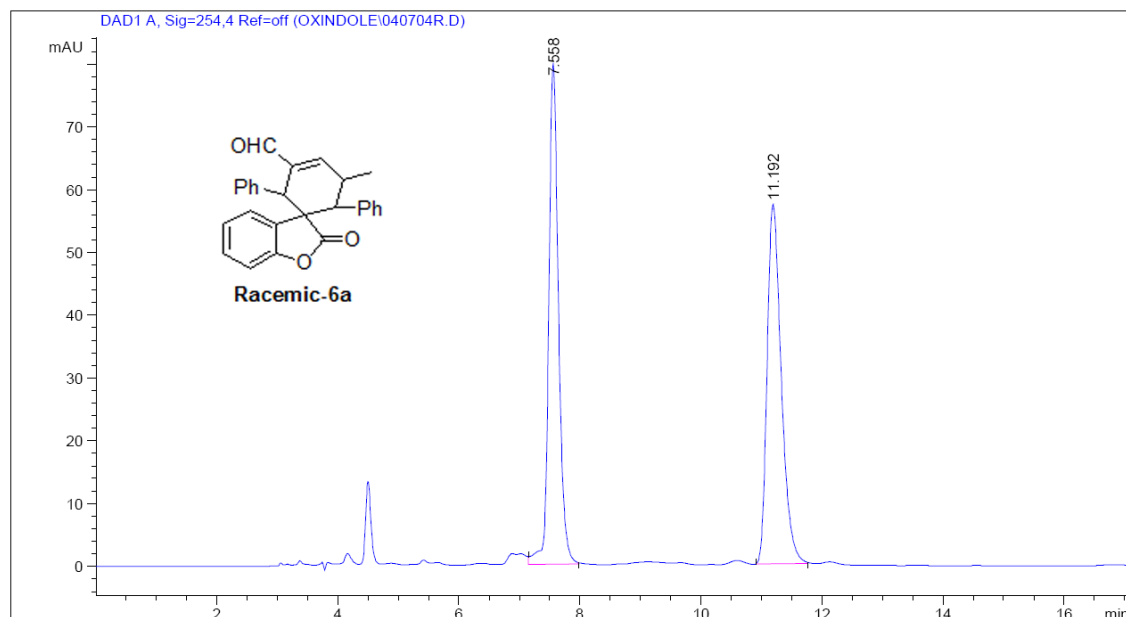

| Peak # | RetTime [min] | Type | Width [min] | Area [mAU*s] | Height [mAU] | Area %  |
|--------|---------------|------|-------------|--------------|--------------|---------|
| 1      | 7.558         | VB   | 0.1685      | 893.03986    | 79.82891     | 49.0211 |
| 2      | 11.192        | BB   | 0.2493      | 928.70636    | 57.24773     | 50.9789 |

Totals : 1821.74622 137.07664

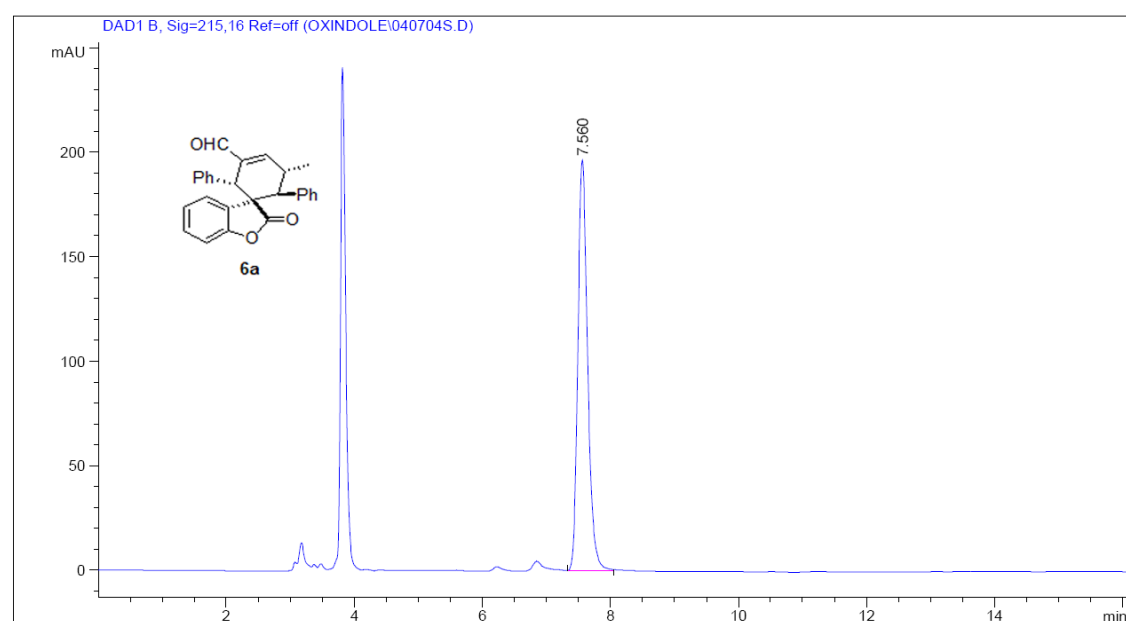

| Peak # | RetTime [min] | Type | Width [min] | Area [mAU*s] | Height [mAU] | Area %   |
|--------|---------------|------|-------------|--------------|--------------|----------|
| 1      | 7.560         | BB   | 0.1609      | 2070.22314   | 196.46526    | 100.0000 |

Totals : 2070.22314 196.46526

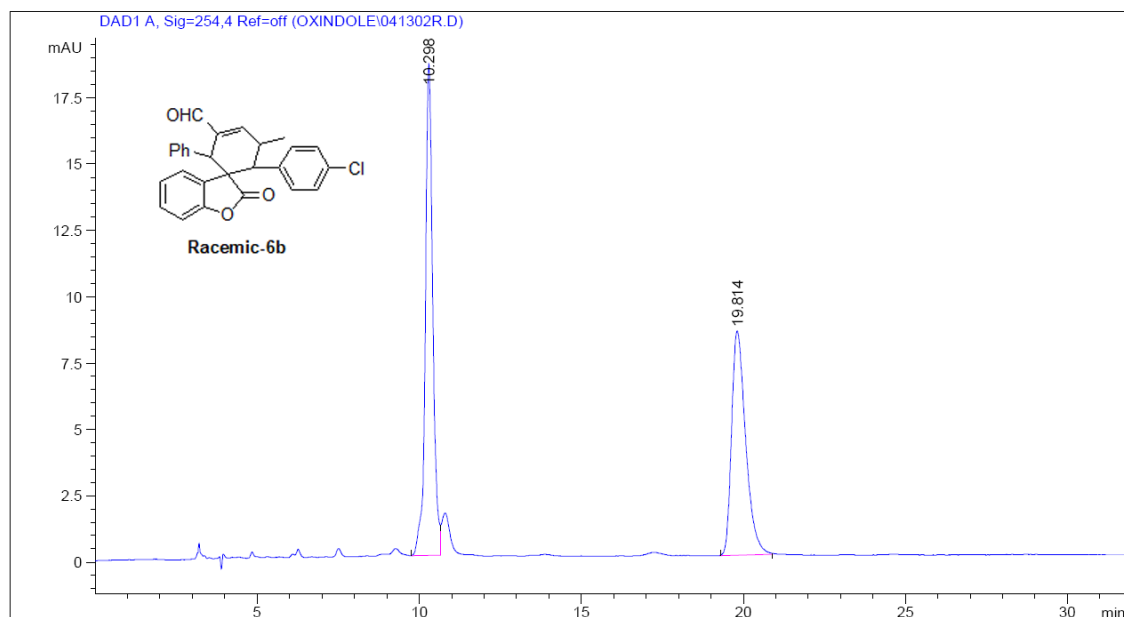

| Peak # | RetTime [min] | Type | Width [min] | Area [mAU*s] | Height [mAU] | Area %  |
|--------|---------------|------|-------------|--------------|--------------|---------|
| 1      | 10.298        | VV   | 0.2396      | 295.30478    | 18.56240     | 53.6445 |
| 2      | 19.814        | BB   | 0.4605      | 255.17995    | 8.44560      | 46.3555 |

Totals : 550.48473 27.00800

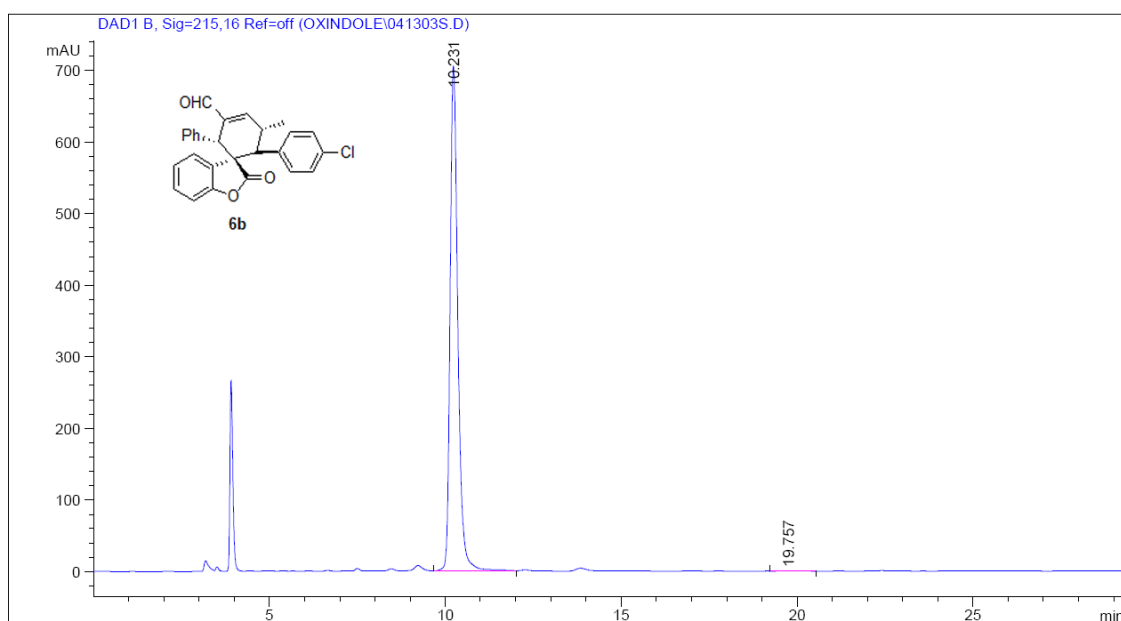

| Peak # | RetTime [min] | Type | Width [min] | Area [mAU*s] | Height [mAU] | Area %  |
|--------|---------------|------|-------------|--------------|--------------|---------|
| 1      | 10.231        | VV   | 0.2332      | 1.08471e4    | 706.24823    | 99.7885 |
| 2      | 19.757        | BB   | 0.5324      | 22.98749     | 6.50257e-1   | 0.2115  |

Totals : 1.08701e4 706.89849

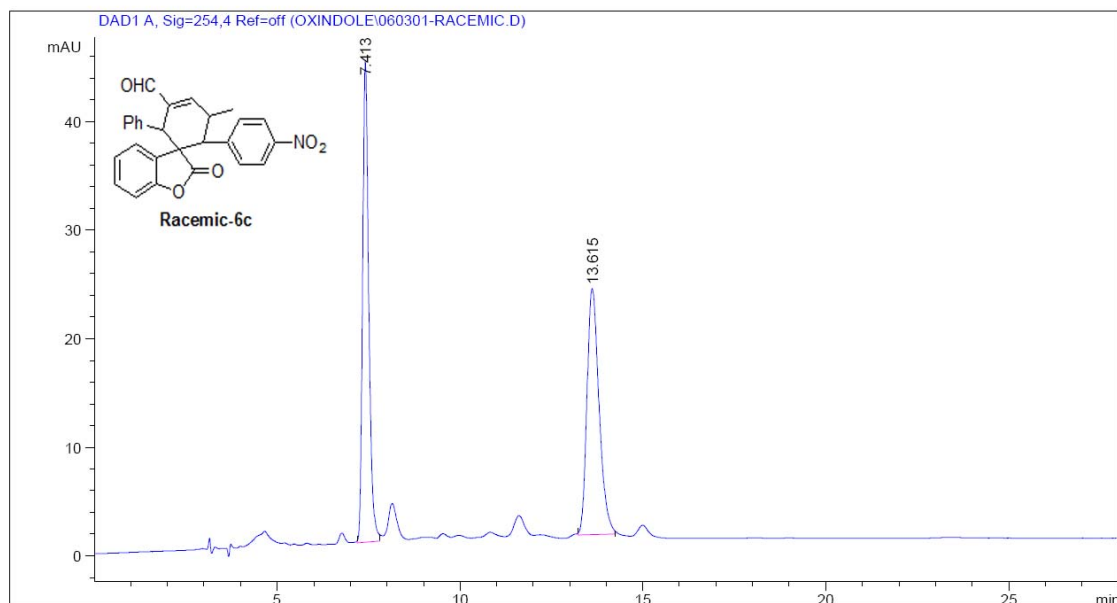

| Peak # | RetTime [min] | Type | Width [min] | Area [mAU*s] | Height [mAU] | Area %  |
|--------|---------------|------|-------------|--------------|--------------|---------|
| 1      | 7.413         | BB   | 0.1785      | 517.09528    | 44.21056     | 49.8833 |
| 2      | 13.615        | BB   | 0.3514      | 519.51532    | 22.66383     | 50.1167 |

Totals : 1036.61060 66.87438

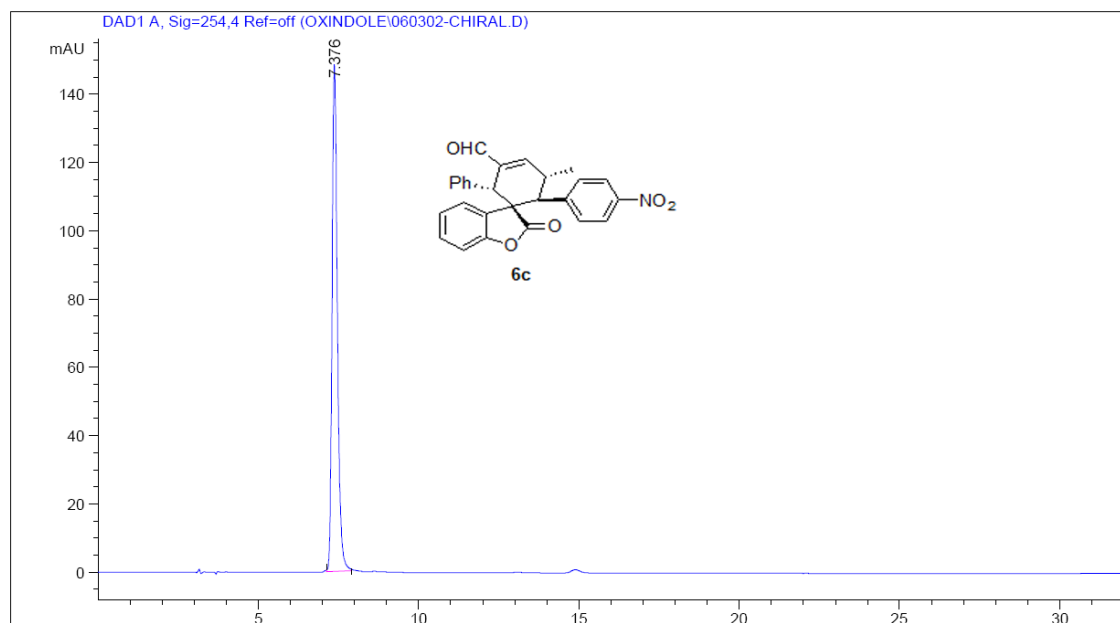

| Peak # | RetTime [min] | Type | Width [min] | Area [mAU*s] | Height [mAU] | Area %   |
|--------|---------------|------|-------------|--------------|--------------|----------|
| 1      | 7.376         | BB   | 0.1764      | 1709.62134   | 148.41934    | 100.0000 |

Totals : 1709.62134 148.41934

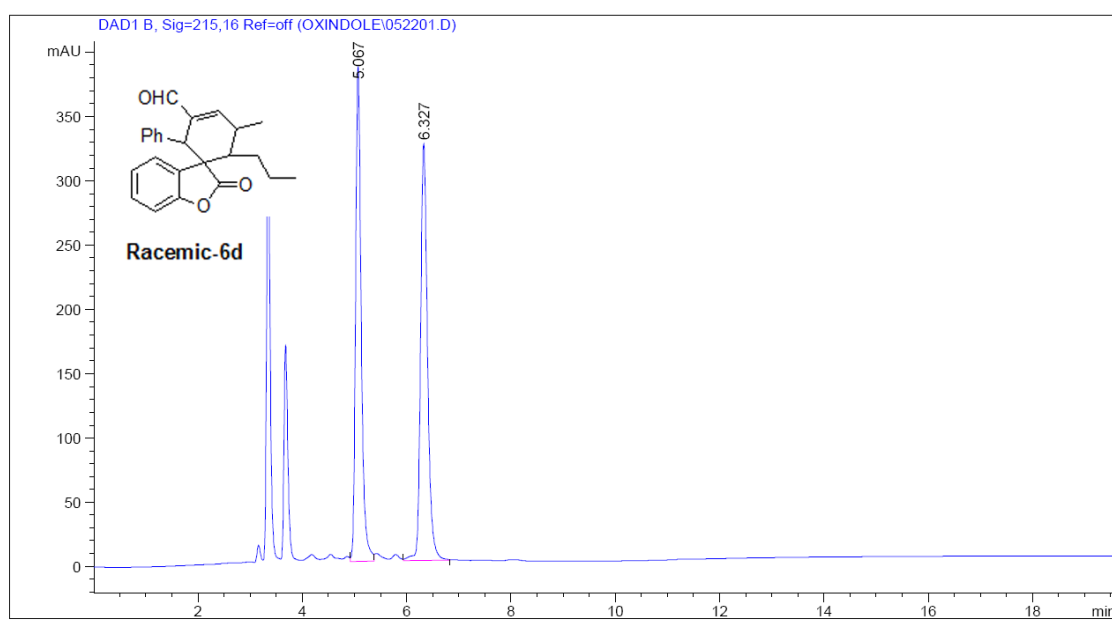

| Peak # | RetTime [min] | Type | Width [min] | Area [mAU*s] | Height [mAU] | Area %  |
|--------|---------------|------|-------------|--------------|--------------|---------|
| 1      | 5.067         | VV   | 0.1128      | 2863.28296   | 384.98648    | 48.8830 |
| 2      | 6.327         | VB   | 0.1398      | 2994.13232   | 323.98511    | 51.1170 |

Totals : 5857.41528 708.97159

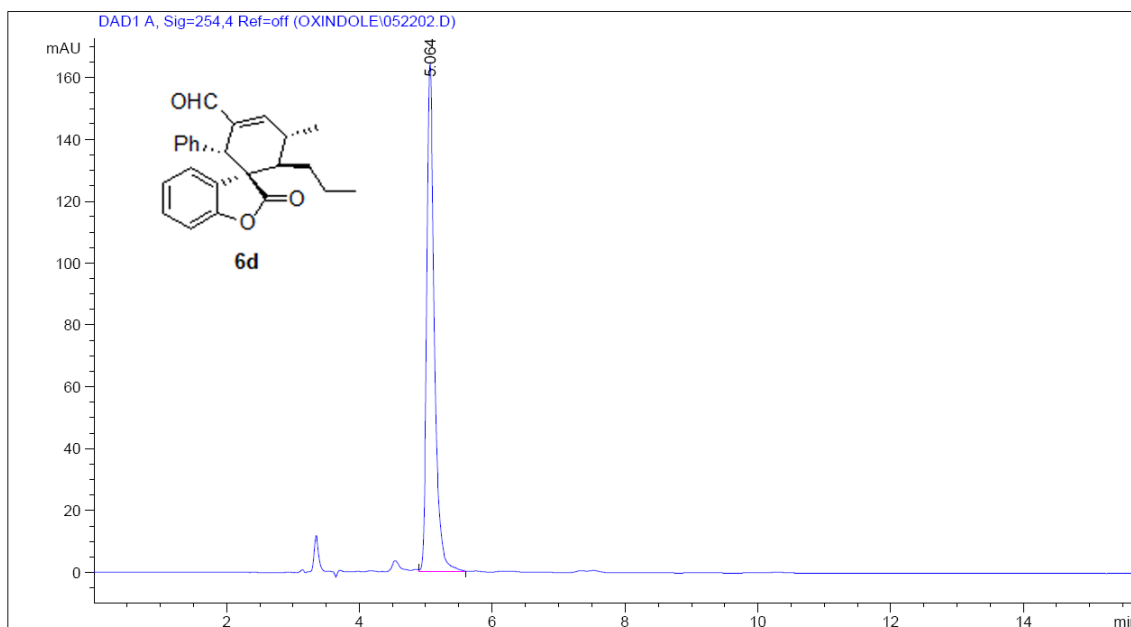

| Peak # | RetTime [min] | Type | Width [min] | Area [mAU*s] | Height [mAU] | Area %   |
|--------|---------------|------|-------------|--------------|--------------|----------|
| 1      | 5.064         | VB   | 0.1207      | 1304.41675   | 164.21667    | 100.0000 |

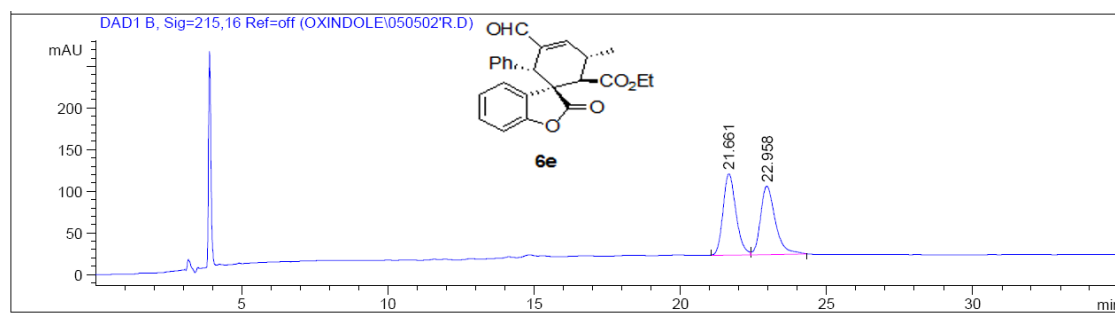

| Peak # | RetTime [min] | Type | Width [min] | Area [mAU*s] | Height [mAU] | Area %  |
|--------|---------------|------|-------------|--------------|--------------|---------|
| 1      | 21.661        | BV   | 0.4717      | 2996.48315   | 97.72817     | 50.9459 |
| 2      | 22.958        | VB   | 0.5330      | 2885.21094   | 82.30801     | 49.0541 |

Totals : 5881.69409 180.03618

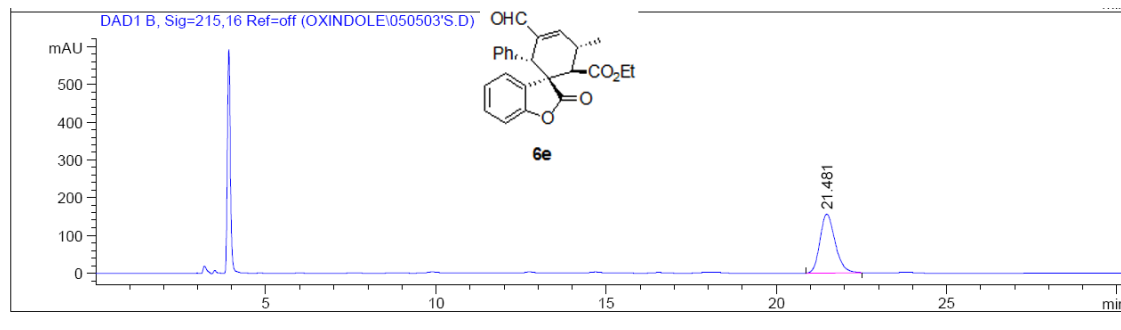

| Peak # | RetTime [min] | Type | Width [min] | Area [mAU*s] | Height [mAU] | Area %   |
|--------|---------------|------|-------------|--------------|--------------|----------|
| 1      | 21.481        | BB   | 0.4745      | 4815.64795   | 155.86356    | 100.0000 |

Totals : 4815.64795 155.86356

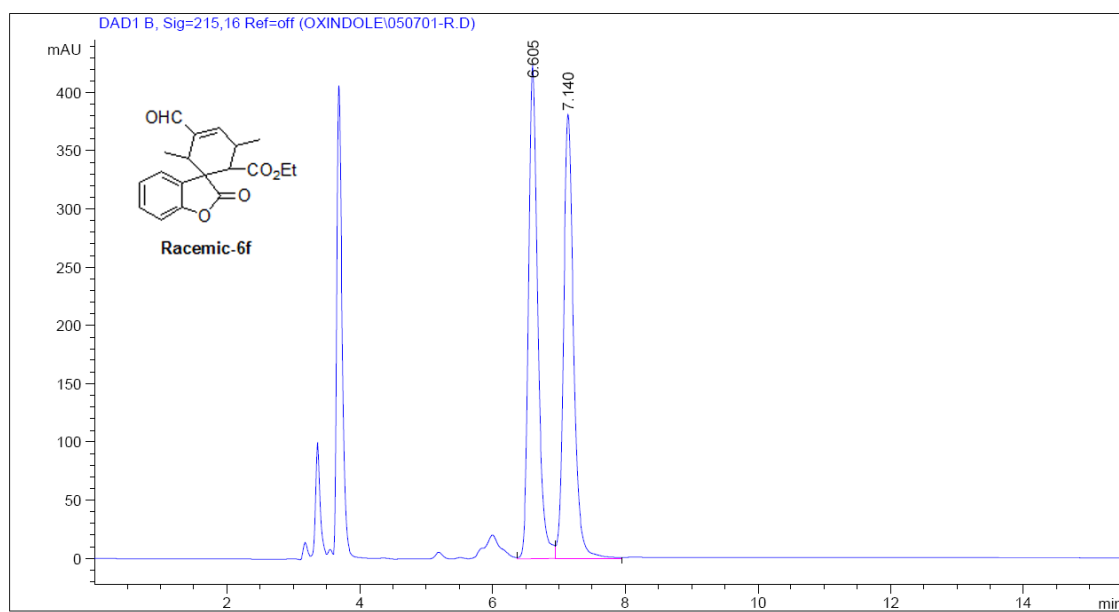

| Peak # | RetTime [min] | Type | Width [min] | Area [mAU*s] | Height [mAU] | Area %  |
|--------|---------------|------|-------------|--------------|--------------|---------|
| 1      | 6.605         | VV   | 0.1473      | 4122.35059   | 424.40817    | 50.7078 |
| 2      | 7.140         | VV   | 0.1586      | 4007.27393   | 381.41028    | 49.2922 |

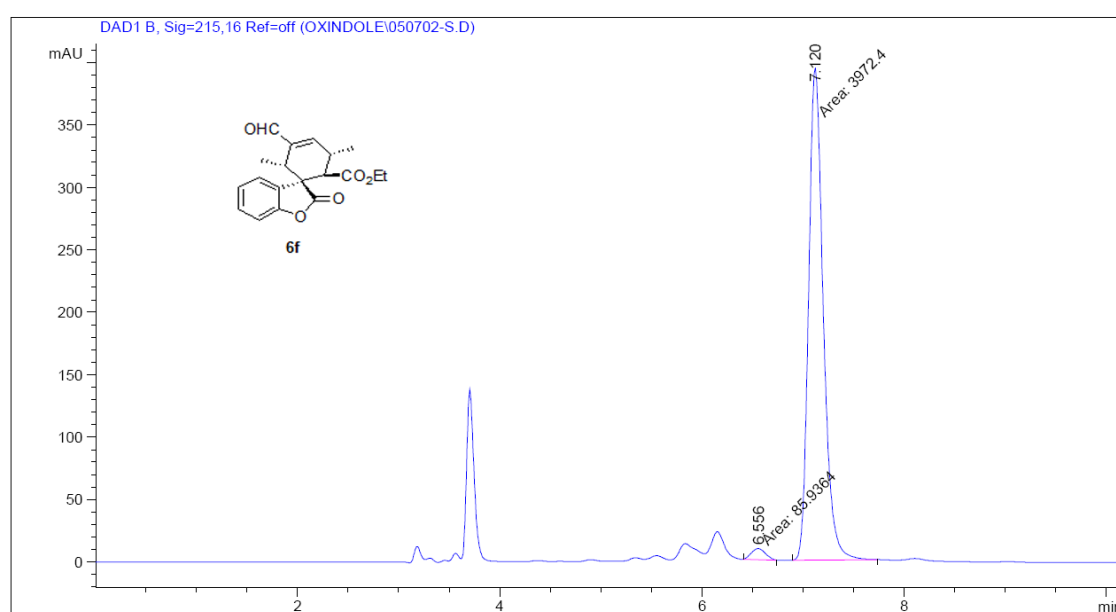

| Peak # | RetTime [min] | Type | Width [min] | Area [mAU*s] | Height [mAU] | Area %  |
|--------|---------------|------|-------------|--------------|--------------|---------|
| 1      | 6.556         | MM   | 0.1627      | 85.93645     | 8.80227      | 2.1175  |
| 2      | 7.120         | MM   | 0.1678      | 3972.39990   | 394.46863    | 97.8825 |



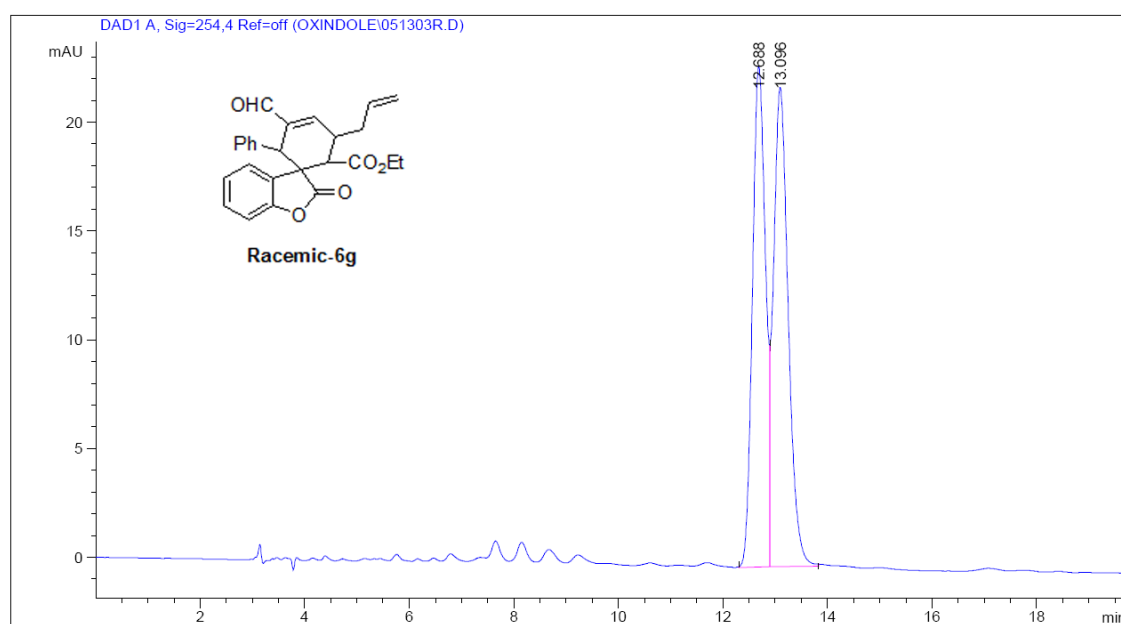

| Peak # | RetTime [min] | Type | Width [min] | Area [mAU*s] | Height [mAU] | Area %  |
|--------|---------------|------|-------------|--------------|--------------|---------|
| 1      | 12.688        | BV   | 0.2673      | 396.86142    | 22.99793     | 47.6897 |
| 2      | 13.096        | VB   | 0.2964      | 435.31317    | 22.04634     | 52.3103 |

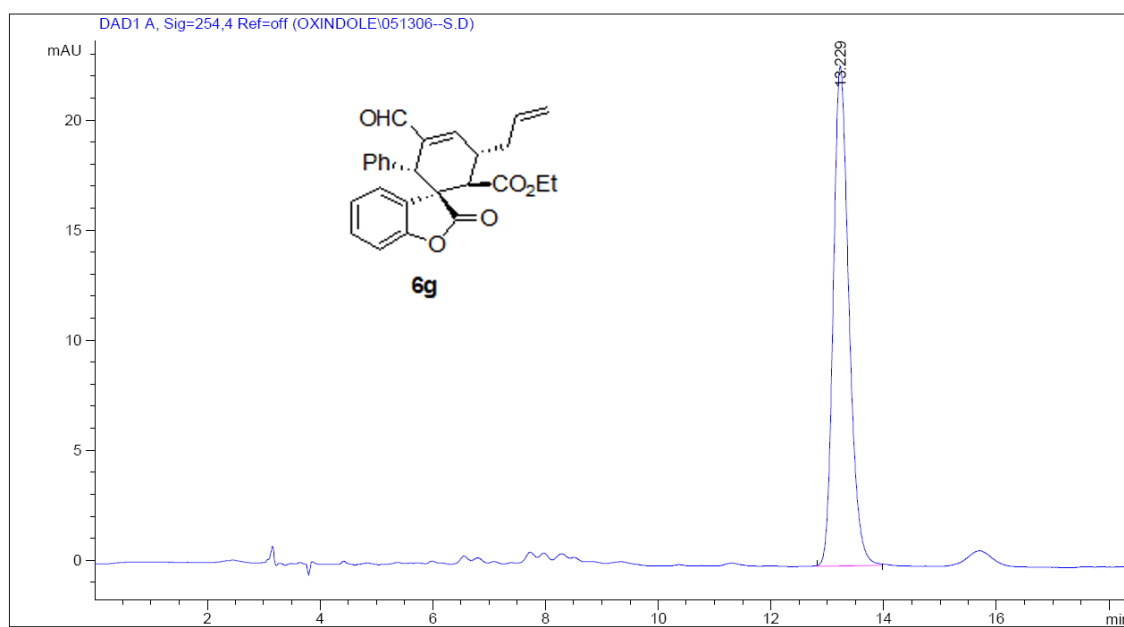

| Peak # | RetTime [min] | Type | Width [min] | Area [mAU*s] | Height [mAU] | Area %   |
|--------|---------------|------|-------------|--------------|--------------|----------|
| 1      | 13.229        | BB   | 0.2949      | 438.18790    | 22.73048     | 100.0000 |

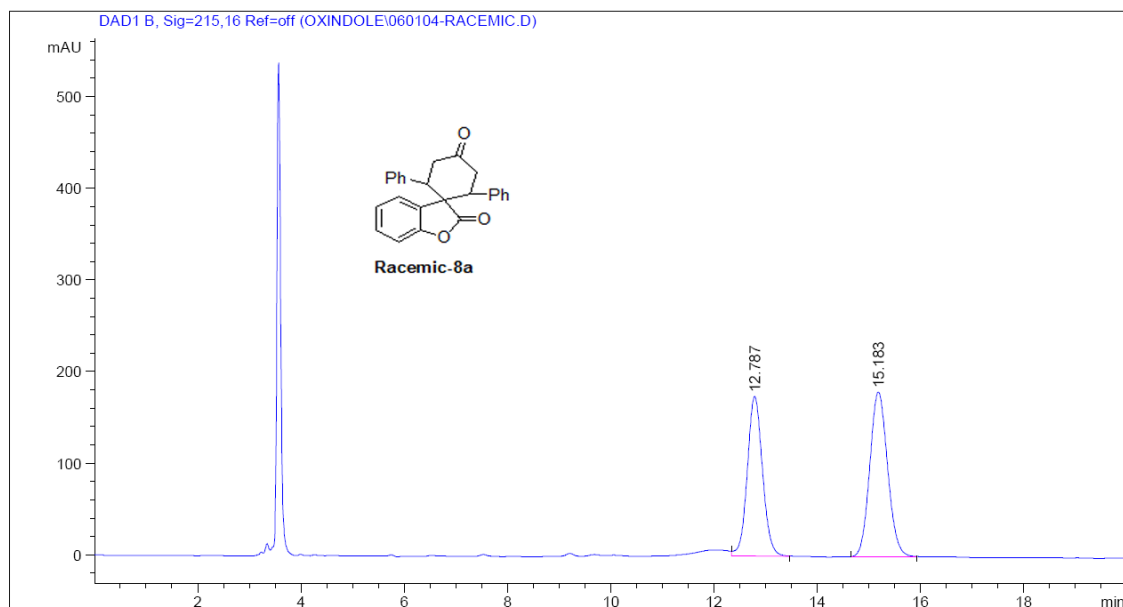

| Peak # | RetTime [min] | Type | Width [min] | Area [mAU*s] | Height [mAU] | Area %  |
|--------|---------------|------|-------------|--------------|--------------|---------|
| 1      | 12.787        | VB   | 0.3144      | 3557.84595   | 174.12607    | 45.1816 |
| 2      | 15.183        | BB   | 0.3721      | 4316.69287   | 179.77072    | 54.8184 |

Totals : 7874.53882 353.89679

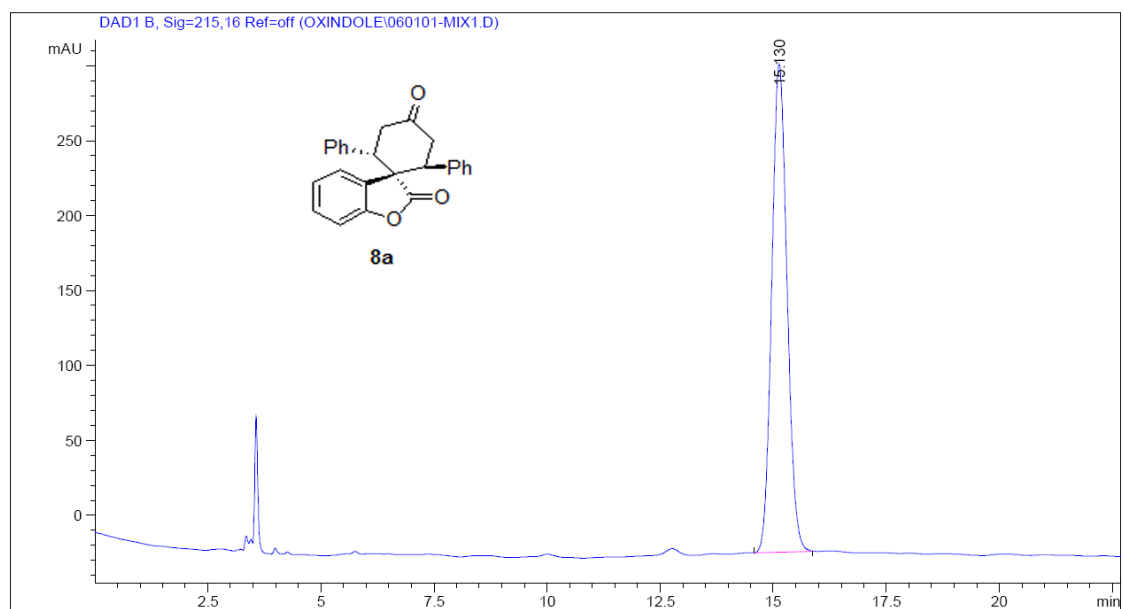

| Peak # | RetTime [min] | Type | Width [min] | Area [mAU*s] | Height [mAU] | Area %   |
|--------|---------------|------|-------------|--------------|--------------|----------|
| 1      | 15.130        | BB   | 0.3665      | 7662.42773   | 325.67902    | 100.0000 |

Totals : 7662.42773 325.67902

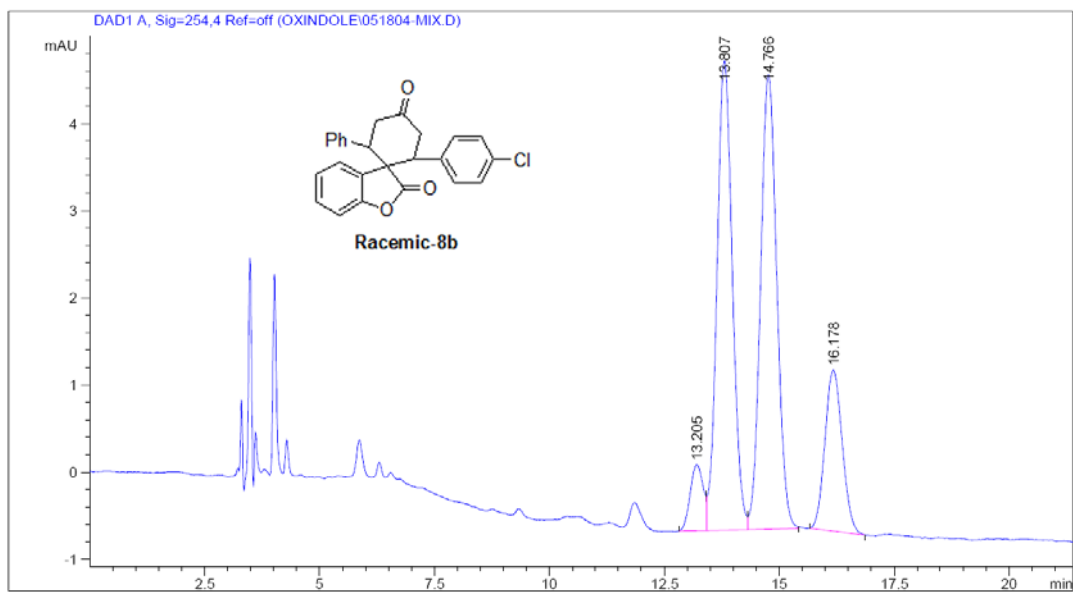

| Peak # | RetTime [min] | Type | Width [min] | Area [mAU*s] | Height [mAU] | Area %  |
|--------|---------------|------|-------------|--------------|--------------|---------|
| 1      | 13.205        | BV   | 0.2982      | 15.02096     | 7.61356e-1   | 4.7541  |
| 2      | 13.807        | VV   | 0.3613      | 125.19480    | 5.38422      | 39.6236 |
| 3      | 14.766        | VB   | 0.3832      | 127.39693    | 5.21051      | 40.3205 |
| 4      | 16.178        | BB   | 0.4090      | 48.34781     | 1.84911      | 15.3019 |

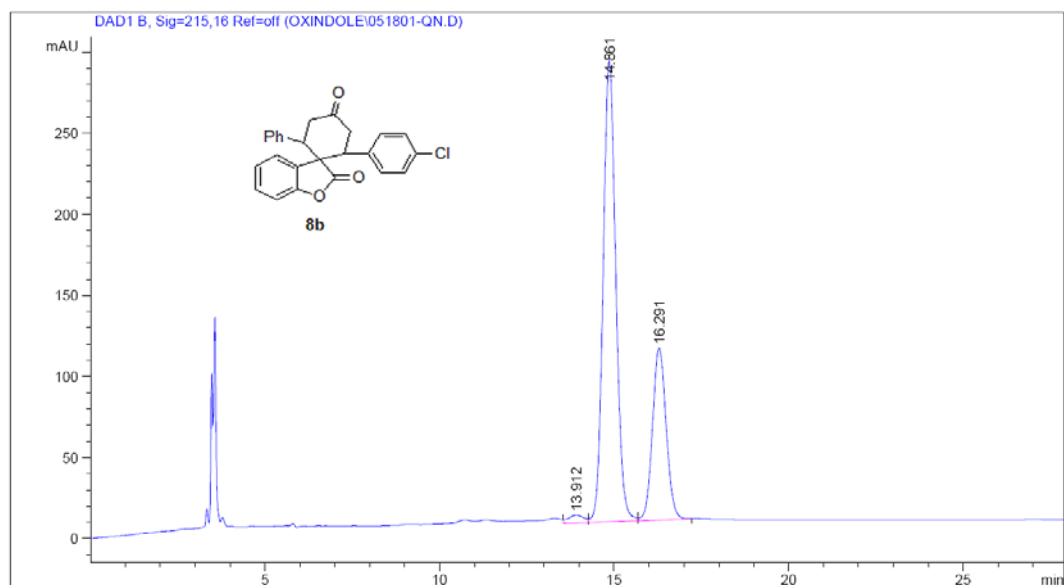

| Peak # | RetTime [min] | Type | Width [min] | Area [mAU*s] | Height [mAU] | Area %  |
|--------|---------------|------|-------------|--------------|--------------|---------|
| 1      | 13.912        | VV   | 0.4350      | 141.54593    | 4.73223      | 1.3900  |
| 2      | 14.861        | VV   | 0.3896      | 7146.10107   | 283.94275    | 70.1754 |
| 3      | 16.291        | VB   | 0.4244      | 2895.55713   | 106.08842    | 28.4346 |

Totals : 1.01832e4 394.76339

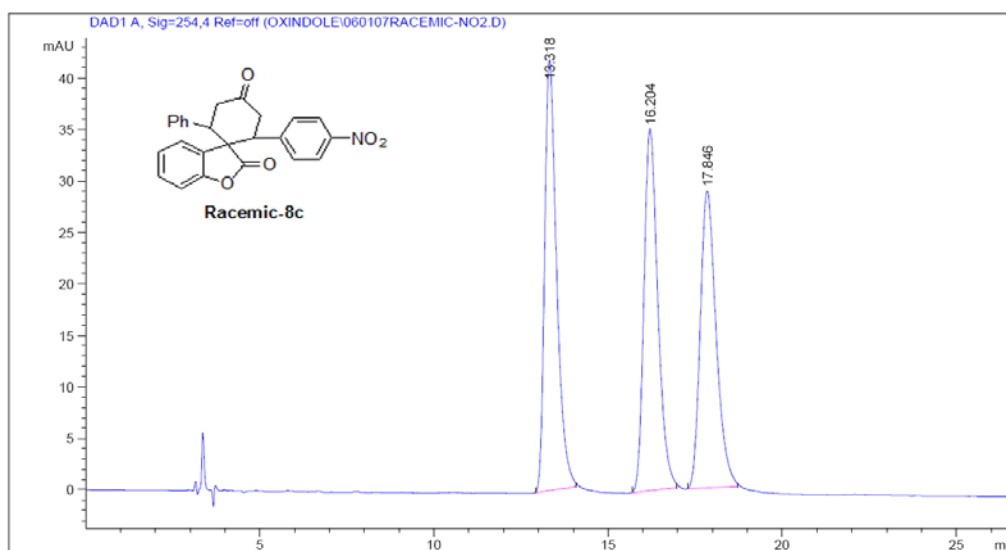

| Peak # | RetTime [min] | Type | Width [min] | Area [mAU*s] | Height [mAU] | Area %  |
|--------|---------------|------|-------------|--------------|--------------|---------|
| 1      | 13.318        | BB   | 0.3622      | 996.94922    | 41.81077     | 34.6261 |
| 2      | 16.204        | BB   | 0.4238      | 969.32153    | 35.14362     | 33.6665 |
| 3      | 17.846        | BB   | 0.4852      | 912.91486    | 28.84921     | 31.7074 |

Totals : 2879.18561 105.80360

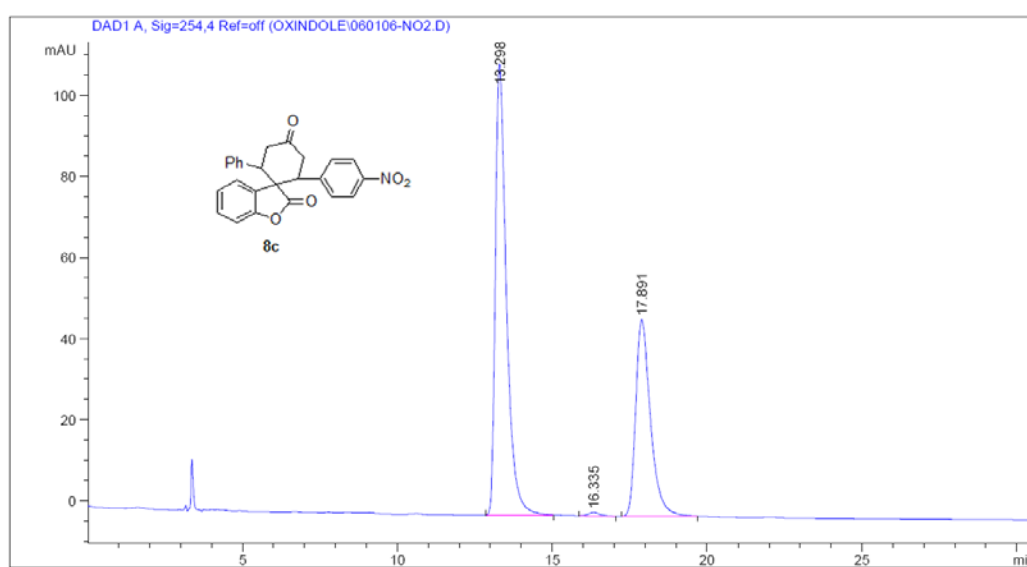

| Peak # | RetTime [min] | Type | Width [min] | Area [mAU*s] | Height [mAU] | Area %  |
|--------|---------------|------|-------------|--------------|--------------|---------|
| 1      | 13.298        | BB   | 0.3735      | 2759.95361   | 111.21998    | 62.7875 |
| 2      | 16.335        | BB   | 0.3966      | 22.43440     | 8.21449e-1   | 0.5104  |
| 3      | 17.891        | BB   | 0.5020      | 1613.31628   | 48.50914     | 36.7021 |

Totals : 4395.70429 160.55057

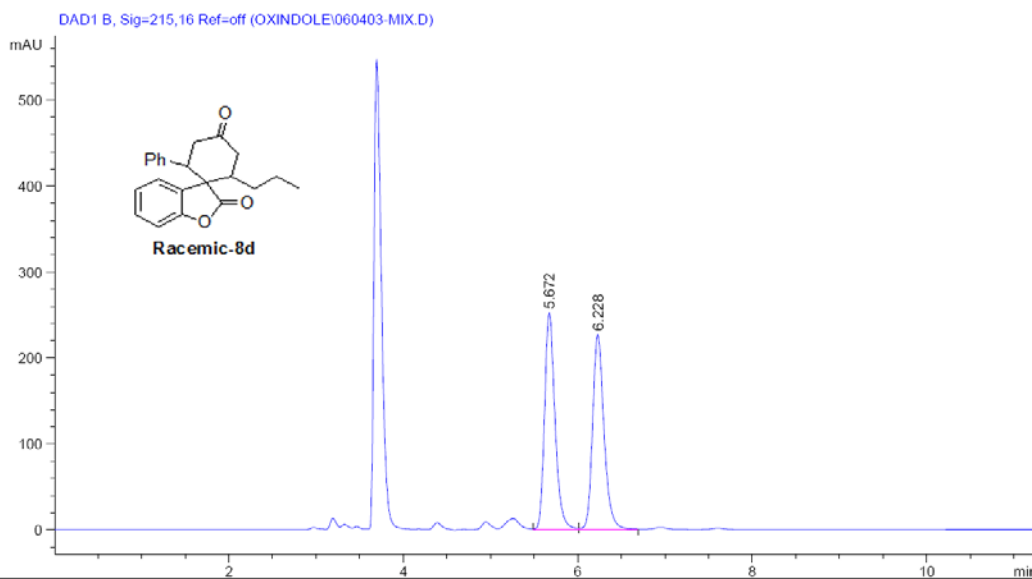

| Peak # | RetTime [min] | Type | Width [min] | Area [mAU*s] | Height [mAU] | Area %  |
|--------|---------------|------|-------------|--------------|--------------|---------|
| 1      | 5.672         | VV   | 0.1254      | 2109.42700   | 252.73001    | 50.3026 |
| 2      | 6.228         | VB   | 0.1411      | 2084.04736   | 227.09576    | 49.6974 |

Totals : 4193.47437 479.82578

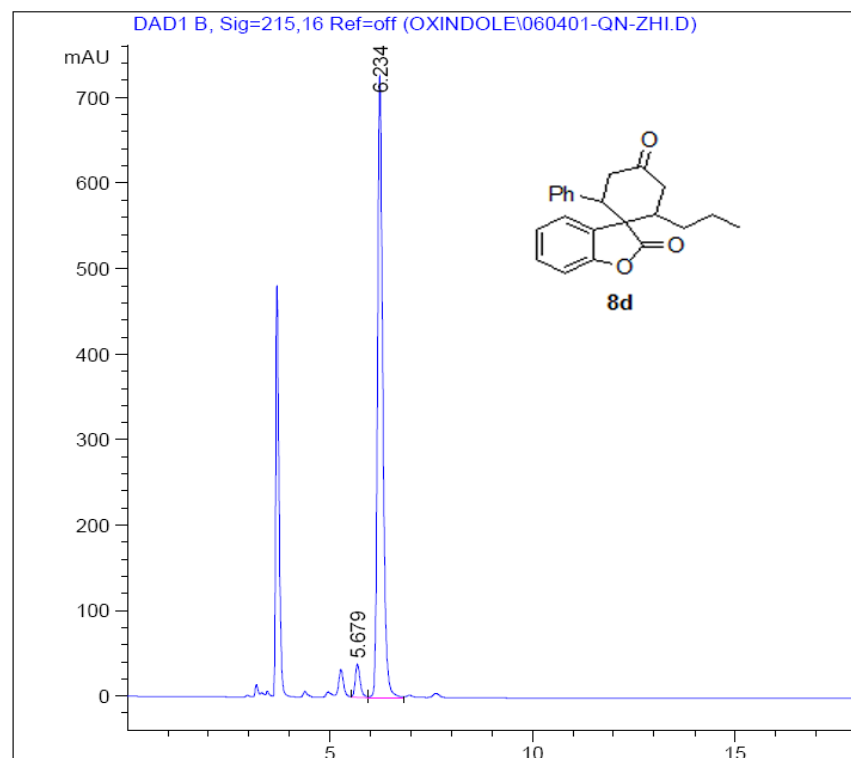

| Peak # | RetTime [min] | Type | Width [min] | Area [mAU*s] | Height [mAU] | Area %  |
|--------|---------------|------|-------------|--------------|--------------|---------|
| 1      | 5.679         | VV   | 0.1284      | 328.50851    | 38.95597     | 4.6957  |
| 2      | 6.234         | VB   | 0.1390      | 6667.37256   | 726.91235    | 95.3043 |

Totals : 6995.88107 765.86832

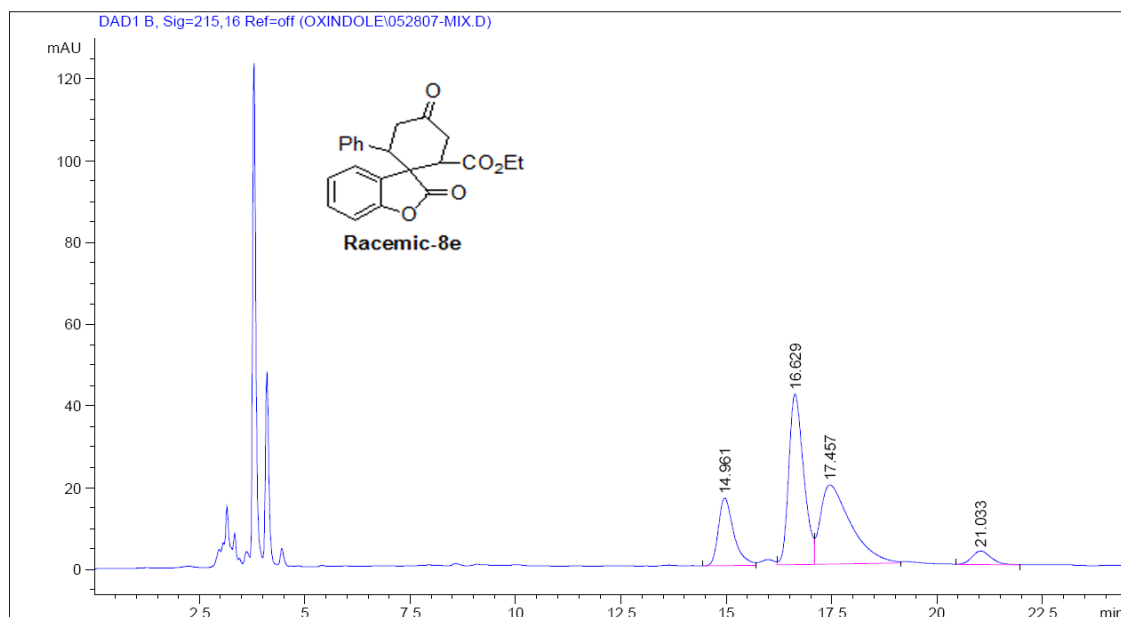

| Peak # | RetTime [min] | Type | Width [min] | Area [mAU*s] | Height [mAU] | Area %  |
|--------|---------------|------|-------------|--------------|--------------|---------|
| 1      | 14.961        | VV   | 0.3804      | 417.68616    | 16.55015     | 16.5353 |
| 2      | 16.629        | VV   | 0.3788      | 1032.48853   | 41.70578     | 40.8739 |
| 3      | 17.457        | VB   | 0.7327      | 973.63269    | 19.36196     | 38.5439 |
| 4      | 21.033        | BB   | 0.4824      | 102.22626    | 3.27292      | 4.0469  |

Totals : 2526.03364 80.89081

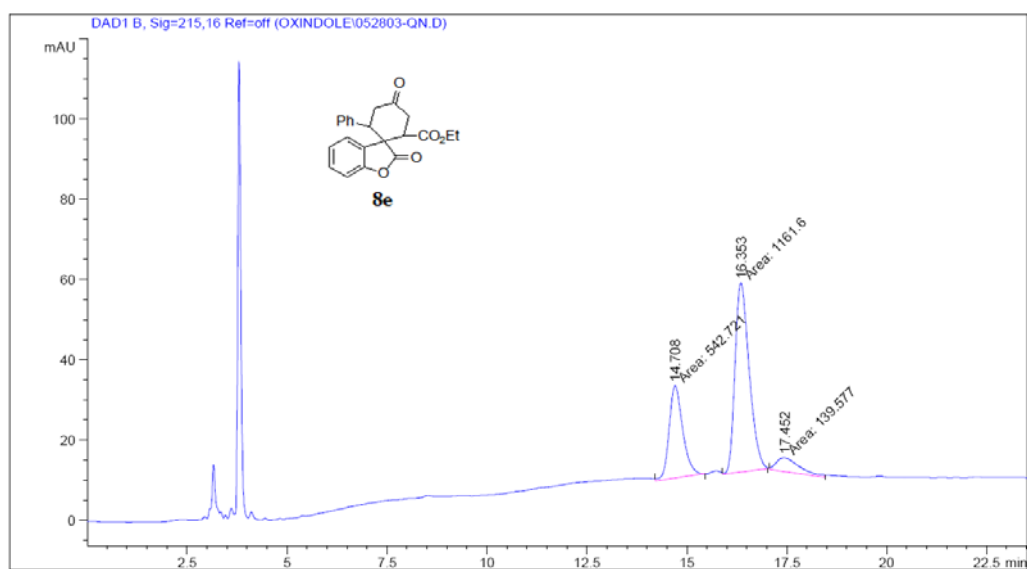

| Peak # | RetTime [min] | Type | Width [min] | Area [mAU*s] | Height [mAU] | Area %  |
|--------|---------------|------|-------------|--------------|--------------|---------|
| 1      | 14.708        | MM   | 0.3935      | 542.72095    | 22.98631     | 29.4333 |
| 2      | 16.353        | MM   | 0.4109      | 1161.60205   | 47.11982     | 62.9970 |
| 3      | 17.452        | MM   | 0.6689      | 139.57697    | 3.47776      | 7.5697  |

Totals : 1843.89996 73.58389

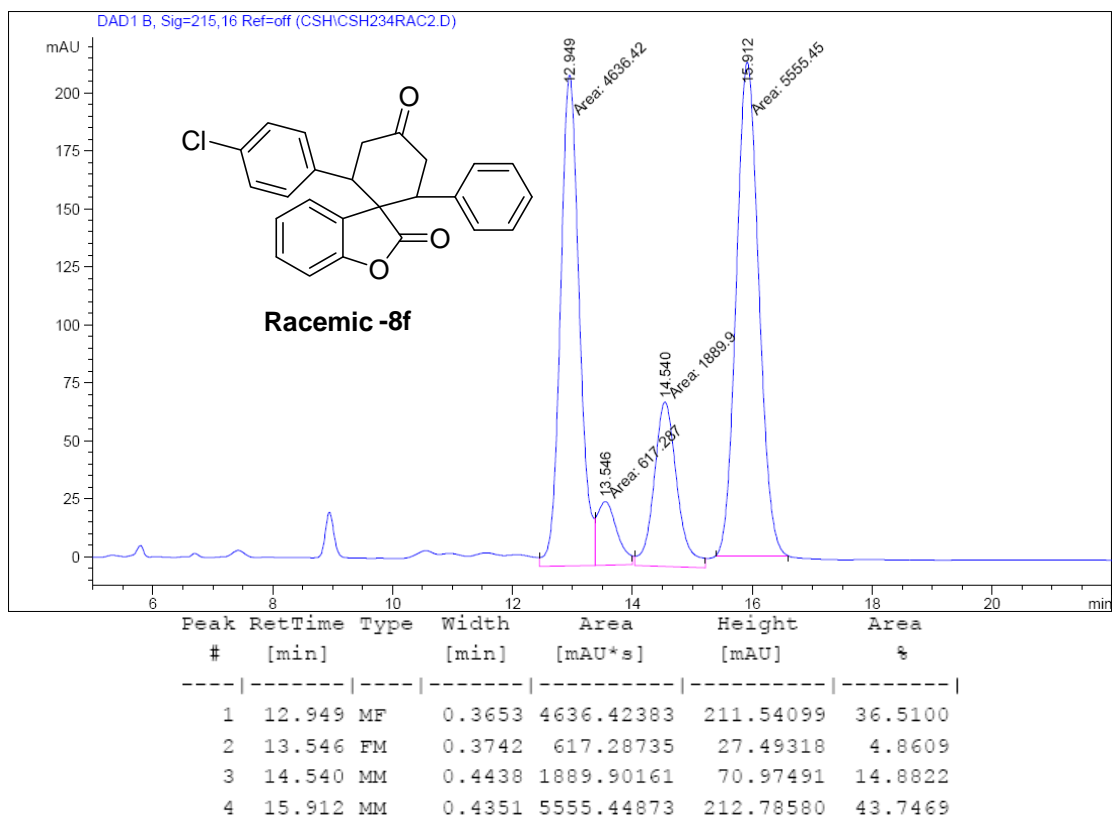

Totals : 1.26991e4 522.79487

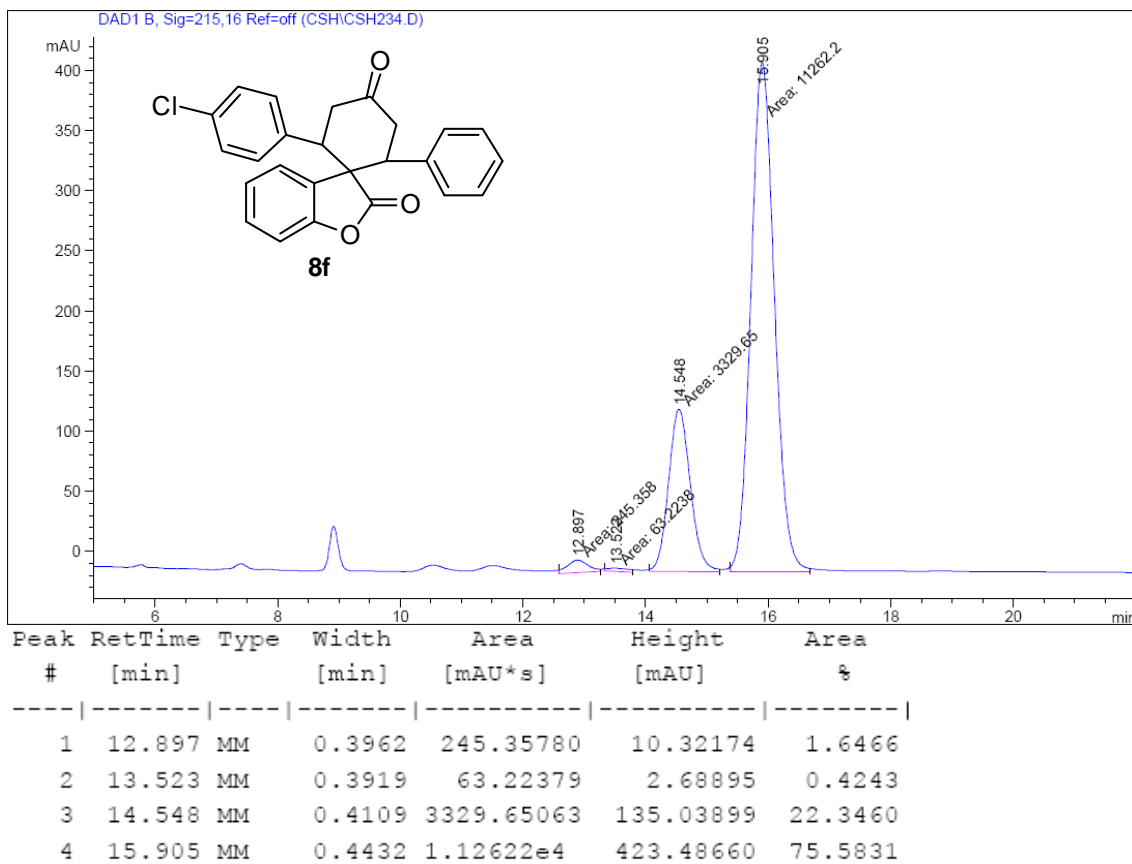

Totals : 1.49004e4 571.53629

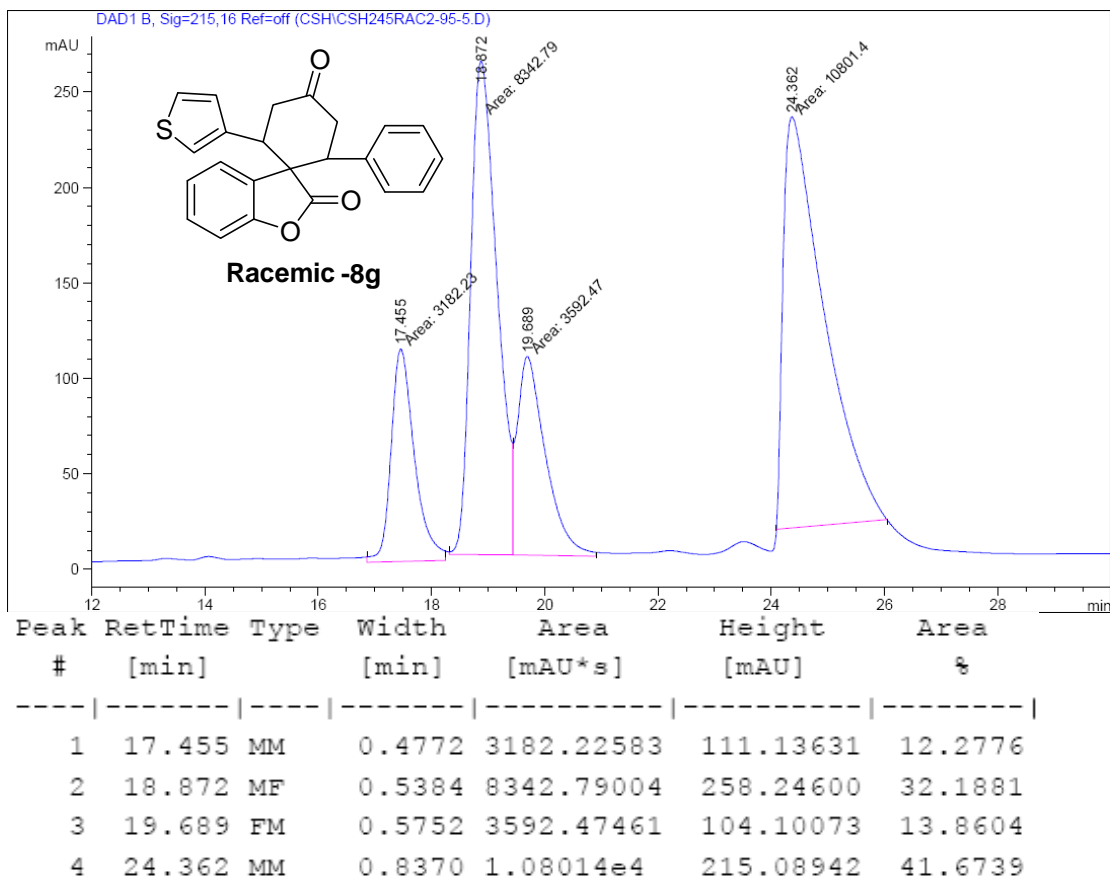

Totals : 2.59189e4 688.57246

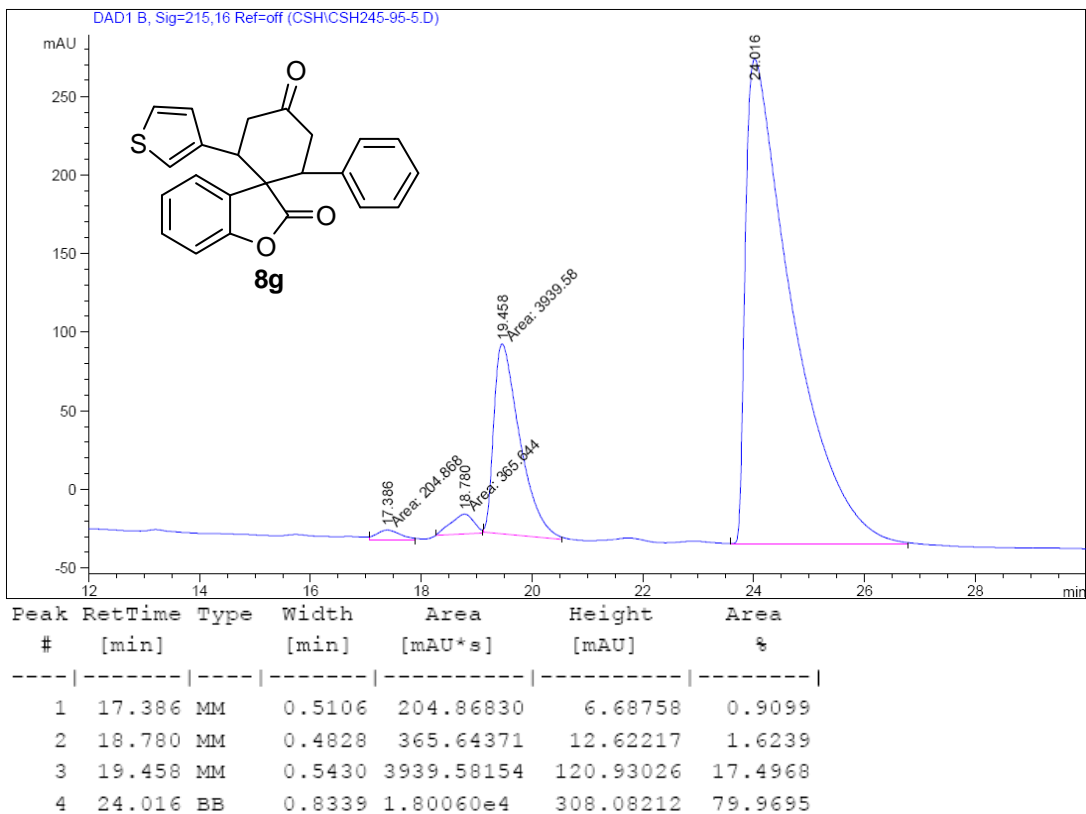

Totals : 2.25161e4 448.32213
